# Supplementary material for: Highly dispersed ruthenium capsulated in UiO-66-NH2 for hydrogen-borrowing-mediated N-alkylation reactions
Source: Royal Society of Chemistry journal article supplement (doi:10.1039/d4cy00161c), 2024-01-01
Supplement: d4cy00161c1.pdf [file d4cy00161c1.pdf]

## Highly Dispersed Ruthenium Capsulated in UiO-66-NH<sub>2</sub> for Borrowing Hydrogen Mediated N-Alkylation Reactions

Jiahao Li,<sup>[a]</sup> Shiguo Ou,<sup>[a]</sup> Xinxin Sang,<sup>[a]\*</sup> Ruirui Chai,<sup>[a]</sup> Dawei Wang<sup>[a]\*</sup>

<sup>[a]</sup> Key Laboratory of Synthetic and Biological Colloids, Ministry of Education, School of Chemical and Material Engineering, Jiangnan University, Wuxi 214122, Jiangsu Province, China. E-mail: sangxx@jiangnan.edu.cn, wangdw@jiangnan.edu.cn

### 1. General Methods and materials:

All the reactions dealing with air and/or moisture-sensitive reactions were carried out under an atmosphere of nitrogen using oven/flame-dried glassware and standard syringe/septa techniques. Unless otherwise noted, all commercial reagents and solvents were obtained from the commercial provider and used without further purification. <sup>1</sup>H NMR and <sup>13</sup>C NMR spectra were recorded on Varian 400 or 101 MHz spectrometers. Chemical shifts were reported relative to internal tetramethylsilane ( $\delta = 0.00$  ppm) or CDCl<sub>3</sub> ( $\delta = 7.26$  ppm) for <sup>1</sup>H NMR and CDCl<sub>3</sub> ( $\delta = 77.0$  ppm) for <sup>13</sup>C NMR. Flash column chromatography was performed on 230-430 mesh silica gel. Analytical thin layer chromatography was performed with precoated glass baked plates (250 $\mu$ ) and visualized by fluorescence and by charring after treatment with potassium permanganate stain. TEM was recorded on a transmission electron microscope (JEM-2100, JEOL, Japan), operating at 200 kV. TEM-EDS was performed on an Avio 200 Transmission Electron Microscope. XPS data were recorded with electron energy analyzer (ESCALAB 250Xi, Thermo Fisher Co, USA). Inductively coupled plasma atomic emission spectroscopy (ICP-AES) analysis for Ru loading amount was determined by a Jarrell-Ash 1100 ICP-AES spectrometer.

### 2. Catalytic reactions

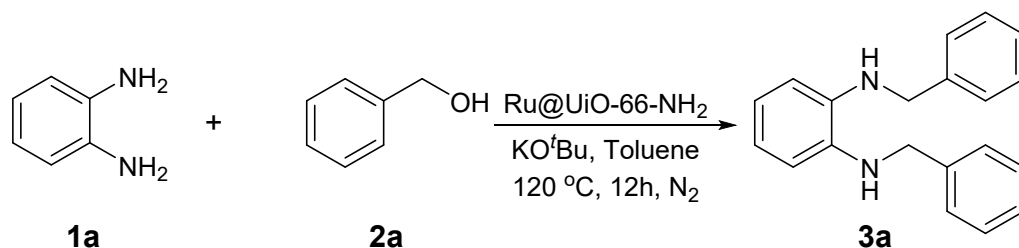

The mixture of 1,2-Phenylenediamine **1a** (1 mmol) and Benzyl alcohol **2a** (2 mmol), potassium tert-butoxide (0.5 mmol), and Ru@UiO-66-NH<sub>2</sub> were reacted in toluene (3 mL) at 120 °C for 12 h under N<sub>2</sub>. After the temperature was cooled to room temperature, the resulting solution was further purified by column chromatography.

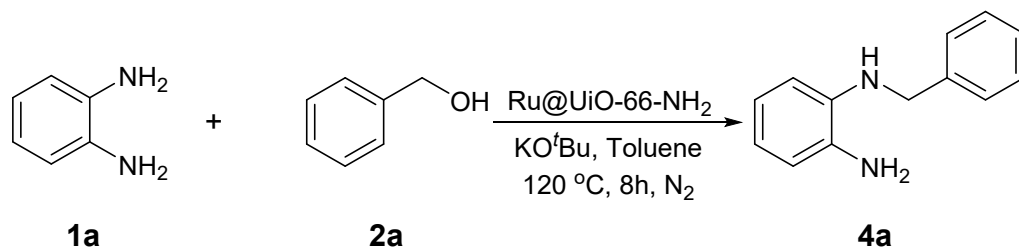

The mixture of 1,2-Phenylenediamine **1a** (4 mmol) and Benzyl alcohol **2a** (1 mmol), potassium tert-

butoxide (0.5 mmol), and Ru@UiO-66-NH<sub>2</sub> were reacted in toluene (3 mL) at 120 °C for 8 h under N<sub>2</sub>. After the temperature was cooled to room temperature, the resulting solution was further purified by column chromatography.

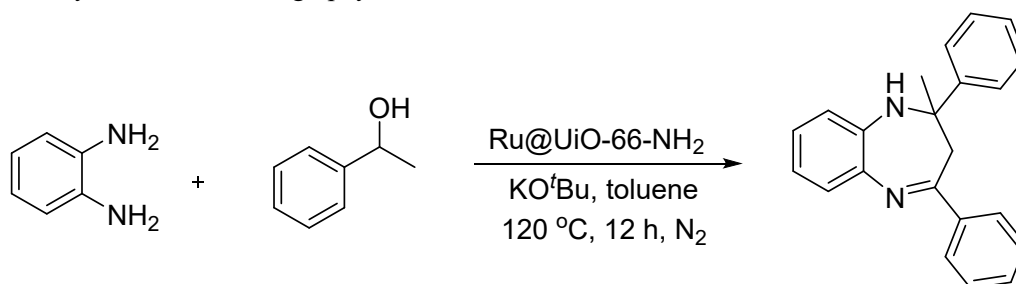

The mixture of 1,2-Phenylenediamine **1a** (1 mmol) and 1-phenylethanol (2 mmol), potassium tert-butoxide (1 mmol), and Ru@UiO-66-NH<sub>2</sub> were reacted in toluene (3 mL) at 120 °C for 12 h under N<sub>2</sub>. After the temperature was cooled to room temperature, the resulting solution was further purified by column chromatography.

### 3. Mechanism study

#### 3.1 Radical trapping experiment

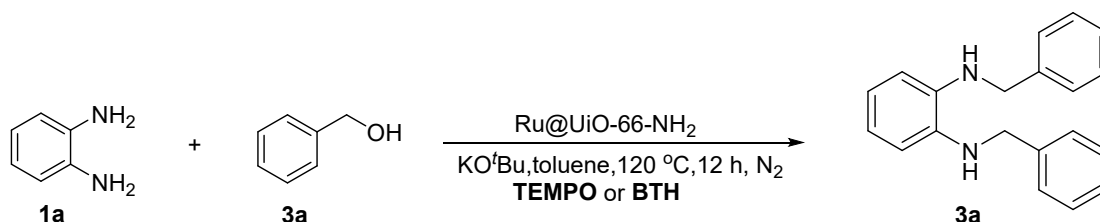

The mixture of 1,2-Phenylenediamine **1a** (1 mmol) and Benzyl alcohol **2a** (2 mmol), potassium tert-butoxide (0.5 mmol), TEMPO or BTH (1 mmol) and Ru@UiO-66-NH<sub>2</sub> were reacted in toluene (3 mL) at 120 °C for 12 h under N<sub>2</sub>. After the temperature was cooled to room temperature, the resulting solution was further purified by column chromatography.

#### 3.2 The effect of different substituents

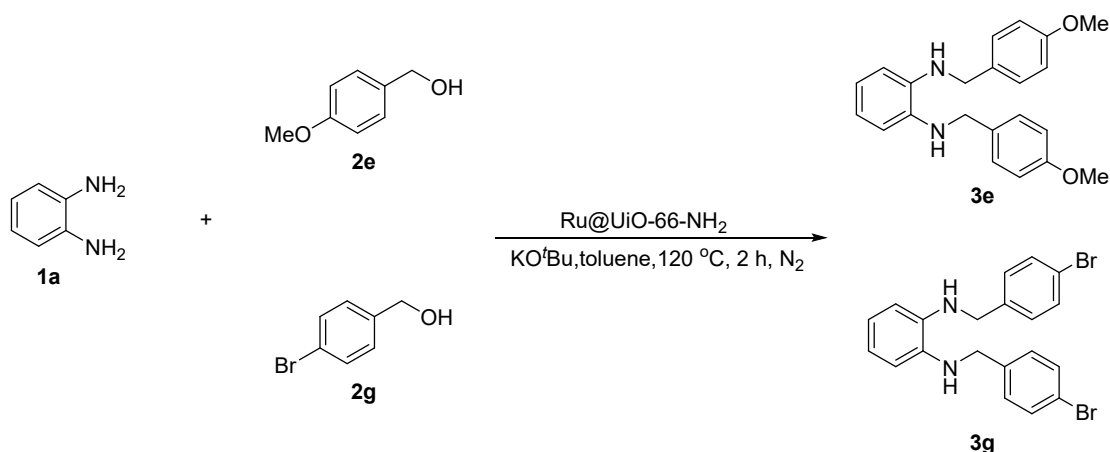

The mixture of 1,2-Phenylenediamine **1a** (1 mmol) and 4-methoxybenzyl alcohol **2e** (2 mmol), potassium tert-butoxide (0.5 mmol), and Ru@UiO-66-NH<sub>2</sub> were reacted in toluene (3 mL) at 120 °C for 2 h under N<sub>2</sub>. After the temperature was cooled to room temperature, the resulting solution was further purified by column chromatography.

The mixture of 1,2-Phenylenediamine **1a** (1 mmol) and 4-bromobenzyl alcohol **2g** (2 mmol), potassium tert-butoxide (0.5 mmol), and Ru@UiO-66-NH<sub>2</sub> were reacted in toluene (3 mL) at 120

°C for 2 h under N<sub>2</sub>. After the temperature was cooled to room temperature, the resulting solution was further purified by column chromatography.

### 3.3 Control experiments

1. The mixture of benzyl alcohol **2a** (2 mmol), potassium tert-butoxide (0.5 mmol), and Ru@UiO-66-NH<sub>2</sub> were reacted in toluene (3 mL) at 120 °C for 12 h under N<sub>2</sub>. After the temperature was cooled to room temperature, the resulting solution was further purified by column chromatography.
2. The mixture of 1,2-Phenylenediamine **1a** (1 mmol) and benzaldehyde **2a'** (2 mmol), potassium tert-butoxide (0.5 mmol), and Ru@UiO-66-NH<sub>2</sub> were reacted in toluene (3 mL) at 120 °C for 12 h under N<sub>2</sub>. After the temperature was cooled to room temperature, the resulting solution was further purified by column chromatography.
3. The mixture of *N*<sup>1</sup>, *N*<sup>2</sup>-(1,2-phenylene)-bis(1-phenylmethanimine) **6a** (1 mmol) and benzyl alcohol **2a** (2 mmol), potassium tert-butoxide (0.5 mmol), and Ru@UiO-66-NH<sub>2</sub> were reacted in toluene (3 mL) at 120 °C for 12 h under N<sub>2</sub>. After the temperature was cooled to room temperature, the resulting solution was further purified by column chromatography.
4. The mixture of 2-(benzylideneamino)-aniline **5a** (1 mmol) and benzyl alcohol **2a** (2 mmol), potassium tert-butoxide (0.5 mmol), and Ru@UiO-66-NH<sub>2</sub> were reacted in toluene (3 mL) at 120 °C for 12 h under N<sub>2</sub>. After the temperature was cooled to room temperature, the resulting solution was further purified by column chromatography.
5. The mixture of 2-(benzylideneamino)-aniline **5a** (4 mmol) and benzyl alcohol **2a** (1 mmol), potassium tert-butoxide (0.5 mmol), and Ru@UiO-66-NH<sub>2</sub> were reacted in toluene (3 mL) at 120 °C for 12 h under N<sub>2</sub>. After the temperature was cooled to room temperature, the resulting solution was further purified by column chromatography.

### 4. Reusability of the catalyst

To a 25 mL reaction tube was added the catalyst Ru@UiO-66-NH<sub>2</sub> (30 mg), KO<sup>t</sup>Bu (0.5 mmol), **1a** (1 mmol), **2a** (2 mmol). The mixture was heated at 120 °C for 12 h under N<sub>2</sub>. After the reaction mixture was cooled to room temperature, the catalyst was separated by centrifugation with ethyl acetate, washed with carrene, dried in a vacuum, and reused for the next time.

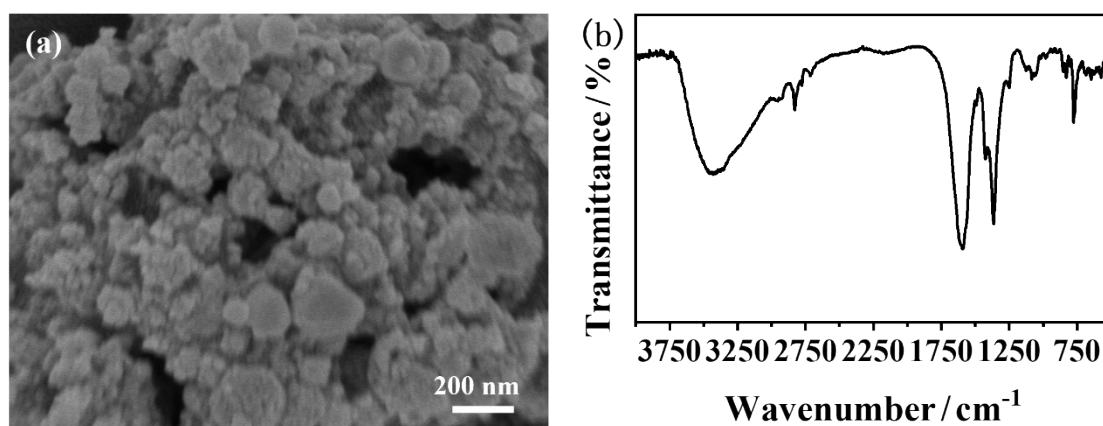

Fig. S1 (a) SEM image and (b) FT-IR spectra of recycled Ru@UiO-66-NH<sub>2</sub> with KO<sup>t</sup>Bu.

### 5. GC-MS

The mixture of 1,2-Phenylenediamine **1a** (1 mmol) and Benzyl alcohol **2a** (2 mmol), Potassium tert-butoxide (0.5 mmol), Ru@UiO-66-NH<sub>2</sub> (30 mg) were combined in toluene (2 mL) at 120 °C for 0.5 h under N<sub>2</sub>. The reaction mixture was cooled to room temperature, filtered with diatomite,

diluted with methanol and analyzed by GC-MS.

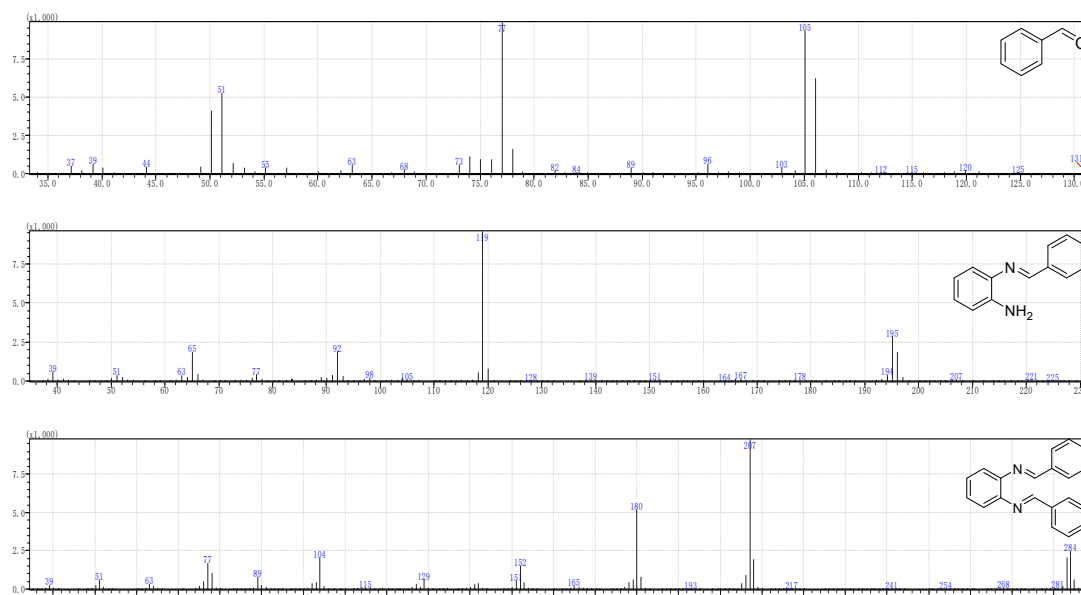

## 6. Analytical data of the obtained compounds

### (1) *N*<sup>1</sup>,*N*<sup>2</sup>-dibenzylbenzene-1,2-diamine(3a)<sup>1</sup>

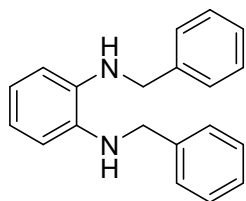

Yellow oil (239.0 mg, 0.83 mmol, 83%). <sup>1</sup>H NMR (400 MHz, CDCl<sub>3</sub>) δ 7.47 – 7.38 (m, 8H), 7.37 – 7.31 (m, 2H), 6.87 (dd, *J* = 5.8, 3.5 Hz, 2H), 6.79 (dd, *J* = 5.8, 3.5 Hz, 2H), 4.37 (s, 4H), 3.70 (s, 2H). <sup>13</sup>C NMR (101 MHz, CDCl<sub>3</sub>) δ 139.59, 137.31, 128.80, 128.01, 127.44, 119.62, 112.15, 48.96.

### (2) *N*<sup>1</sup>,*N*<sup>2</sup>-bis(4-methylbenzyl)benzene-1,2-diamine(3b)<sup>1</sup>

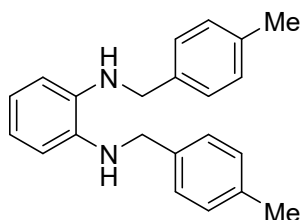

Yellow oil (265.4 mg, 0.84 mmol, 84%). <sup>1</sup>H NMR (400 MHz, CDCl<sub>3</sub>) δ 7.47 – 7.38 (m, 8H), 7.37 – 7.31 (m, 2H), 6.87 (dd, *J* = 5.8, 3.5 Hz, 2H), 6.79 (dd, *J* = 5.8, 3.5 Hz, 2H), 4.37 (s, 4H), 3.70 (s, 2H). <sup>13</sup>C NMR (101 MHz, CDCl<sub>3</sub>) δ 139.59, 137.31, 128.80, 128.01, 127.44, 119.62, 112.15, 48.96.

### (3) *N*<sup>1</sup>,*N*<sup>2</sup>-bis(3-methylbenzyl)benzene-1,2-diamine(3c)<sup>2</sup>

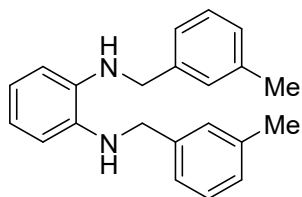

Yellow oil (224.3 mg, 0.71 mmol, 71%).  $^1\text{H NMR}$  (400 MHz,  $\text{CDCl}_3$ )  $\delta$  7.30 – 7.21 (m, 6H), 7.16 – 7.11 (m, 2H), 6.85 (dd,  $J = 5.8, 3.5$  Hz, 2H), 6.77 (dd,  $J = 5.8, 3.5$  Hz, 2H), 4.31 (s, 4H), 3.66 (s, 2H), 2.40 (s, 6H).  $^{13}\text{C NMR}$  (101 MHz,  $\text{CDCl}_3$ )  $\delta$  139.49, 138.42, 137.35, 128.84, 128.68, 128.21, 125.10, 119.51, 111.94, 48.97, 21.64.

**(4)  $N^1, N^2$ -bis(2-methylbenzyl)benzene-1,2-diamine(3d)<sup>2</sup>**

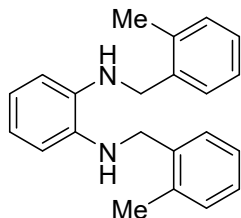

Yellow oil (214.9 mg, 0.68 mmol, 68%).  $^1\text{H NMR}$  (400 MHz,  $\text{CDCl}_3$ )  $\delta$  7.37 – 7.31 (m, 2H), 7.26 – 7.17 (m, 6H), 6.90 – 6.85 (m, 2H), 6.78 (dd,  $J = 5.8, 3.5$  Hz, 2H), 4.28 (s, 4H), 3.47 (s, 2H), 2.40 (s, 6H).  $^{13}\text{C NMR}$  (101 MHz,  $\text{CDCl}_3$ )  $\delta$  137.38, 137.16, 136.82, 130.57, 128.73, 127.63, 126.30, 119.49, 111.77, 46.93, 19.14.

**(5)  $N^1, N^2$ -bis(4-methoxybenzyl)benzene-1,2-diamine(3e)<sup>1</sup>**

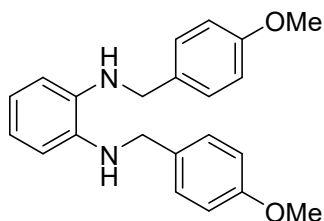

Yellow oil (285.3mg, 0.82 mmol, 82%).  $^1\text{H NMR}$  (400 MHz,  $\text{CDCl}_3$ )  $\delta$  7.33 (d,  $J = 8.7$  Hz, 4H), 6.95 – 6.88 (m, 4H), 6.84 (dd,  $J = 5.7, 3.4$  Hz, 2H), 6.76 (dd,  $J = 5.8, 3.5$  Hz, 2H), 4.26 (s, 4H), 3.83 (s, 6H), 3.58 (s, 1H).  $^{13}\text{C NMR}$  (101 MHz,  $\text{CDCl}_3$ )  $\delta$  158.97, 137.28, 131.53, 129.30, 119.46, 114.10, 111.88, 55.44, 48.36.

**(6)  $N^1, N^2$ -bis(3-methoxybenzyl)benzene-1,2-diamine(3f)**

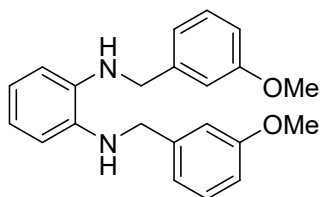

Yellow solid (261 mg, 0.75 mmol, 75%).  $^1\text{H NMR}$  (400 MHz,  $\text{CDCl}_3$ )  $\delta$  7.34 – 7.28 (m, 2H), 7.06 – 6.97 (m, 4H), 6.90 – 6.80 (m, 4H), 6.75 (dd,  $J = 5.8, 3.5$  Hz, 2H), 4.33 (s, 4H), 3.83 (s, 6H), 3.72 (s, 1H).  $^{13}\text{C NMR}$  (101 MHz,  $\text{CDCl}_3$ )  $\delta$  159.97, 141.28, 137.24, 129.80, 120.24, 119.59, 113.59, 112.71, 112.08, 55.35, 48.91.

**(7)  $N^1, N^2$ -bis(4-bromobenzyl)benzene-1,2-diamine(3g)<sup>3</sup>**

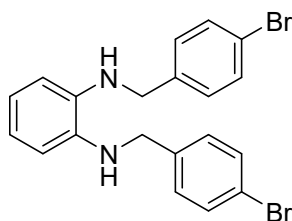

Yellow oil (325.6 mg, 0.73 mmol, 73%).  $^1\text{H NMR}$  (400 MHz,  $\text{CDCl}_3$ )  $\delta$  7.49 – 7.43 (m, 4H), 7.28

– 7.23 (m, 4H), 6.79 (dd,  $J = 5.8, 3.4$  Hz, 2H), 6.66 (dd,  $J = 5.8, 3.5$  Hz, 2H), 4.27 (s, 4H), 3.65 (s, 1H).  $^{13}\text{C}$  NMR (101 MHz,  $\text{CDCl}_3$ )  $\delta$  138.49, 136.94, 131.81, 129.52, 121.15, 119.83, 112.37, 48.24.  
**(8)  $N^1, N^2$ -bis(4-chlorobenzyl)benzene-1,2-diamine(3h)**<sup>3</sup>

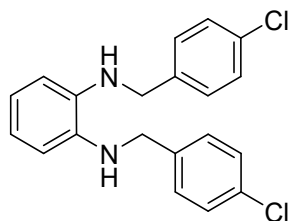

Yellow oil (267.7 mg, 0.75 mmol, 75%).  $^1\text{H}$  NMR (400 MHz,  $\text{CDCl}_3$ )  $\delta$  7.32 (s, 8H), 6.81 (dd,  $J = 5.8, 3.4$  Hz, 2H), 6.67 (dd,  $J = 5.8, 3.5$  Hz, 2H), 4.30 (s, 4H), 3.66 (s, 2H).  $^{13}\text{C}$  NMR (101 MHz,  $\text{CDCl}_3$ )  $\delta$  137.95, 136.95, 133.07, 129.20, 128.88, 119.79, 112.27, 48.18.

**(9)  $N^1, N^2$ -bis(4-(tert-butyl)benzyl)benzene-1,2-diamine(3i)**

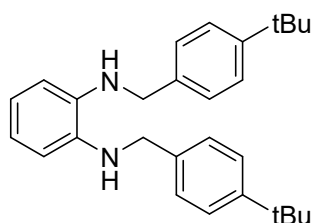

Yellow solid (348 mg, 0.87 mmol, 87%).  $^1\text{H}$  NMR (400 MHz,  $\text{CDCl}_3$ )  $\delta$  7.46 – 7.43 (m, 4H), 7.39 (d,  $J = 8.5$  Hz, 4H), 6.91 – 6.85 (m, 2H), 6.84 – 6.79 (m, 2H), 4.33 (s, 4H), 3.65 (s, 2H), 1.39 (s, 18H).  $^{13}\text{C}$  NMR (101 MHz,  $\text{CDCl}_3$ )  $\delta$  150.40, 137.39, 136.53, 127.98, 125.72, 119.50, 111.88, 48.64, 34.71, 31.60.

**(10)  $N^1, N^2$ -bis([1,1'-biphenyl]-4-ylmethyl)benzene-1,2-diamine(3j)**

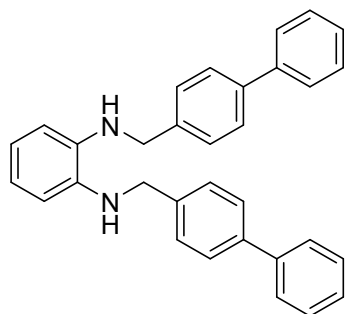

Yellow solid (277.2 mg, 0.63 mmol, 63%).  $^1\text{H}$  NMR (400 MHz,  $\text{CDCl}_3$ )  $\delta$  7.60 – 7.55 (m, 8H), 7.49 – 7.41 (m, 8H), 7.37 – 7.31 (m, 2H), 6.87 – 6.79 (m, 2H), 6.78 – 6.72 (m, 2H), 4.37 (s, 4H), 3.71 (s, 2H).  $^{13}\text{C}$  NMR (101 MHz,  $\text{CDCl}_3$ )  $\delta$  140.95, 140.36, 138.55, 137.23, 128.90, 128.40, 127.49, 127.38, 127.20, 119.61, 112.12, 48.60.

**(11)  $N^1, N^2$ -bis(3,5-dimethoxybenzyl)benzene-1,2-diamine(3k)**

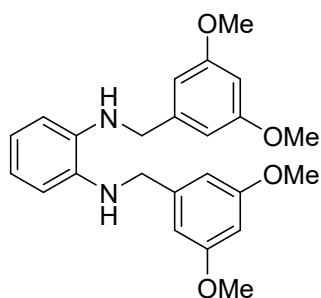

Yellow solid (350.9 mg, 0.86 mmol, 86%).  $^1\text{H}$  NMR (400 MHz,  $\text{CDCl}_3$ )  $\delta$  6.79 (dd,  $J = 5.8, 3.4$  Hz, 2H), 6.70 (dd,  $J = 5.8, 3.5$  Hz, 2H), 6.56 (d,  $J = 2.3$  Hz, 4H), 6.38 (t,  $J = 2.3$  Hz, 2H), 4.25 (s, 4H), 3.77 (s, 12H).  $^{13}\text{C}$  NMR (101 MHz,  $\text{CDCl}_3$ )  $\delta$  161.09, 142.09, 137.18, 119.61, 112.13, 105.81, 99.12, 55.44, 49.11.

**(12)  $N^1, N^2$ -bis(3,4,5-trimethoxybenzyl)benzene-1,2-diamine(3l)**

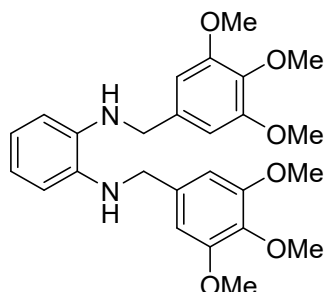

Yellow solid (248.0 mg, 0.53 mmol, 53%).  $^1\text{H}$  NMR (400 MHz,  $\text{CDCl}_3$ )  $\delta$  6.82 (dd,  $J = 5.8, 3.4$  Hz, 2H), 6.73 (dd,  $J = 5.8, 3.5$  Hz, 2H), 6.62 (s, 4H), 4.23 (s, 4H), 3.83 (d,  $J = 3.3$  Hz, 18H).  $^{13}\text{C}$  NMR (101 MHz,  $\text{CDCl}_3$ )  $\delta$  153.48, 137.19, 137.14, 135.22, 119.81, 112.30, 104.88, 61.01, 56.21, 49.54.

**(13)  $N^1, N^2$ -diphenethylbenzene-1,2-diamine(3m)<sup>4</sup>**

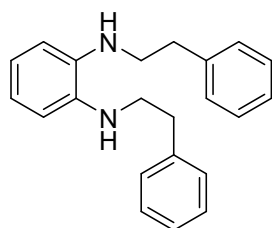

Yellow oil (212.2 mg, 0.68 mmol, 68%).  $^1\text{H}$  NMR (400 MHz,  $\text{CDCl}_3$ )  $\delta$  7.38 – 7.32 (m, 4H), 7.27 (td,  $J = 6.9, 1.6$  Hz, 6H), 6.82 (dd,  $J = 5.8, 3.5$  Hz, 2H), 6.72 (dd,  $J = 5.8, 3.5$  Hz, 2H), 3.35 (t,  $J = 7.0$  Hz, 4H), 2.95 (t,  $J = 7.0$  Hz, 4H).  $^{13}\text{C}$  NMR (101 MHz,  $\text{CDCl}_3$ )  $\delta$  139.67, 137.34, 128.94, 128.74, 126.57, 119.42, 112.00, 45.63, 35.99.

**(14)  $N^1, N^2$ -bis(benzo[d][1,3]dioxol-5-ylmethyl)benzene-1,2-diamine(3n)**

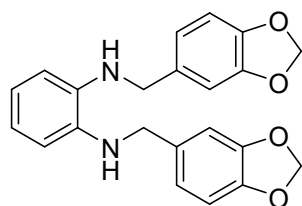

Yellow solid (302.4 mg, 0.80 mmol, 80%).  $^1\text{H}$  NMR (400 MHz,  $\text{CDCl}_3$ )  $\delta$  6.89 (d,  $J = 1.7$  Hz, 2H), 6.86 – 6.76 (m, 6H), 6.71 (dd,  $J = 5.7, 3.4$  Hz, 2H), 5.94 (s, 4H), 4.21 (s, 4H), 3.56 (s, 1H).  $^{13}\text{C}$  NMR (101 MHz,  $\text{CDCl}_3$ )  $\delta$  147.96, 146.89, 137.12, 133.39, 121.07, 119.58, 112.11, 108.52, 108.39, 101.10, 48.74.

**(15)  $N^1, N^2$ -bis(naphthalen-2-ylmethyl)benzene-1,2-diamine(3o)<sup>5</sup>**

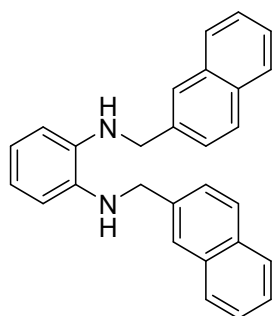

Yellow solid (287.1 mg, 0.74 mmol, 74%).  $^1\text{H NMR}$  (400 MHz,  $\text{CDCl}_3$ )  $\delta$  7.86 – 7.79 (m, 8H), 7.55 – 7.52 (m, 2H), 7.50 – 7.45 (m, 4H), 6.85 – 6.77 (m, 4H), 4.50 (s, 4H), 3.79 (s, 1H).  $^{13}\text{C NMR}$  (101 MHz,  $\text{CDCl}_3$ )  $\delta$  137.35, 137.05, 133.60, 132.91, 128.46, 127.90, 127.83, 126.38, 126.26, 126.23, 125.86, 119.69, 112.34, 49.15.

**(16) *N'*,*N*'-bis(naphthalen-1-ylmethyl)benzene-1,2-diamine(3p)**

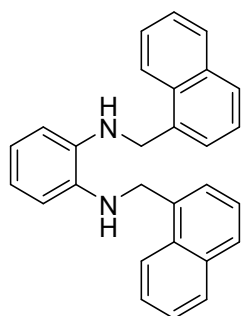

Yellow solid (248.3 mg, 0.64 mmol, 64%).  $^1\text{H NMR}$  (400 MHz,  $\text{CDCl}_3$ )  $\delta$  8.10 – 8.03 (m, 2H), 7.89 – 7.83 (m, 2H), 7.77 (d,  $J = 8.2$  Hz, 2H), 7.50 – 7.43 (m, 6H), 7.39 (dd,  $J = 8.2, 7.0$  Hz, 2H), 6.87 (d,  $J = 2.7$  Hz, 4H), 4.71 (s, 4H), 3.69 (s, 1H).  $^{13}\text{C NMR}$  (101 MHz,  $\text{CDCl}_3$ )  $\delta$  137.33, 134.53, 133.91, 131.83, 128.80, 128.23, 126.33, 126.26, 125.86, 125.59, 123.77, 119.66, 112.08, 46.86.

**(17) *N'*,*N*'-dibenzyl-4-chlorobenzene-1,2-diamine(3q)<sup>6</sup>**

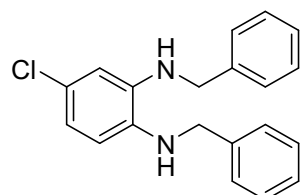

Yellow oil (258.0 mg, 0.80 mmol, 80%).  $^1\text{H NMR}$  (400 MHz,  $\text{CDCl}_3$ )  $\delta$  7.41 – 7.35 (m, 8H), 7.34 – 7.29 (m, 2H), 6.73 (dd,  $J = 8.3, 2.3$  Hz, 1H), 6.68 (d,  $J = 2.3$  Hz, 1H), 6.60 (d,  $J = 8.3$  Hz, 1H), 4.28 (s, 4H), 3.68 (s, 1H).  $^{13}\text{C NMR}$  (101 MHz,  $\text{CDCl}_3$ )  $\delta$  139.02, 138.76, 138.64, 135.36, 128.86, 128.80, 128.02, 127.93, 127.65, 127.54, 124.89, 118.57, 113.02, 111.76, 48.94, 48.71.

**(18) *N'*,*N*'-dibenzyl-4-bromobenzene-1,2-diamine(3r)**

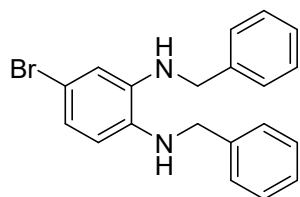

Yellow oil (238.5 mg, 0.65 mmol, 65%).  $^1\text{H NMR}$  (400 MHz,  $\text{CDCl}_3$ )  $\delta$  7.36 (ddd,  $J = 7.9, 3.8, 1.9$  Hz, 8H), 7.33 – 7.28 (m, 2H), 6.87 (dd,  $J = 8.3, 2.2$  Hz, 1H), 6.81 (d,  $J = 2.2$  Hz, 1H), 6.54 (d,  $J = 8.3$  Hz, 1H), 4.27 (d,  $J = 3.7$  Hz, 4H), 3.64 (s, 2H).  $^{13}\text{C NMR}$  (101 MHz,  $\text{CDCl}_3$ )  $\delta$  138.97, 138.76,



138.73, 135.96, 128.86, 128.80, 128.07, 127.88, 127.66, 127.53, 121.69, 114.51, 113.35, 112.13, 48.81, 48.76.

**(19) *N*<sup>1</sup>,*N*<sup>2</sup>-dibenzyl-4-methylbenzene-1,2-diamine(3s)<sup>6</sup>**

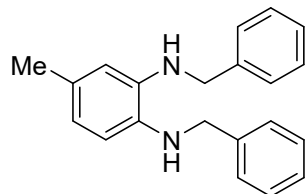

Yellow oil (244.6 mg, 0.81 mmol, 81%). <sup>1</sup>H NMR (400 MHz, CDCl<sub>3</sub>) δ 7.53 – 7.34 (m, 10H), 6.76 – 6.67 (m, 2H), 6.66 (d, *J* = 1.8 Hz, 1H), 4.38 (d, *J* = 8.9 Hz, 4H), 3.66 (s, 1H), 2.37 (s, 3H). <sup>13</sup>C NMR (101 MHz, CDCl<sub>3</sub>) δ 139.82, 139.72, 137.87, 134.62, 129.38, 128.85, 128.80, 128.11, 128.05, 127.48, 127.42, 119.46, 112.84, 112.77, 49.30, 48.95, 21.40.

**(20) *N*<sup>1</sup>,*N*<sup>2</sup>-dimethylbenzene-1,2-diamine (3t)<sup>1</sup>**

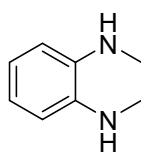

Black solid (34.1 mg, 0.25 mmol, 25%). <sup>1</sup>H NMR (400 MHz, CDCl<sub>3</sub>) δ 6.84 (ddd, *J* = 5.8, 3.5, 1.2 Hz, 2H), 6.69 (ddd, *J* = 5.6, 3.5, 1.1 Hz, 2H), 2.86 (s, 6H). <sup>13</sup>C NMR (101 MHz, CDCl<sub>3</sub>) δ 138.44, 119.17, 110.58, 31.15.

**(21) *N*<sup>1</sup>,*N*<sup>2</sup>-diethylbenzene-1,2-diamine (3u)<sup>1</sup>**

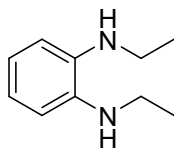

Black solid (52.5 mg, 0.32 mmol, 32%). <sup>1</sup>H NMR (400 MHz, CDCl<sub>3</sub>) δ 6.80 (dd, *J* = 5.8, 3.4 Hz, 2H), 6.68 (dd, *J* = 5.8, 3.5 Hz, 2H), 3.17 – 3.12 (m, 4H), 1.31 (t, *J* = 7.1 Hz, 6H). <sup>13</sup>C NMR (101 MHz, CDCl<sub>3</sub>) δ 137.44, 119.11, 111.47, 38.92, 15.16.

**(22) *N*<sup>1</sup>,*N*<sup>4</sup>-dibenzylbenzene-1,4-diamine (3v)<sup>1</sup>**

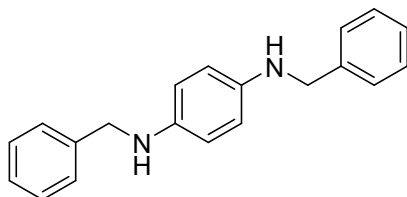

Yellow solid (252.6 mg, 0.89 mmol, 89%). <sup>1</sup>H NMR (400 MHz, CDCl<sub>3</sub>) δ 7.41 – 7.32 (m, 8H), 7.31 – 7.25 (m, 2H), 6.59 (d, *J* = 0.9 Hz, 4H), 4.27 (s, 4H). <sup>13</sup>C NMR (101 MHz, CDCl<sub>3</sub>) δ 140.88, 140.09, 128.67, 127.74, 127.21, 114.80, 49.63.

**(23) *N*<sup>1</sup>,*N*<sup>3</sup>-bis(4-methoxybenzyl)benzene-1,3-diamine (3w)<sup>1</sup>**

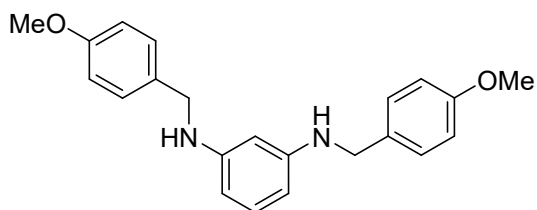

Yellow solid (289.2 mg, 0.83 mmol, 83%).  $^1\text{H}$  NMR (400 MHz,  $\text{CDCl}_3$ )  $\delta$  7.30 – 7.23 (m, 4H), 7.00 (d,  $J = 8.0$  Hz, 1H), 6.87 (d,  $J = 8.7$  Hz, 4H), 6.06 (dd,  $J = 8.0, 2.2$  Hz, 2H), 5.92 (t,  $J = 2.2$  Hz, 1H), 4.20 (s, 4H), 3.80 (s, 6H).  $^{13}\text{C}$  NMR (101 MHz,  $\text{CDCl}_3$ )  $\delta$  158.88, 149.53, 131.77, 130.11, 128.93, 114.08, 103.11, 97.30, 55.40, 47.91.

**(24) *N'*-benzylbenzene-1,2-diamine (4a)**<sup>7</sup>

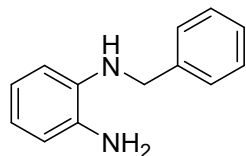

Brown oil (180.2 mg, 0.91 mmol, 91%).  $^1\text{H}$  NMR (400 MHz,  $\text{CDCl}_3$ )  $\delta$  7.43 – 7.30 (m, 4H), 7.29 – 7.24 (m, 1H), 6.79 (ddd,  $J = 7.7, 6.0, 3.0$  Hz, 1H), 6.73 – 6.56 (m, 3H), 4.27 (s, 2H), 3.36 (s, 3H).  $^{13}\text{C}$  NMR (101 MHz,  $\text{CDCl}_3$ )  $\delta$  139.52, 137.75, 134.28, 128.68, 127.87, 127.33, 120.80, 118.93, 116.63, 112.13, 48.72.

**(25) *N'*-(4-methylbenzyl)benzene-1,2-diamine (4b)**<sup>7</sup>

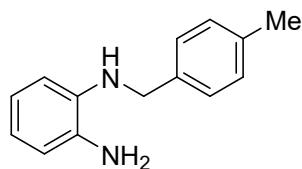

Brown oil (195.0 mg, 0.92 mmol, 92%).  $^1\text{H}$  NMR (400 MHz,  $\text{CDCl}_3$ )  $\delta$  7.27 (d,  $J = 7.8$  Hz, 2H), 7.14 (d,  $J = 7.8$  Hz, 2H), 6.83 – 6.75 (m, 1H), 6.69 (tdd,  $J = 7.8, 7.3, 1.9$  Hz, 3H), 4.25 (s, 2H), 3.37 (s, 3H), 2.34 (s, 3H).  $^{13}\text{C}$  NMR (101 MHz,  $\text{CDCl}_3$ )  $\delta$  137.84, 136.93, 136.45, 134.23, 129.33, 127.83, 120.76, 118.81, 116.53, 112.04, 48.46, 21.16.

**(26) *N'*-(4-(methylthio)benzyl)benzene-1,2-diamine (4c)**

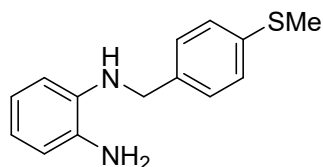

Brown oil (178.1 mg, 0.73 mmol, 73%).  $^1\text{H}$  NMR (400 MHz,  $\text{CDCl}_3$ )  $\delta$  7.31 (d,  $J = 8.3$  Hz, 2H), 7.24 (d,  $J = 8.4$  Hz, 2H), 6.79 (td,  $J = 7.4, 1.9$  Hz, 1H), 6.72 (ddd,  $J = 13.4, 7.5, 1.7$  Hz, 2H), 6.65 (dd,  $J = 7.8, 1.4$  Hz, 1H), 4.27 (s, 2H), 3.37 (s, 3H), 2.48 (s, 3H).  $^{13}\text{C}$  NMR (101 MHz,  $\text{CDCl}_3$ )  $\delta$  137.50, 137.26, 136.35, 134.24, 128.33, 127.04, 120.77, 119.02, 116.65, 112.20, 48.23, 16.08.

**(27) *N'*-(4-(*tert*-butyl)benzyl)benzene-1,2-diamine (4d)**

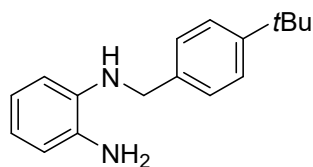

Brown oil (238.8 mg, 0.94 mmol, 94%).  $^1\text{H}$  NMR (400 MHz,  $\text{CDCl}_3$ )  $\delta$  7.37 (d,  $J = 8.5$  Hz, 2H), 7.32 (d,  $J = 8.2$  Hz, 2H), 6.80 (ddd,  $J = 8.6, 6.5, 2.1$  Hz, 1H), 6.73 – 6.66 (m, 3H), 4.26 (s, 2H), 3.41 (s, 3H), 1.32 (s, 9H).  $^{13}\text{C}$  NMR (101 MHz,  $\text{CDCl}_3$ )  $\delta$  150.30, 137.88, 136.44, 134.25, 127.70, 125.57, 120.76, 118.83, 116.53, 112.01, 48.40, 34.56, 31.45.

**(28) *N'*-(4-isopropylbenzyl)benzene-1,2-diamine (4e)**

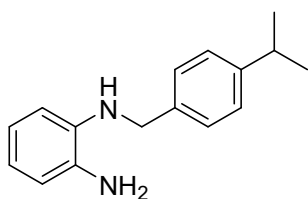

Brown oil (220.8 mg, 0.92 mmol, 92%). <sup>1</sup>H NMR (400 MHz, CDCl<sub>3</sub>) δ 7.30 (d, *J* = 8.0 Hz, 2H), 7.22 – 7.17 (m, 2H), 6.79 (ddd, *J* = 8.5, 5.6, 3.2 Hz, 1H), 6.68 (dd, *J* = 5.5, 2.1 Hz, 3H), 4.24 (s, 2H), 3.35 (s, 3H), 2.89 (p, *J* = 6.9 Hz, 1H), 1.24 (d, *J* = 6.9 Hz, 6H). <sup>13</sup>C NMR (101 MHz, CDCl<sub>3</sub>) δ 148.06, 137.87, 136.85, 134.29, 128.00, 126.74, 120.77, 118.86, 116.55, 112.05, 48.52, 33.91, 24.13.

**(29) *N*'-(4-fluorobenzyl)benzene-1,2-diamine (4f)<sup>7</sup>**

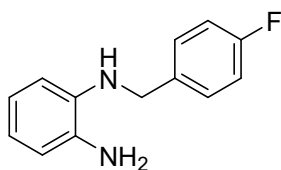

Yellow oil (179.3 mg, 0.83 mmol, 83%). <sup>1</sup>H NMR (400 MHz, CDCl<sub>3</sub>) δ 7.38 – 7.31 (m, 2H), 7.04 – 6.99 (m, 2H), 6.79 (td, *J* = 7.4, 2.0 Hz, 1H), 6.76 – 6.66 (m, 2H), 6.63 (dd, *J* = 7.8, 1.3 Hz, 1H), 4.27 (s, 2H), 3.44 (s, 3H). <sup>13</sup>C NMR (101 MHz, CDCl<sub>3</sub>) δ 162.11 (d, *J* = 245.0 Hz), 137.54, 135.14 (d, *J* = 3.1 Hz), 134.25, 129.31 (d, *J* = 7.9 Hz), 120.79, 119.06, 116.70, 115.43 (d, *J* = 21.3 Hz), 112.13, 47.96.

**(30) *N*'-(4-chlorobenzyl)benzene-1,2-diamine (4g)<sup>8</sup>**

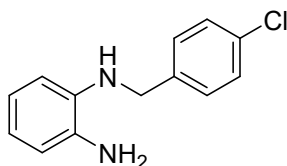

Brown oil (177.2 mg, 0.85 mmol, 85%). <sup>1</sup>H NMR (400 MHz, CDCl<sub>3</sub>) δ 7.20 (s, 4H), 6.74 – 6.45 (m, 4H), 4.17 (s, 2H), 3.39 (s, 3H). <sup>13</sup>C NMR (101 MHz, CDCl<sub>3</sub>) δ 138.05, 137.47, 134.25, 132.95, 129.03, 128.77, 120.84, 119.13, 116.78, 112.17, 47.94.

**(31) *N*'-(3-methylbenzyl)benzene-1,2-diamine (4h)<sup>7</sup>**

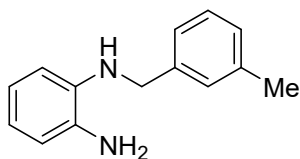

Brown oil (188.7 mg, 0.89 mmol, 89%). <sup>1</sup>H NMR (400 MHz, CDCl<sub>3</sub>) δ 7.25 – 7.15 (m, 3H), 7.08 (d, *J* = 7.3 Hz, 1H), 6.79 (ddd, *J* = 7.1, 5.9, 2.7 Hz, 1H), 6.73 – 6.63 (m, 3H), 4.23 (s, 2H), 2.34 (s, 3H). <sup>13</sup>C NMR (101 MHz, CDCl<sub>3</sub>) δ 139.47, 138.32, 137.87, 134.26, 128.66, 128.60, 128.11, 124.96, 120.81, 118.87, 116.59, 112.07, 48.77, 21.51.

**(32) *N*'-(3-methoxybenzyl)benzene-1,2-diamine (4i)<sup>9</sup>**

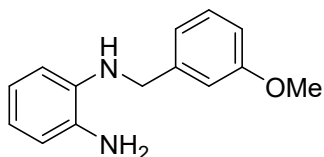

Brown oil (205.2 mg, 0.90 mmol, 90%). <sup>1</sup>H NMR (400 MHz, CDCl<sub>3</sub>) δ 7.23 – 7.18 (m, 1H), 6.92 (dd, *J* = 7.6, 1.6 Hz, 2H), 6.81 – 6.72 (m, 2H), 6.63 (tt, *J* = 8.5, 6.7 Hz, 3H), 4.19 (s, 2H), 3.71 (s, 3H), 3.36 (s, 3H). <sup>13</sup>C NMR (101 MHz, CDCl<sub>3</sub>) δ 160.04, 141.39, 137.78, 134.39, 129.77, 120.80, 120.17, 118.97, 116.67, 113.58, 112.73, 112.17, 55.33, 48.72.

**(33) *N*'-(3-bromobenzyl)benzene-1,2-diamine (4j)**<sup>9</sup>

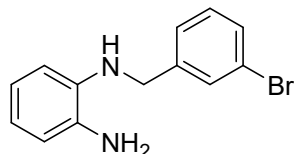

Brown oil (223.5 mg, 0.81 mmol, 81%). <sup>1</sup>H NMR (400 MHz, CDCl<sub>3</sub>) δ 7.41 (s, 1H), 7.27 (d, *J* = 8.1 Hz, 1H), 7.15 (d, *J* = 7.7 Hz, 1H), 7.05 (t, *J* = 7.8 Hz, 1H), 6.67 (dt, *J* = 8.1, 4.3 Hz, 1H), 6.58 (d, *J* = 4.5 Hz, 2H), 6.47 (d, *J* = 7.7 Hz, 1H), 4.11 (s, 2H), 3.39 (s, 3H). <sup>13</sup>C NMR (101 MHz, CDCl<sub>3</sub>) δ 142.10, 137.43, 134.32, 130.69, 130.40, 130.26, 126.28, 122.81, 120.88, 119.21, 116.85, 112.20, 48.07.

**(34) *N*'-(2-methylbenzyl)benzene-1,2-diamine (4k)**<sup>7</sup>

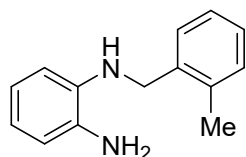

Brown oil (182.3 mg, 0.86 mmol, 86%). <sup>1</sup>H NMR (400 MHz, CDCl<sub>3</sub>) δ 7.27 (d, *J* = 7.0 Hz, 1H), 7.18 – 7.10 (m, 3H), 6.82 – 6.74 (m, 1H), 6.68 – 6.60 (m, 3H), 4.18 (s, 2H), 3.27 (s, 3H), 2.33 (s, 3H). <sup>13</sup>C NMR (101 MHz, CDCl<sub>3</sub>) δ 137.98, 137.35, 136.66, 134.36, 130.57, 128.61, 127.59, 126.33, 120.86, 118.90, 116.63, 111.97, 46.74, 19.10.

**(35) *N*'-phenethylbenzene-1,2-diamine (4l)**<sup>10</sup>

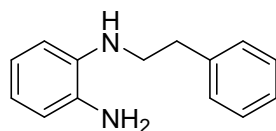

Brown oil (186.6 mg, 0.88 mmol, 88%). <sup>1</sup>H NMR (400 MHz, CDCl<sub>3</sub>) δ 7.29 (t, *J* = 7.4 Hz, 2H), 7.21 (d, *J* = 7.3 Hz, 3H), 6.84 – 6.77 (m, 1H), 6.70 – 6.59 (m, 3H), 3.34 (t, *J* = 7.1 Hz, 2H), 3.23 (s, 3H), 2.91 (t, *J* = 7.1 Hz, 2H). <sup>13</sup>C NMR (101 MHz, CDCl<sub>3</sub>) δ 139.62, 137.64, 134.47, 128.88, 128.71, 126.52, 120.78, 118.82, 116.64, 112.06, 45.50, 35.89.

**(36) *N*'-(3,5-dimethoxybenzyl)benzene-1,2-diamine (4m)**

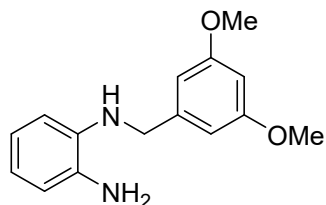

Brown oil (221.9 mg, 0.86 mmol, 86%). <sup>1</sup>H NMR (400 MHz, CDCl<sub>3</sub>) δ 6.77 (td, *J* = 7.1, 2.6 Hz, 1H), 6.71 – 6.65 (m, 2H), 6.63 (d, *J* = 7.9 Hz, 1H), 6.55 (d, *J* = 2.3 Hz, 2H), 6.37 (t, *J* = 2.4 Hz, 1H), 4.21 (s, 2H), 3.75 (s, 6H), 3.40 (s, 3H). <sup>13</sup>C NMR (101 MHz, CDCl<sub>3</sub>) δ 161.07, 142.02, 137.68, 134.22, 120.78, 118.93, 116.61, 112.14, 105.73, 99.16, 55.36, 48.91.

**(37) *N*'-([1,1'-biphenyl]-4-ylmethyl)benzene-1,2-diamine (4n)**<sup>11</sup>

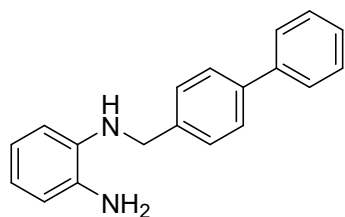

Brown oil (230.2 mg, 0.84 mmol, 84%).  $^1\text{H}$  NMR (400 MHz,  $\text{CDCl}_3$ )  $\delta$  7.61 – 7.56 (m, 4H), 7.48 – 7.41 (m, 4H), 7.37 – 7.32 (m, 1H), 6.84 – 6.78 (m, 1H), 6.77 – 6.66 (m, 3H), 4.36 (s, 2H), 3.41 (s, 3H).  $^{13}\text{C}$  NMR (101 MHz,  $\text{CDCl}_3$ )  $\delta$  140.90, 140.28, 138.54, 137.74, 134.23, 128.79, 128.20, 127.37, 127.27, 127.09, 120.80, 118.92, 116.63, 112.10, 48.37.

**(38) *N'*-(benzo[*d*][1,3]dioxol-5-ylmethyl)benzene-1,2-diamine (4o)**

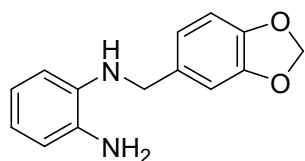

Brown oil (210.5 mg, 0.87 mmol, 87%).  $^1\text{H}$  NMR (400 MHz,  $\text{CDCl}_3$ )  $\delta$  6.86 (d,  $J = 1.7$  Hz, 1H), 6.83 – 6.73 (m, 3H), 6.70 – 6.65 (m, 2H), 6.64 – 6.61 (m, 1H), 5.89 (s, 2H), 4.17 (s, 2H), 3.36 (s, 3H).  $^{13}\text{C}$  NMR (101 MHz,  $\text{CDCl}_3$ )  $\delta$  147.93, 146.81, 137.65, 134.30, 133.45, 120.93, 120.75, 118.95, 116.61, 112.11, 108.39, 108.34, 101.05, 48.50.

**(39) *N'*-(naphthalen-2-ylmethyl)benzene-1,2-diamine (4p)**

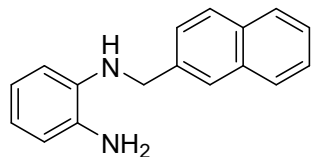

Brown oil (188.5 mg, 0.76 mmol, 76%).  $^1\text{H}$  NMR (400 MHz,  $\text{CDCl}_3$ )  $\delta$  7.83 – 7.78 (m, 4H), 7.50 – 7.42 (m, 3H), 6.79 (ddd,  $J = 8.1, 6.7, 2.0$  Hz, 1H), 6.75 – 6.67 (m, 3H), 4.45 (s, 2H), 3.42 (s, 3H).  $^{13}\text{C}$  NMR (101 MHz,  $\text{CDCl}_3$ )  $\delta$  137.77, 136.98, 134.26, 133.55, 132.85, 128.36, 127.82, 127.75, 126.23, 126.18, 126.09, 125.78, 120.85, 118.97, 116.69, 112.22, 48.87.

**(40) 2-methyl-2,4-diphenyl-2,3-dihydro-1*H*-benzo[*b*][1,4]diazepine**

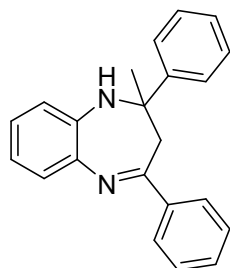

Yellow solid (224.9 mg, 0.72 mmol, 72%).  $^1\text{H}$  NMR (400 MHz,  $\text{CDCl}_3$ )  $\delta$  7.59 (tt,  $J = 7.4, 1.6$  Hz, 4H), 7.32 – 7.15 (m, 7H), 7.06 (ddd,  $J = 8.2, 7.2, 1.9$  Hz, 2H), 6.86 – 6.81 (m, 1H), 3.14 (d,  $J = 13.2$  Hz, 1H), 2.97 (d,  $J = 13.2$  Hz, 1H), 1.76 (s, 3H).  $^{13}\text{C}$  NMR (101 MHz,  $\text{CDCl}_3$ )  $\delta$  167.84, 147.71, 140.17, 139.67, 138.18, 129.86, 128.72, 128.68, 128.42, 128.14, 127.18, 126.46, 125.54, 121.77, 121.53, 73.83, 43.18, 29.98.

## 7. NMR spectra of obtained compounds

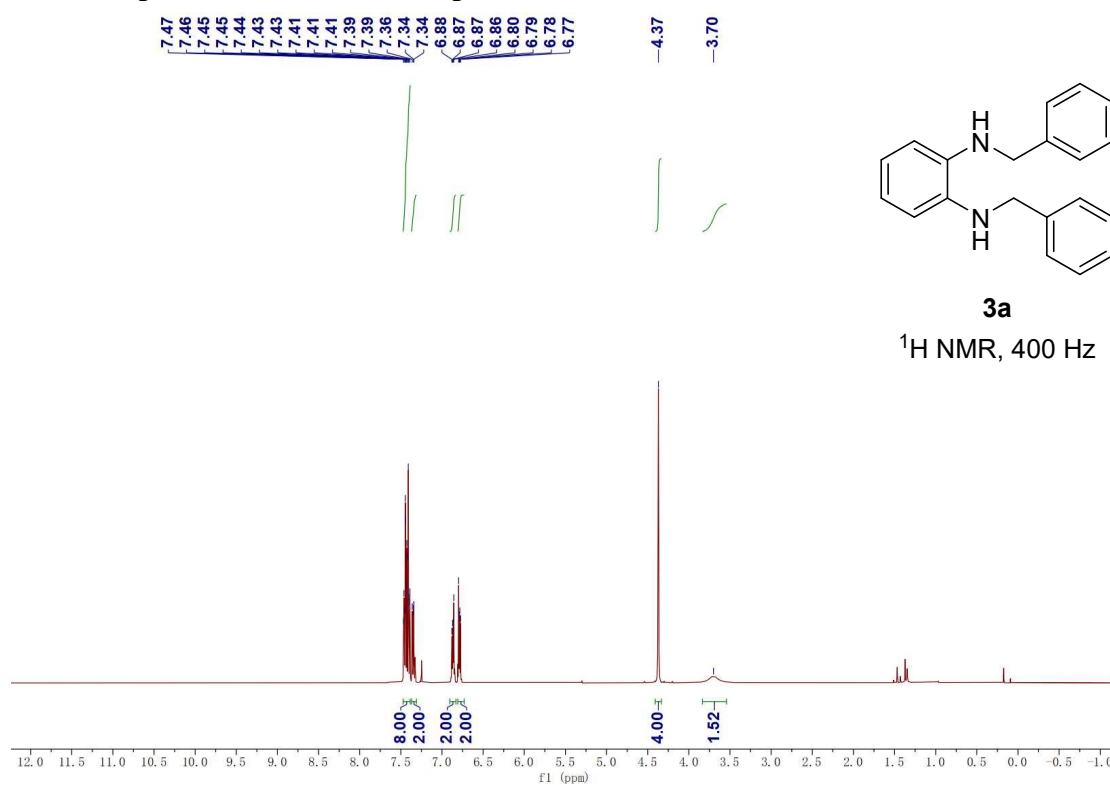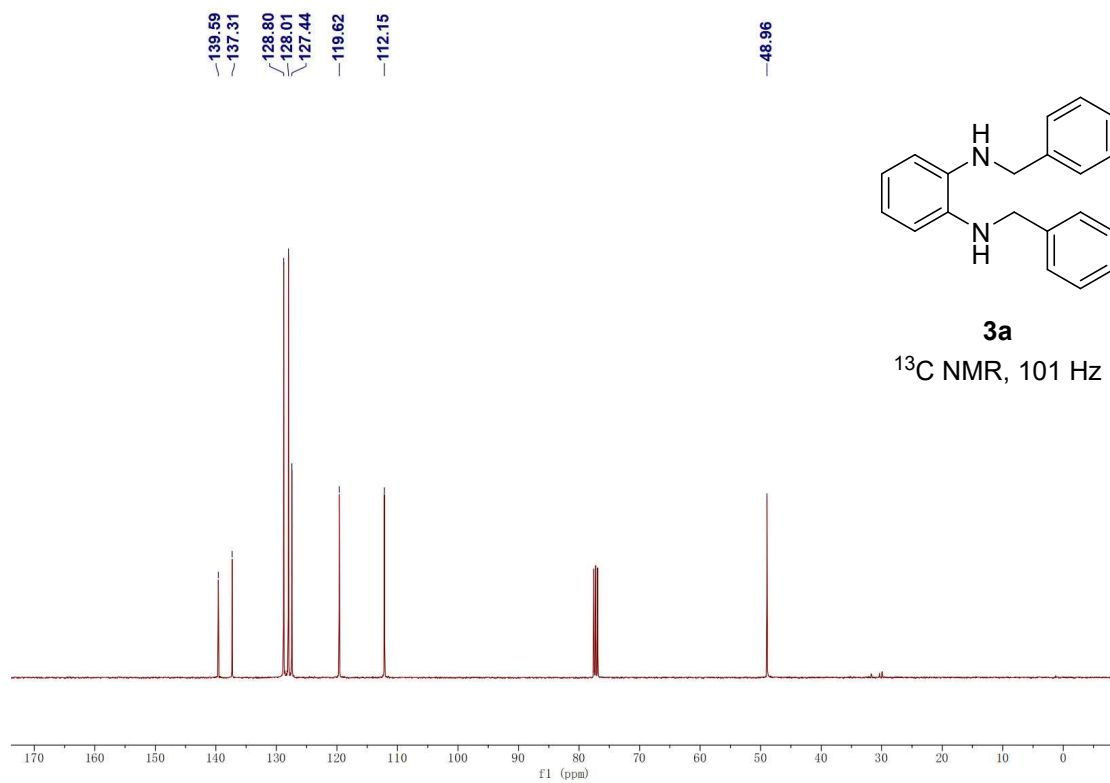

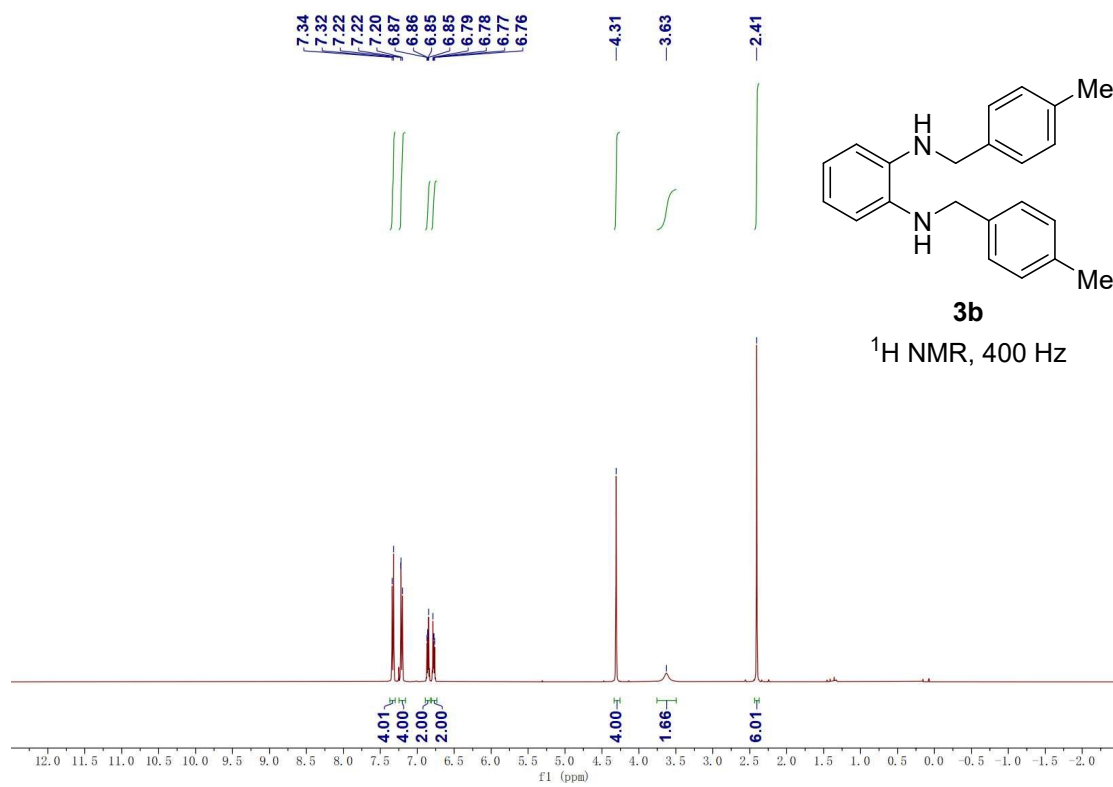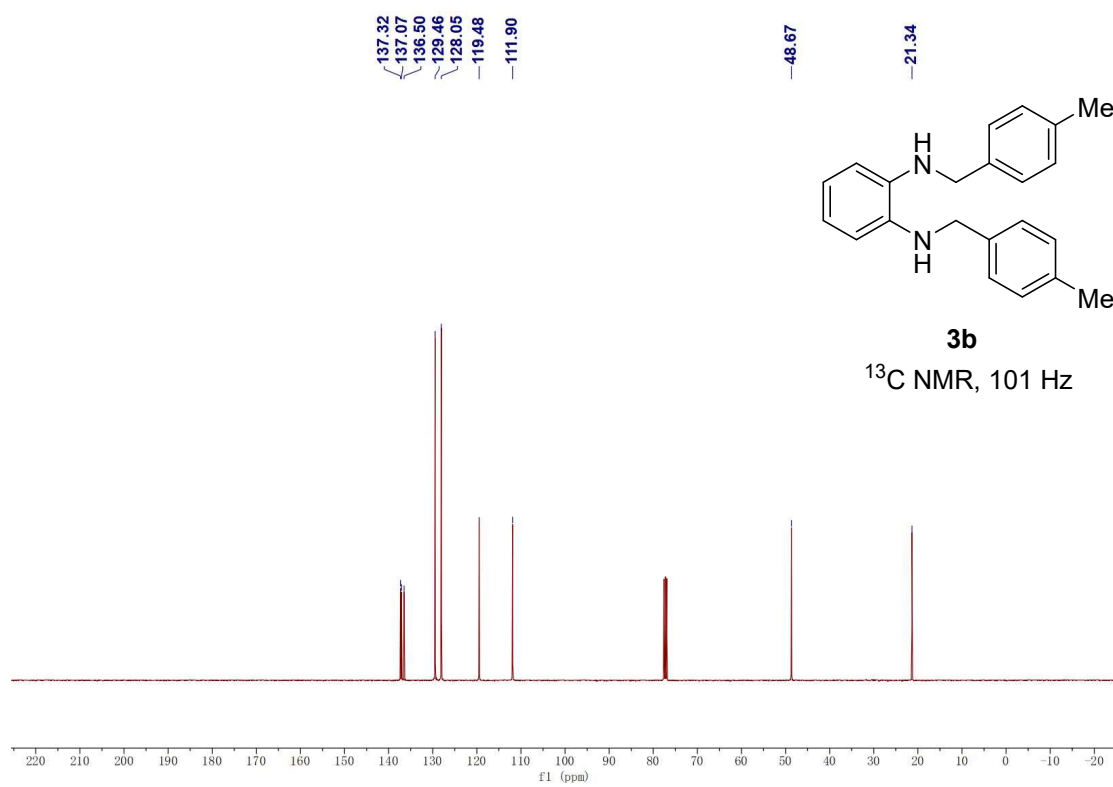

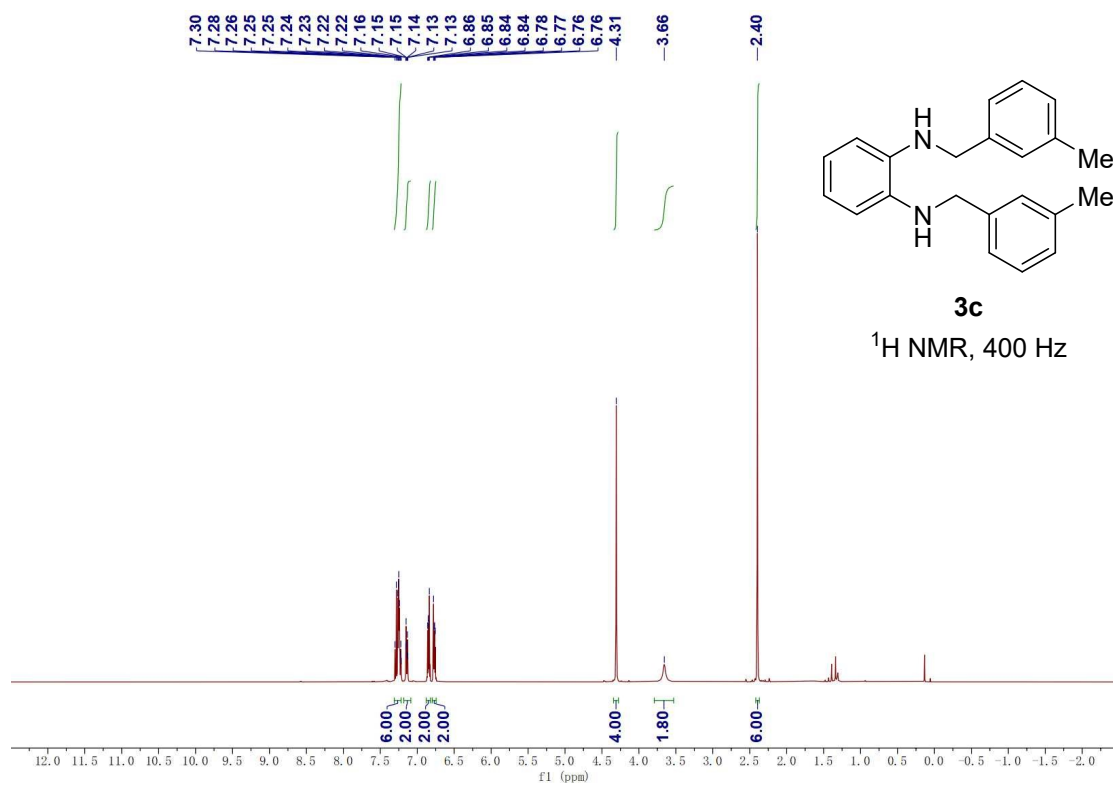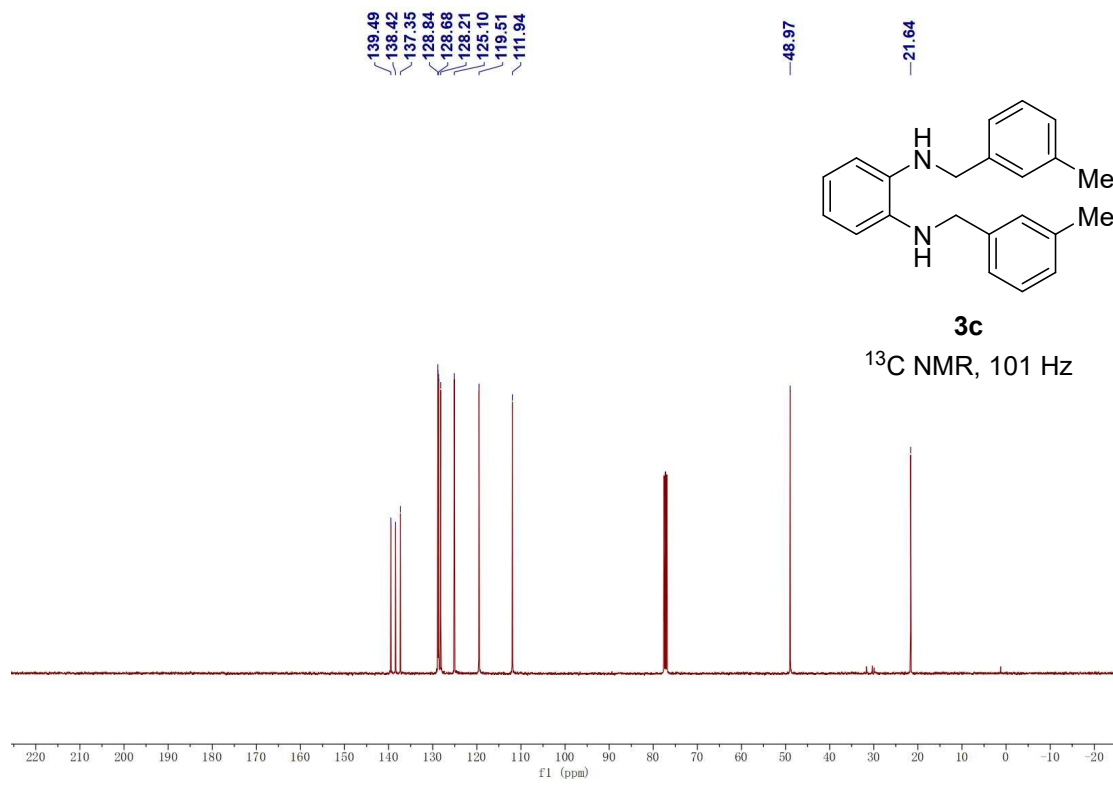



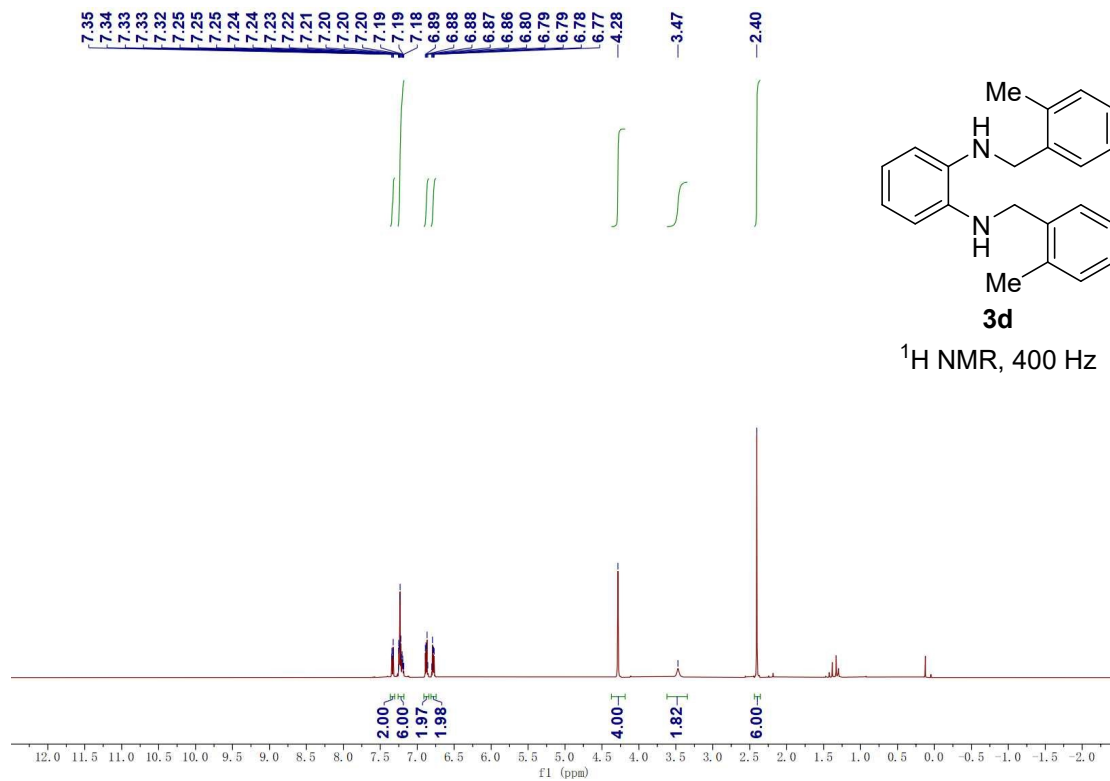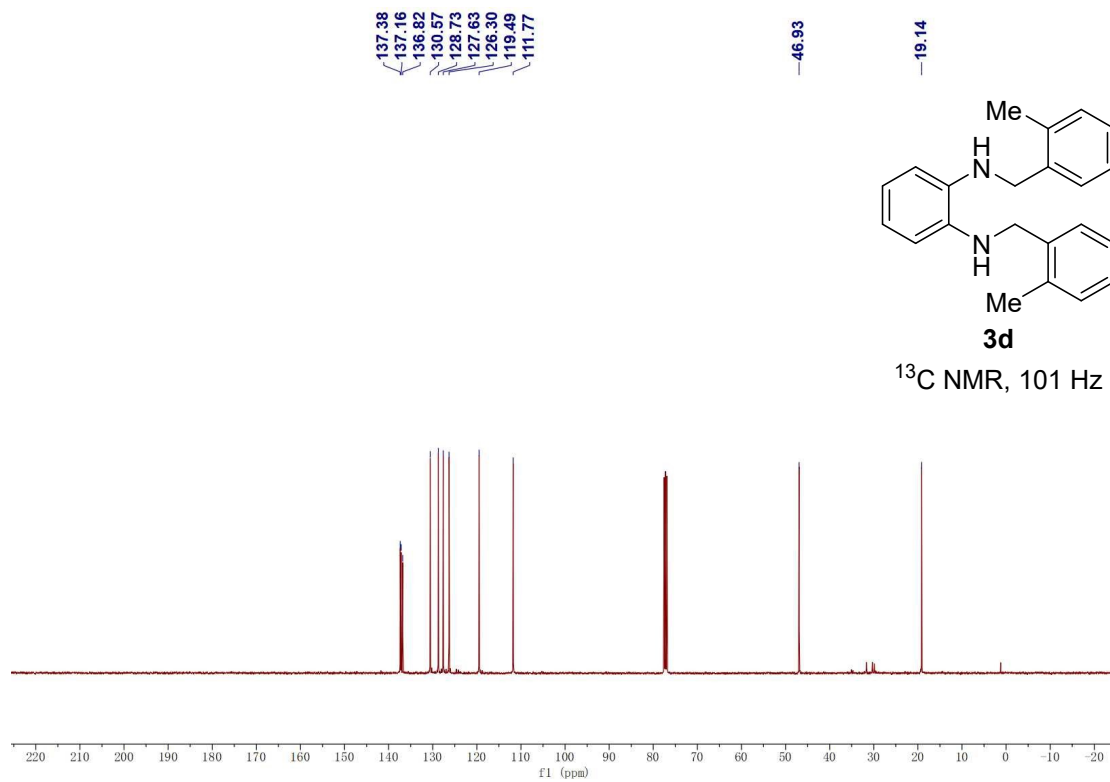

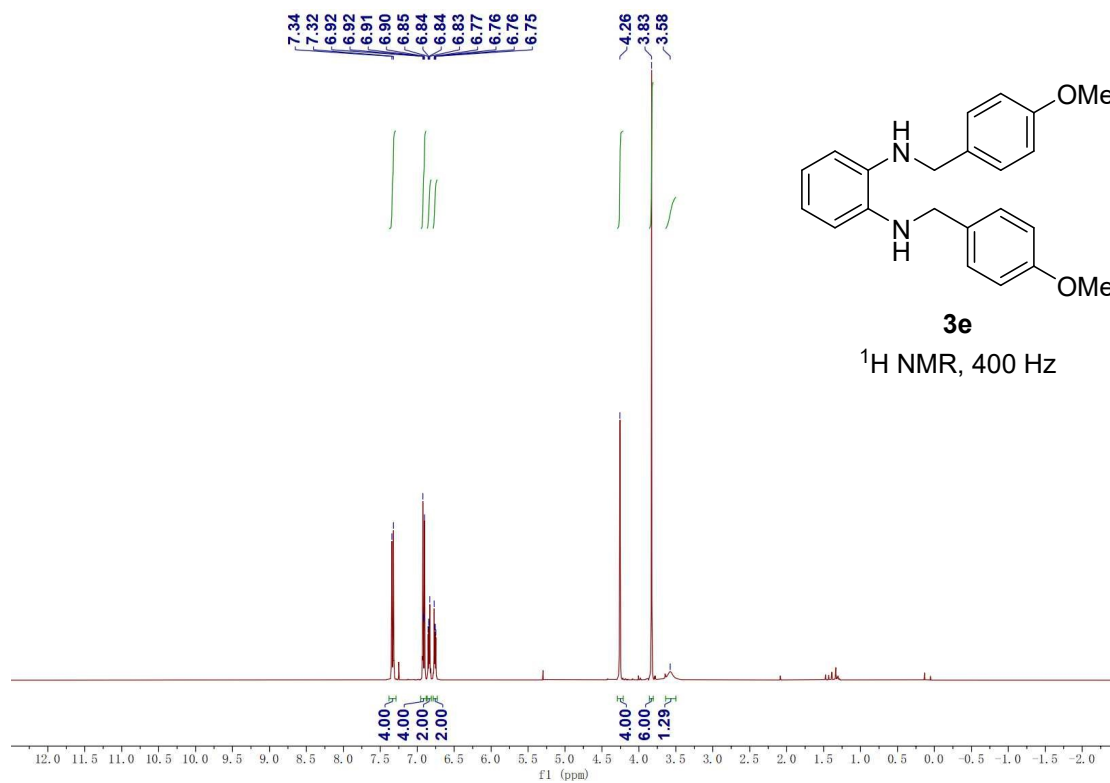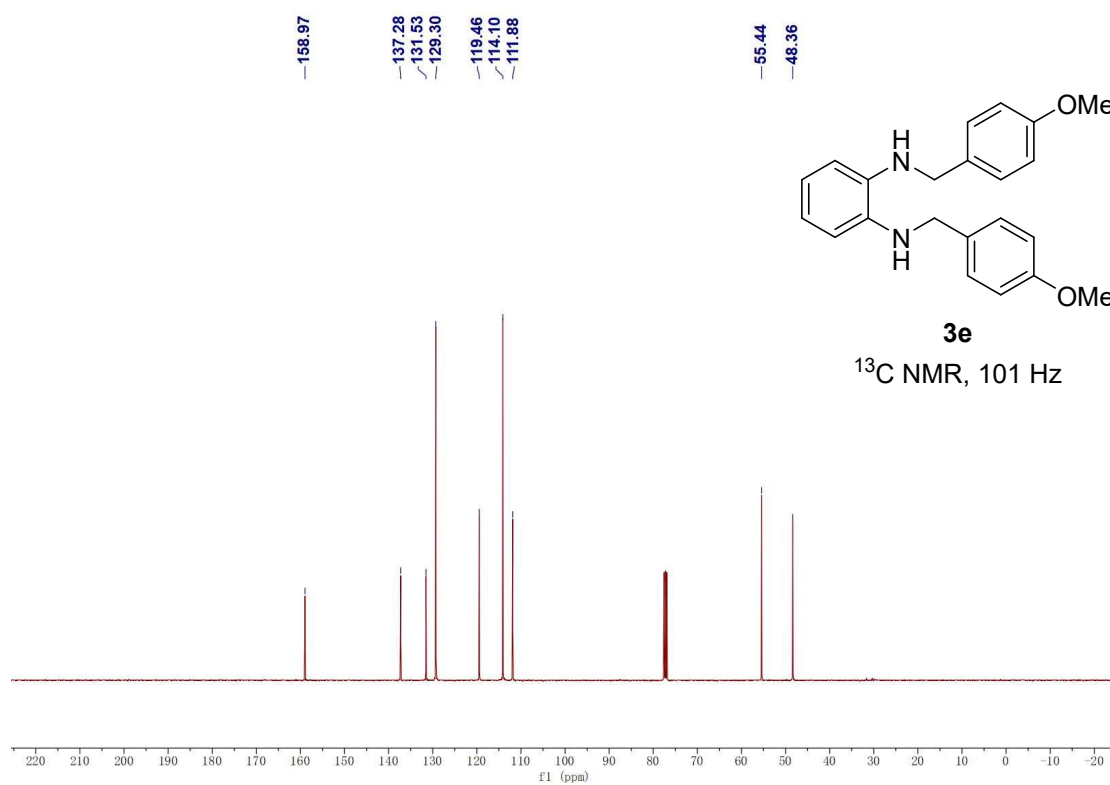

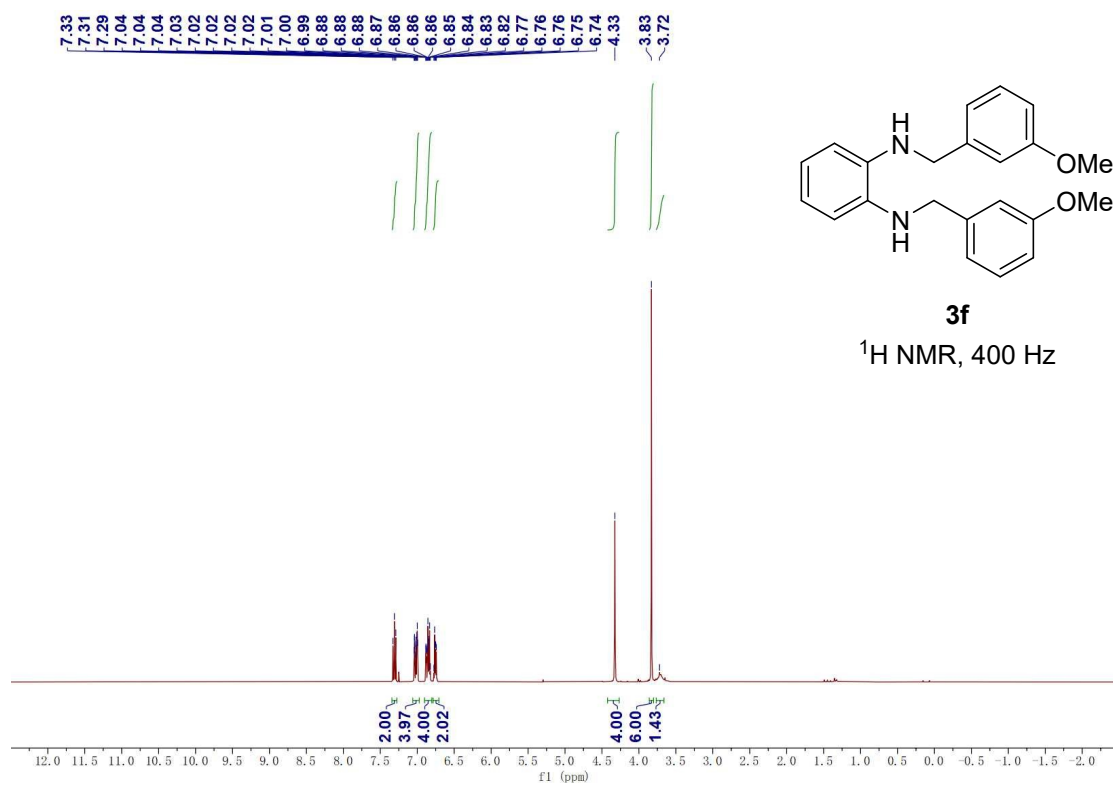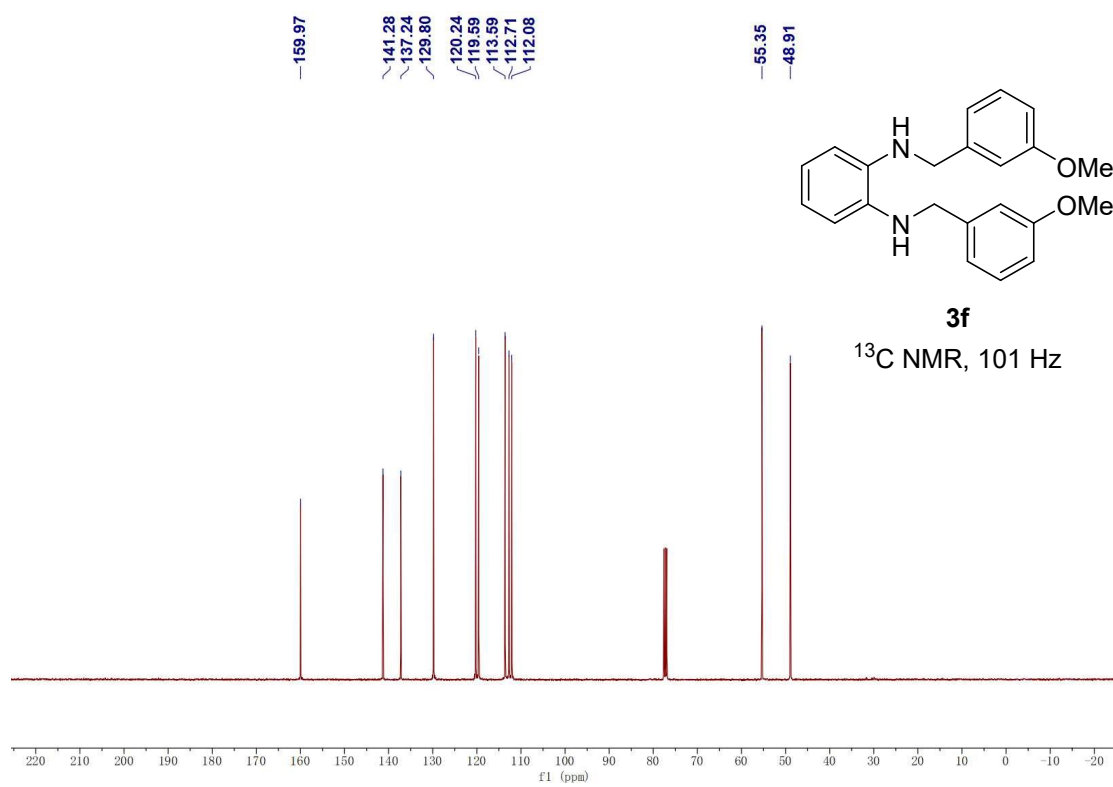

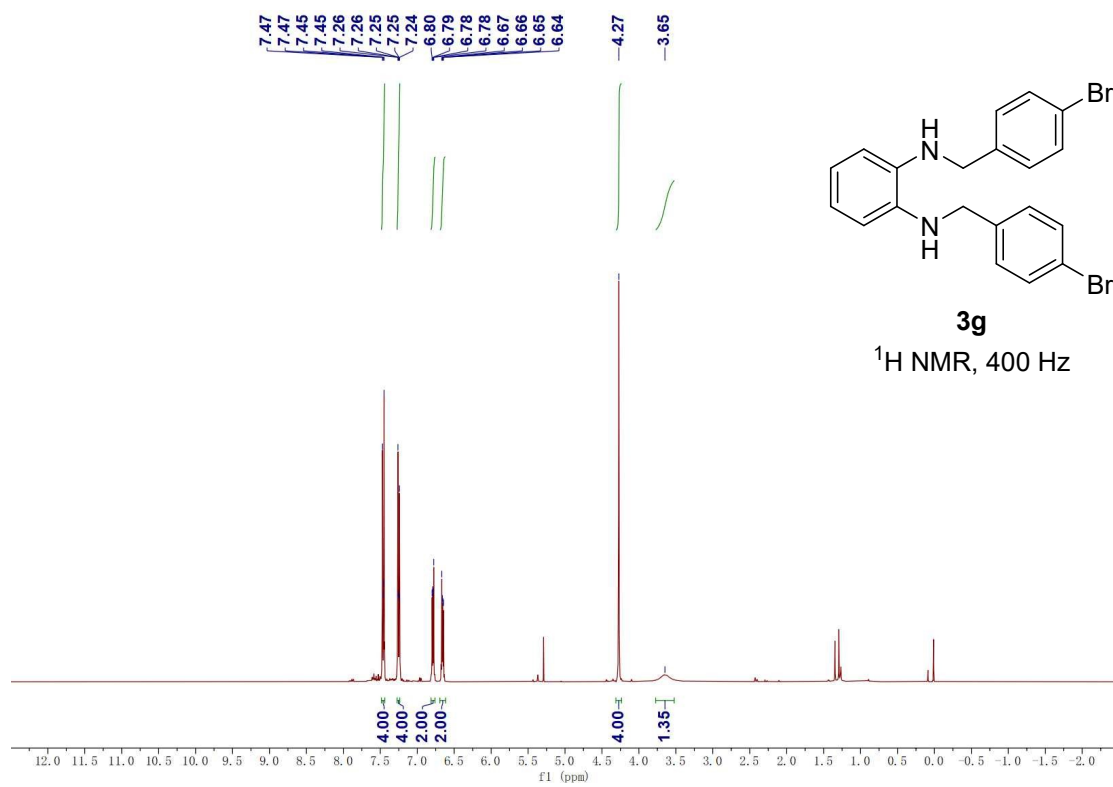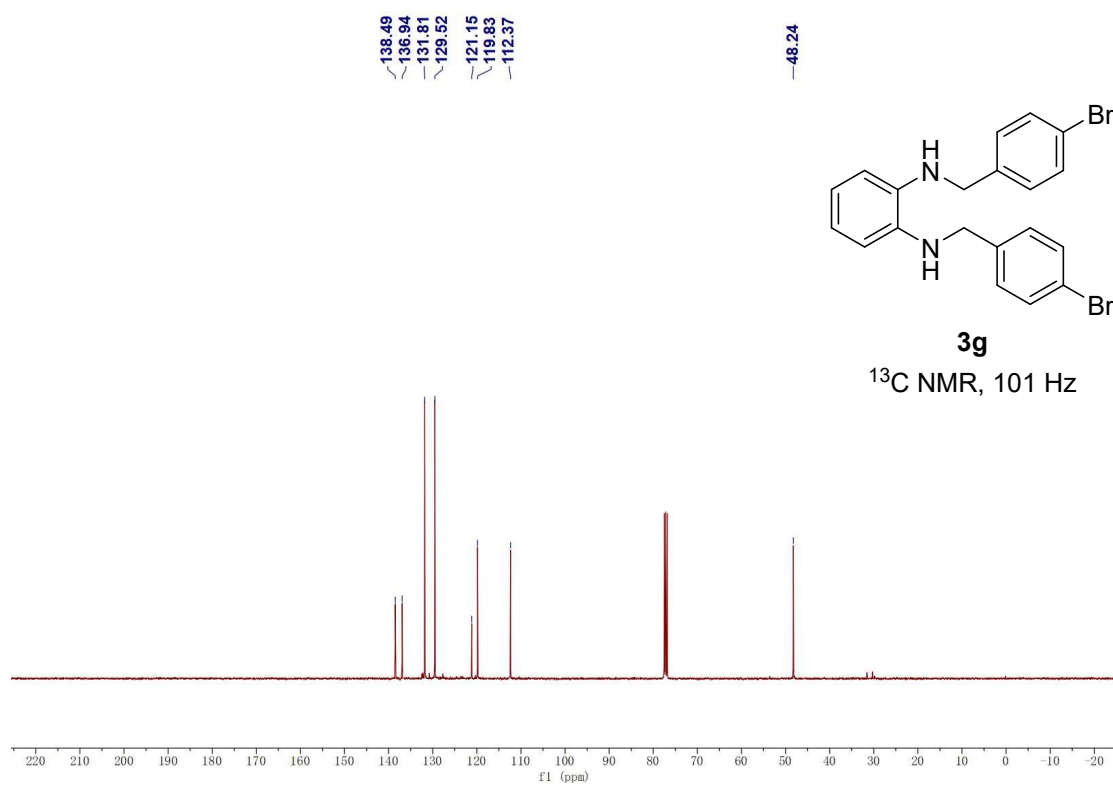

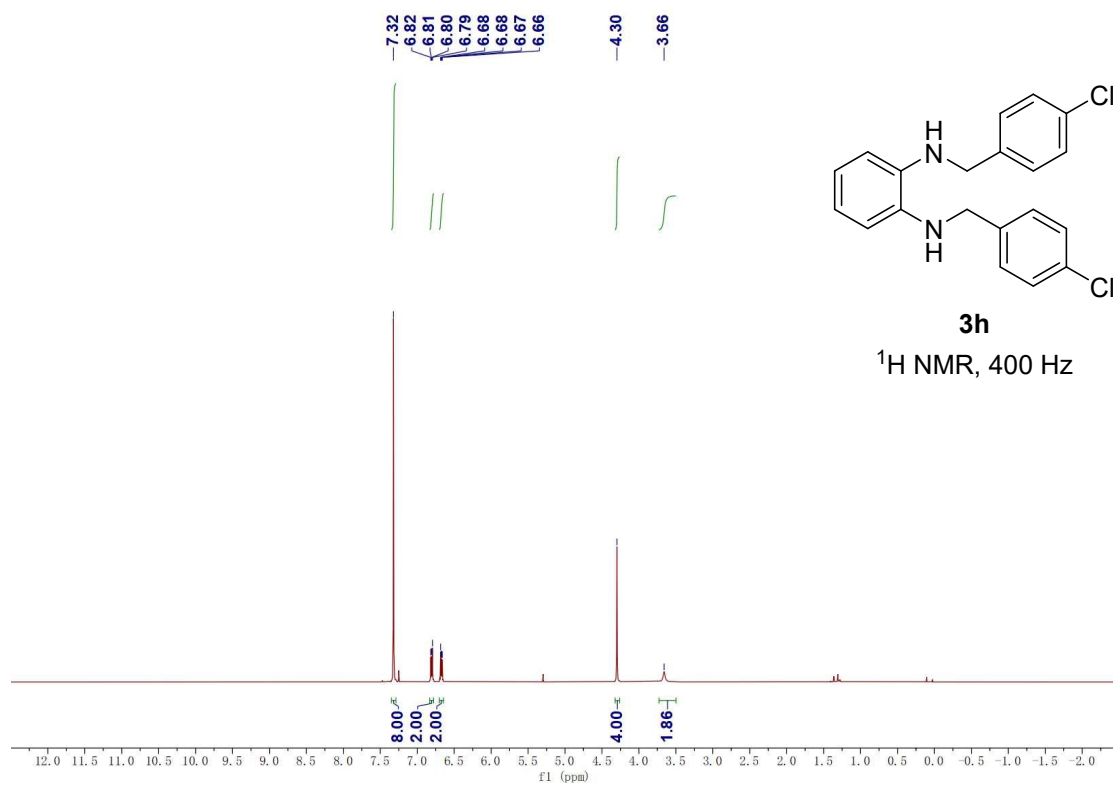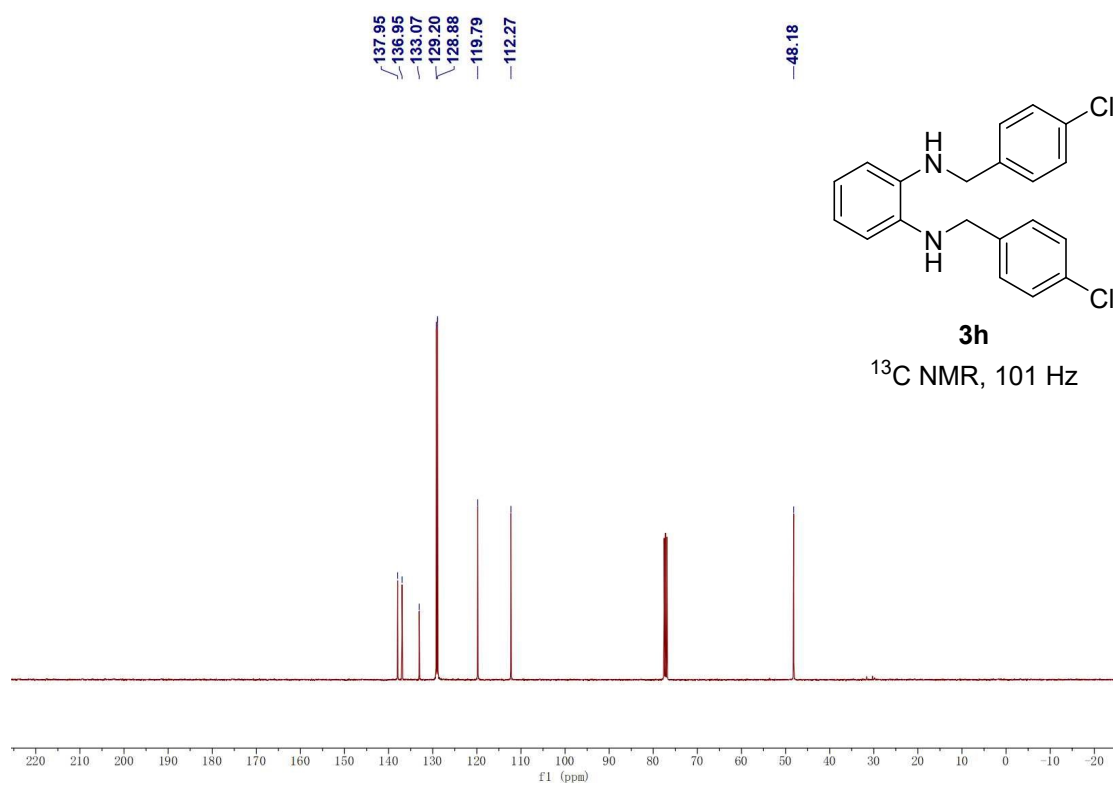

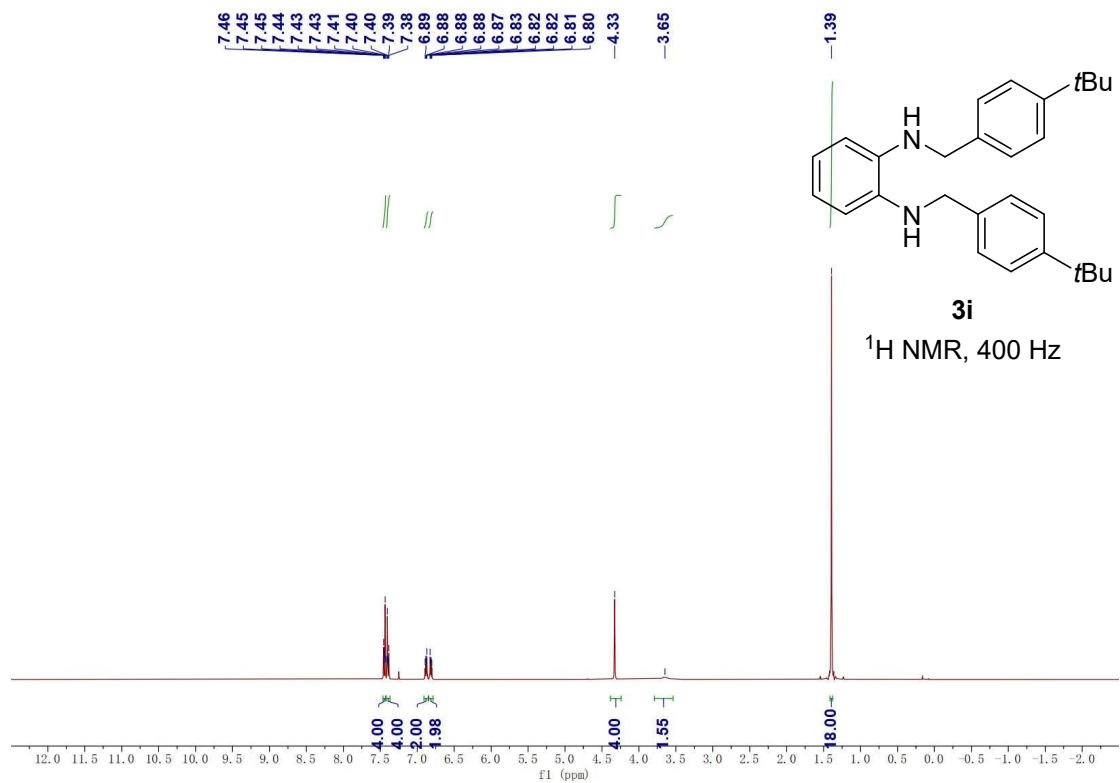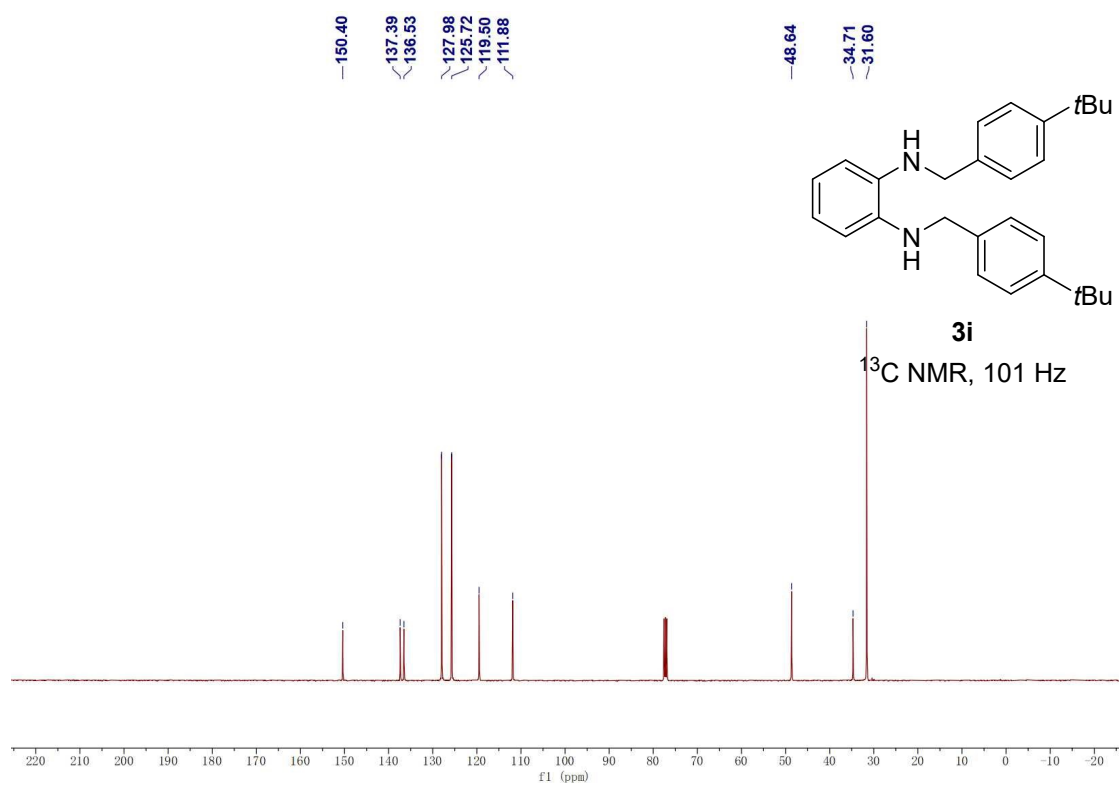

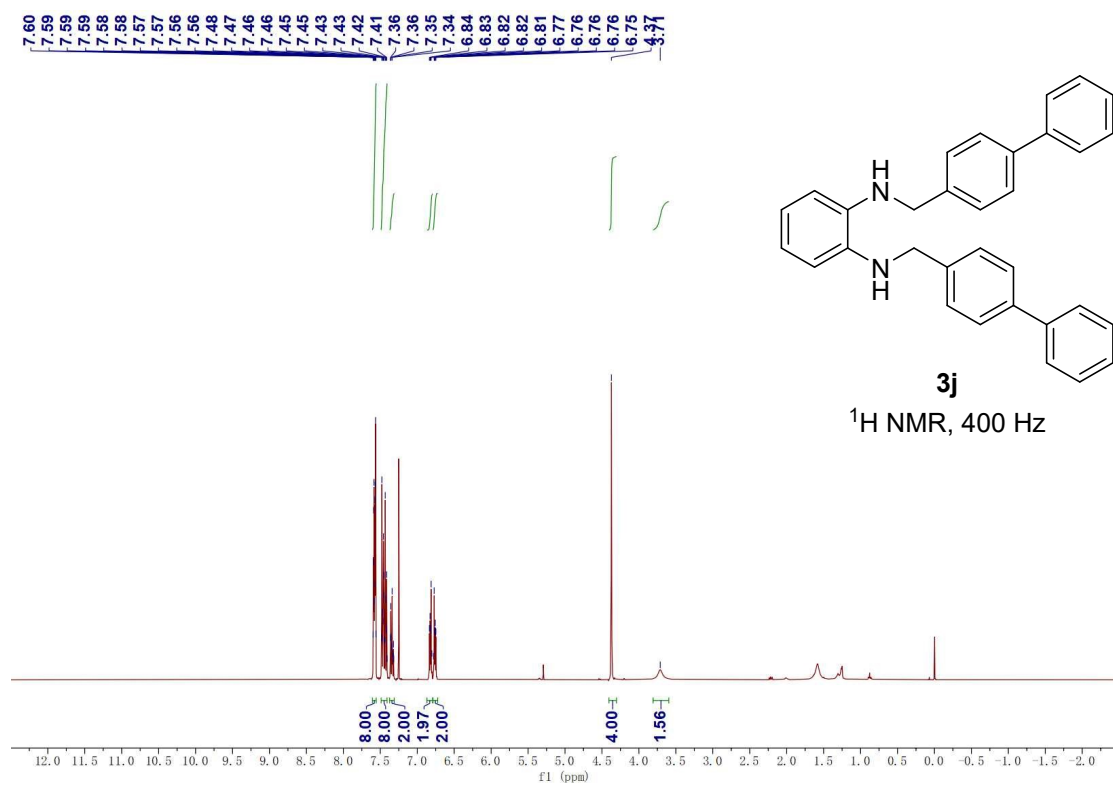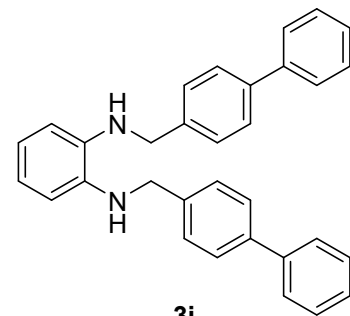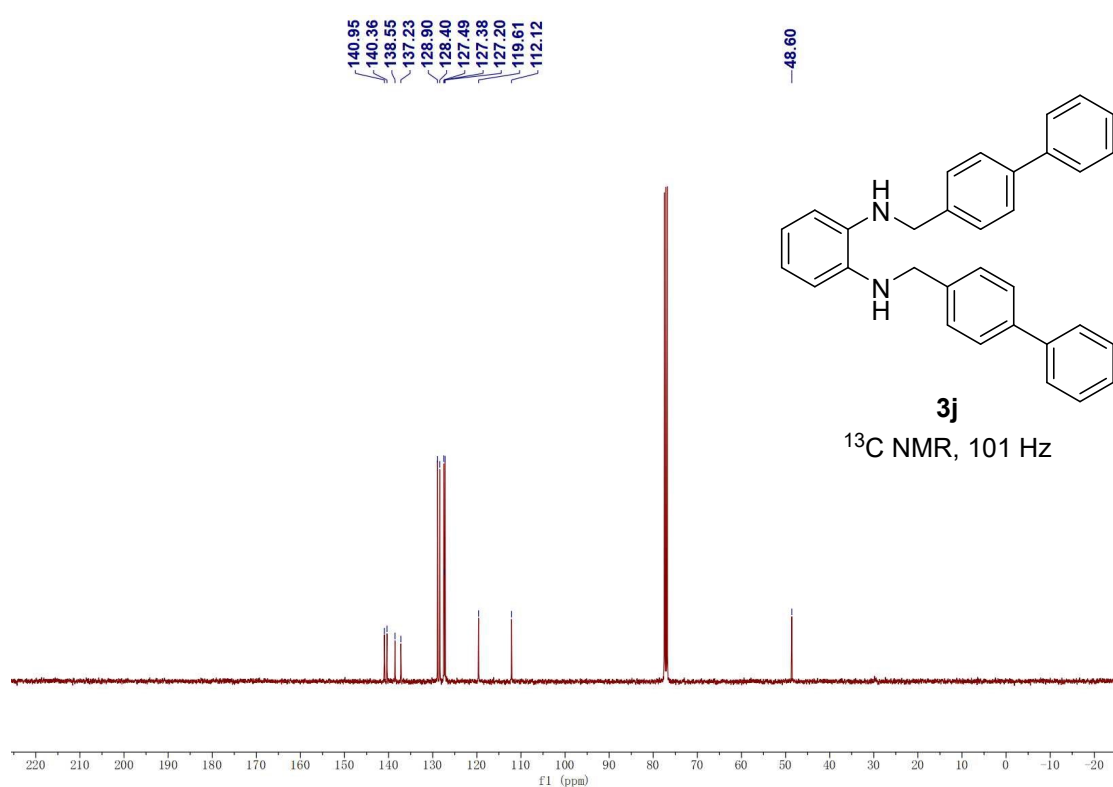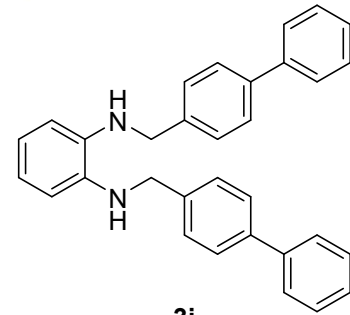

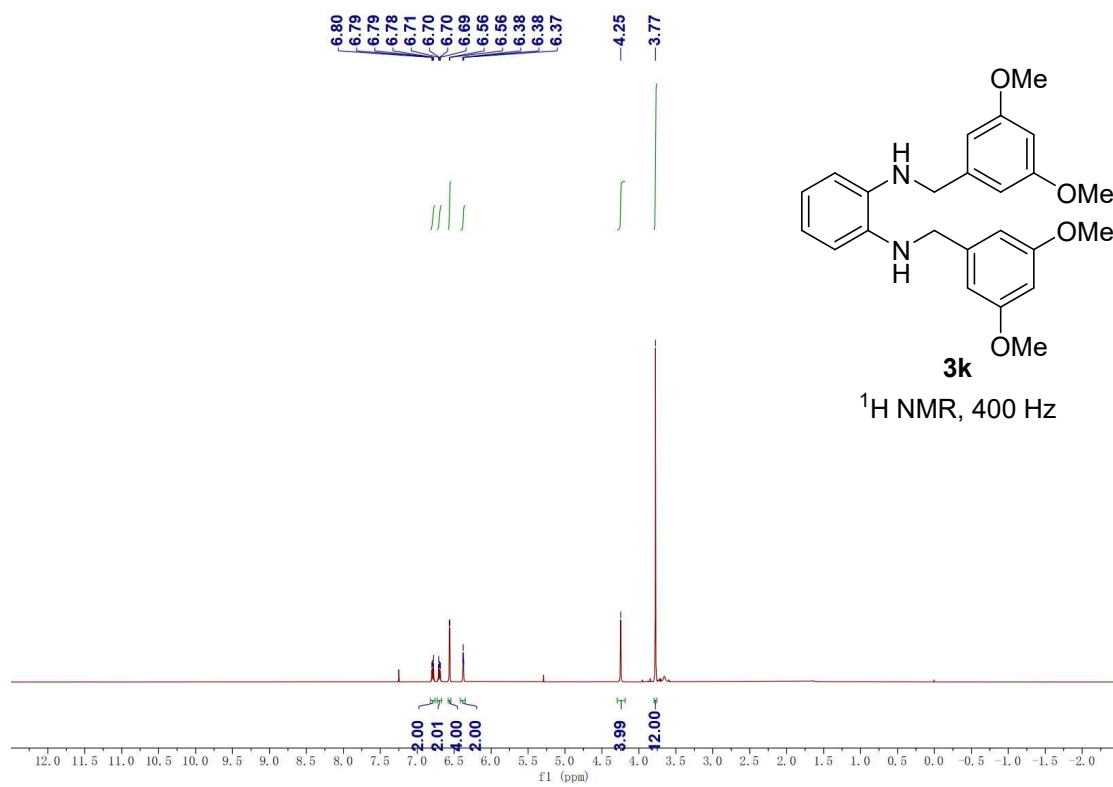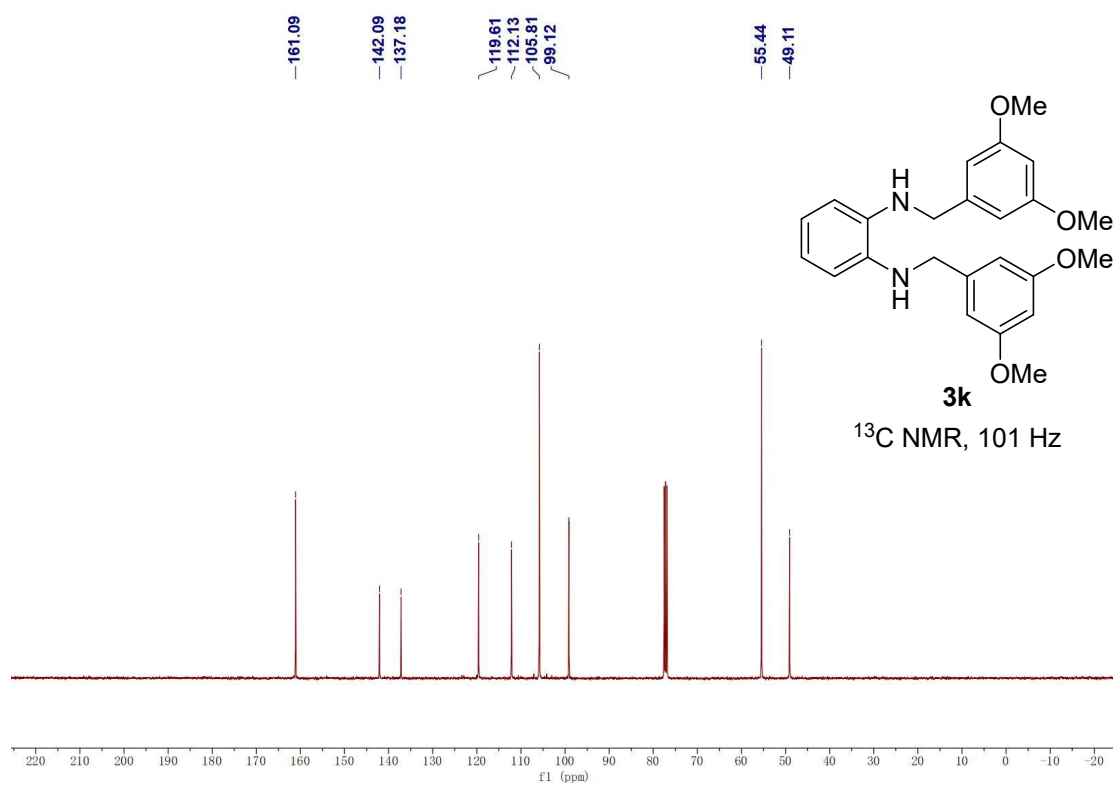



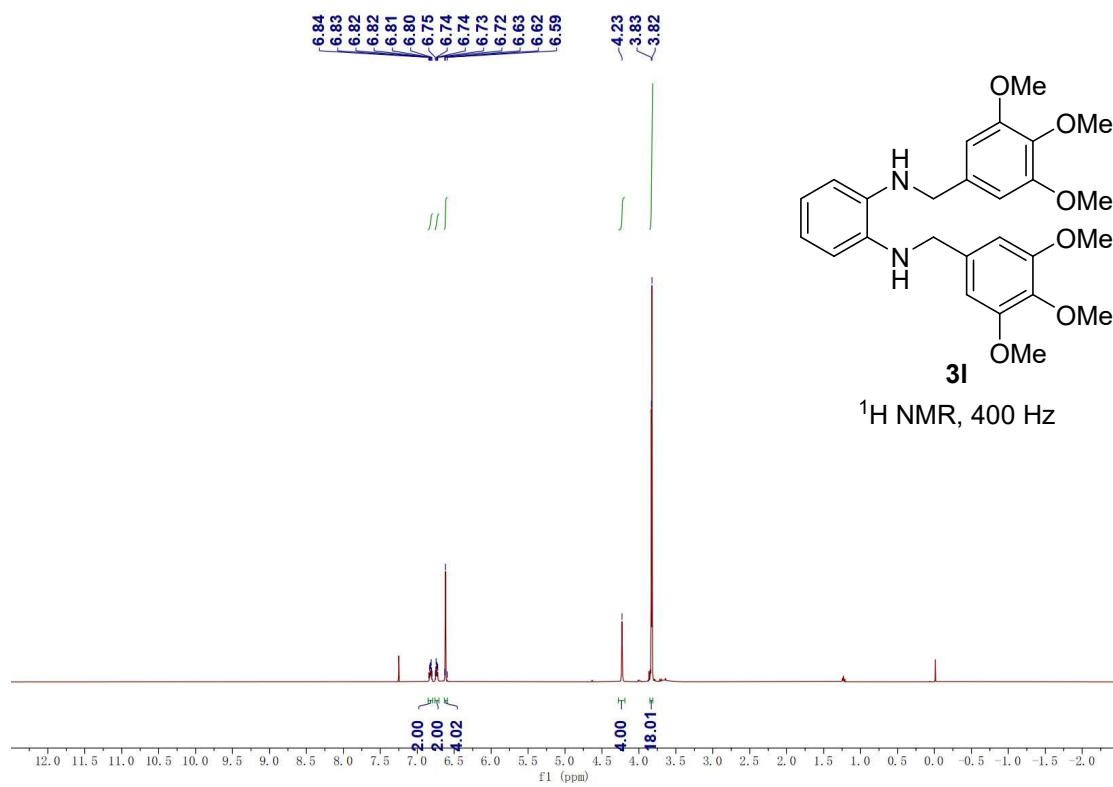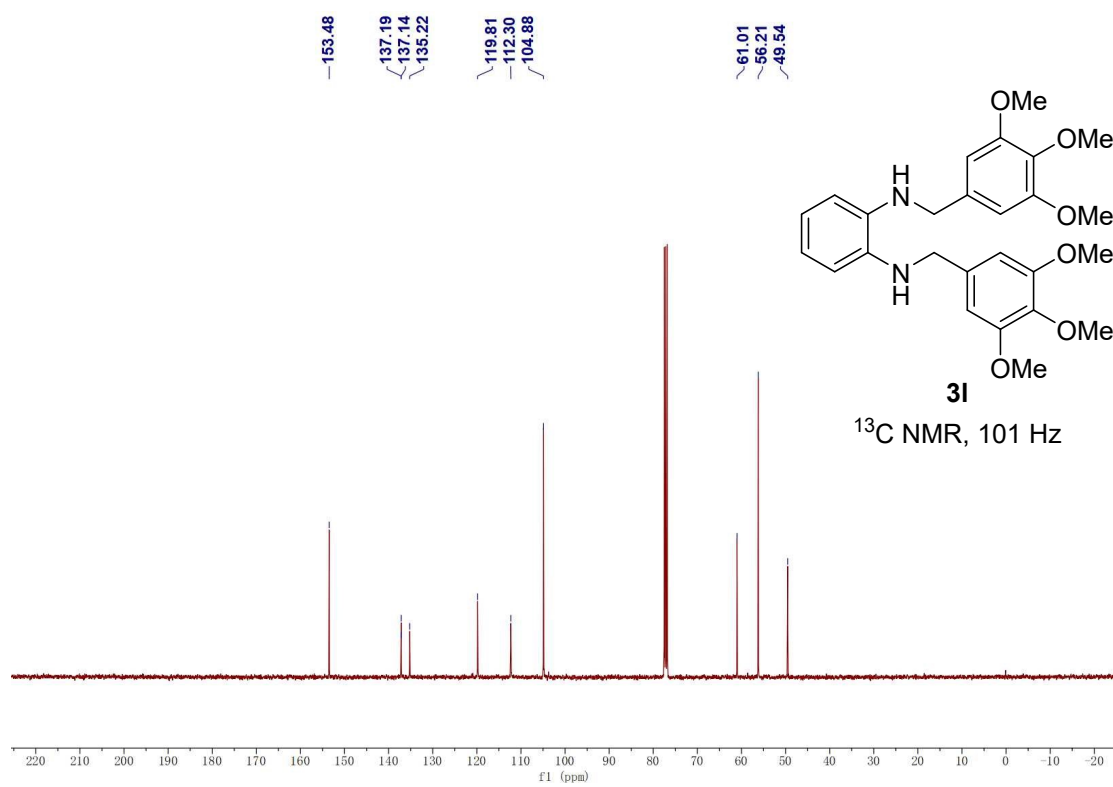

7.37  
7.37  
7.35  
7.34  
7.34  
7.33  
7.33  
7.29  
7.28  
7.27  
7.27  
7.25  
7.25  
6.83  
6.82  
6.81  
6.73  
6.72  
6.72  
6.71  
3.37  
3.35  
3.33  
2.97  
2.95

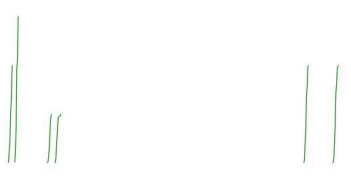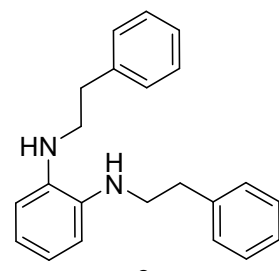

**3m**

<sup>1</sup>H NMR, 400 Hz

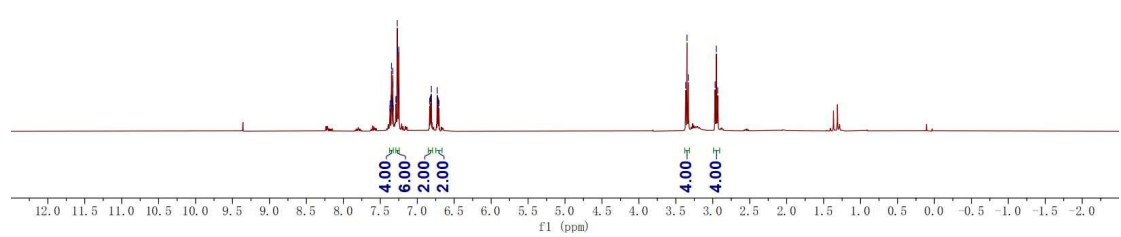

139.67  
137.34  
128.94  
128.74  
126.57  
119.42  
112.00

45.63  
35.99

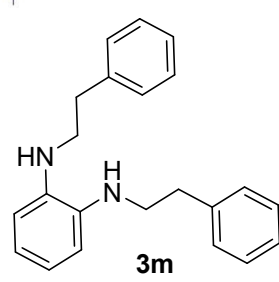

**3m**

<sup>13</sup>C NMR, 101 Hz

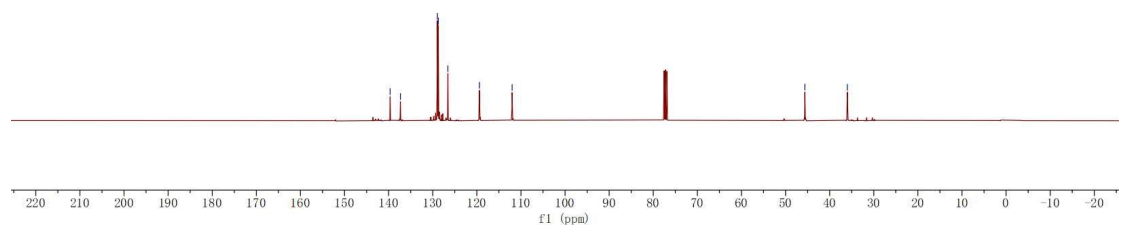

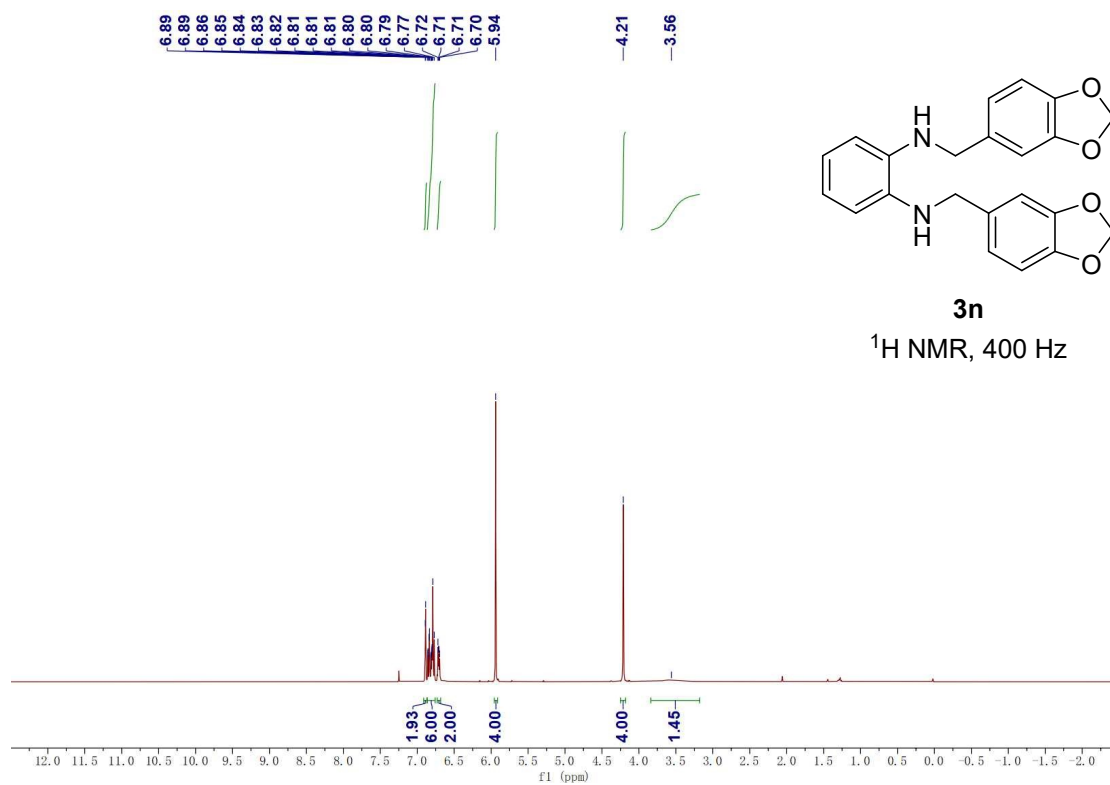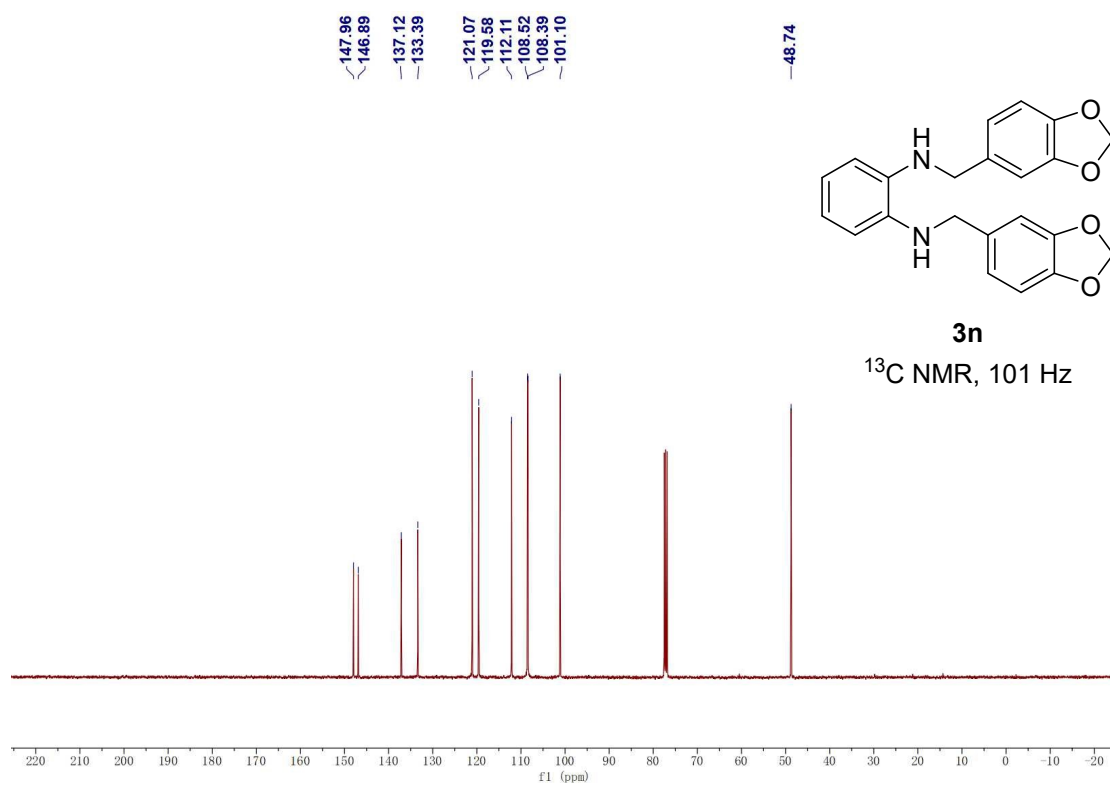

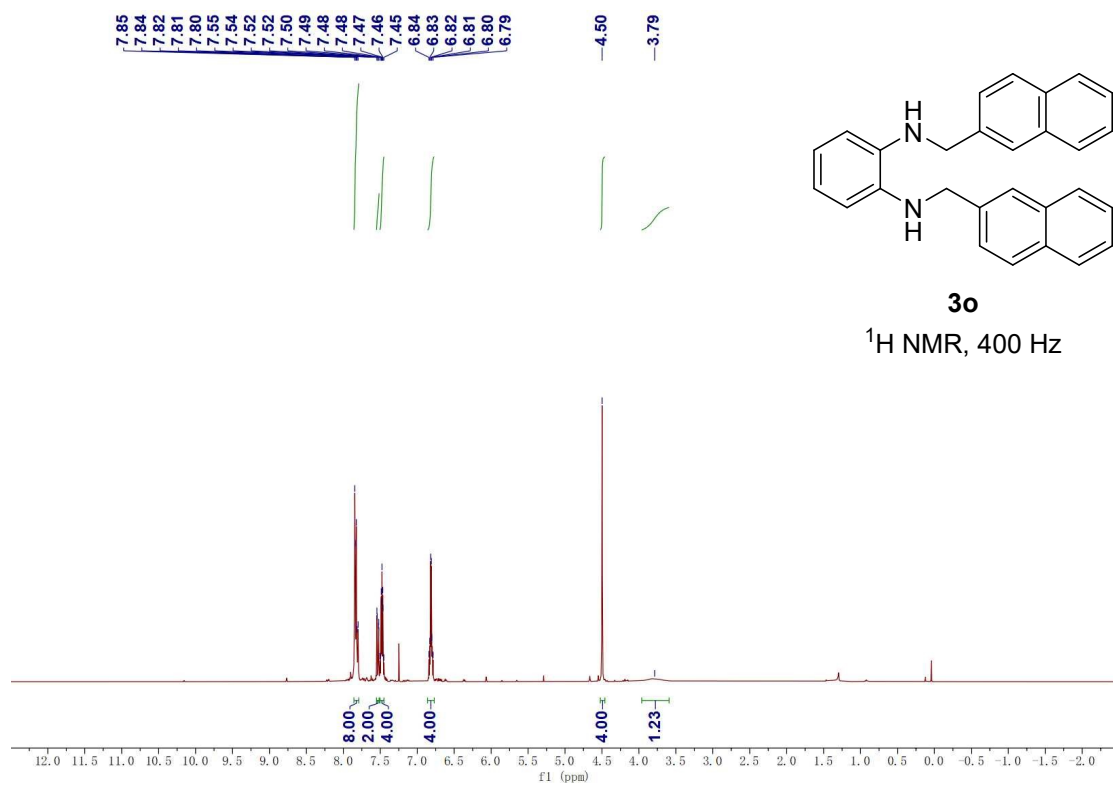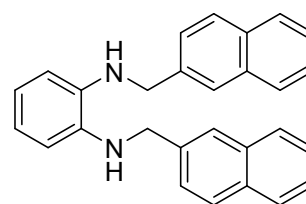

**3o**

<sup>1</sup>H NMR, 400 Hz

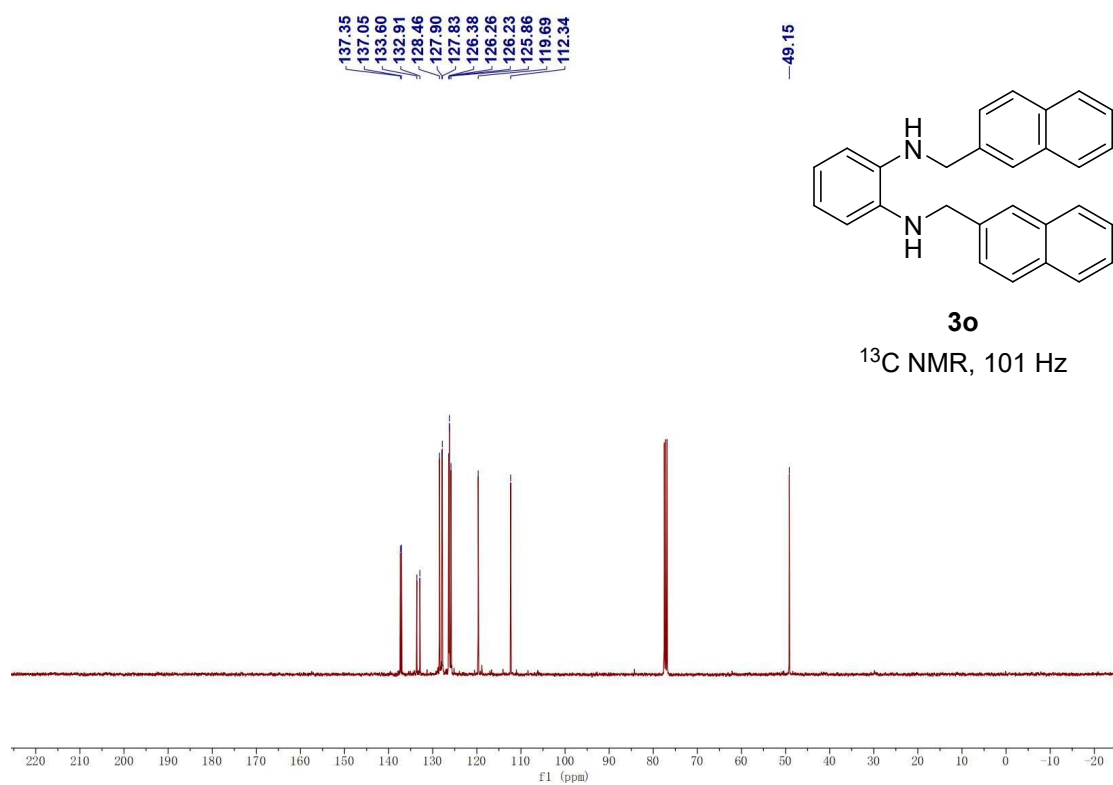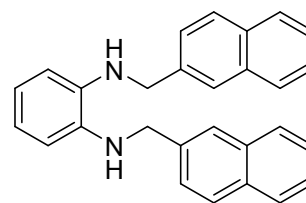

**3o**

<sup>13</sup>C NMR, 101 Hz

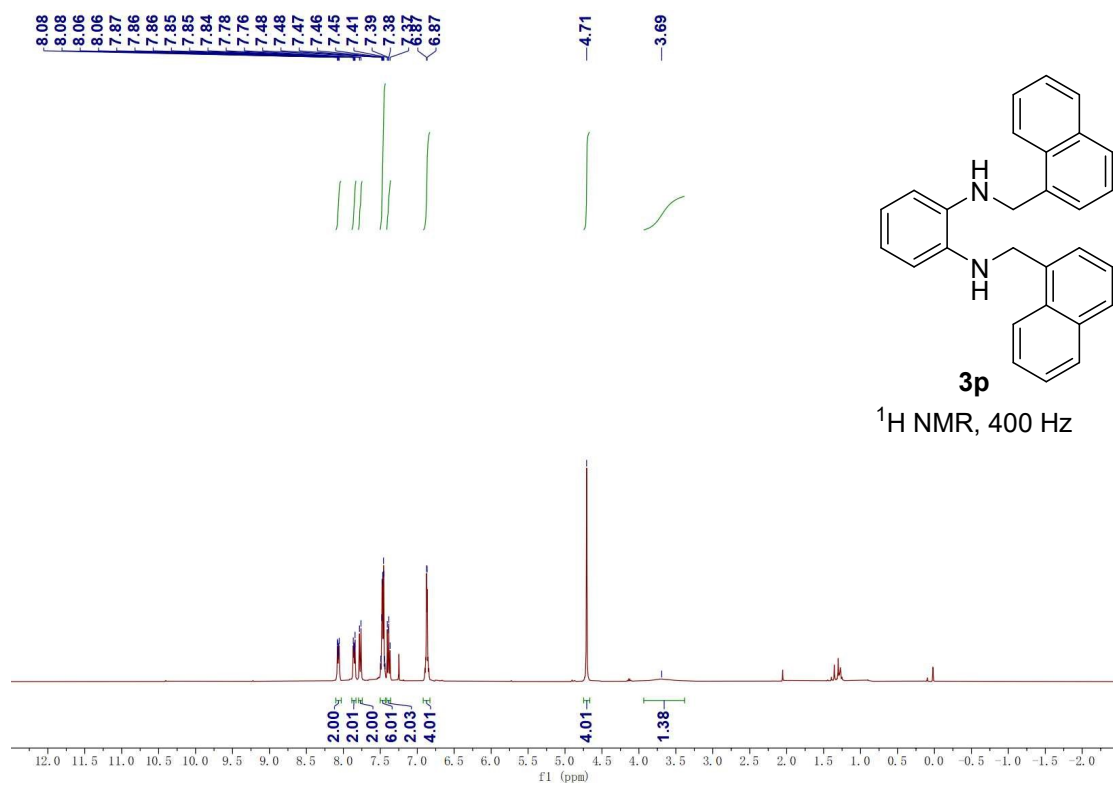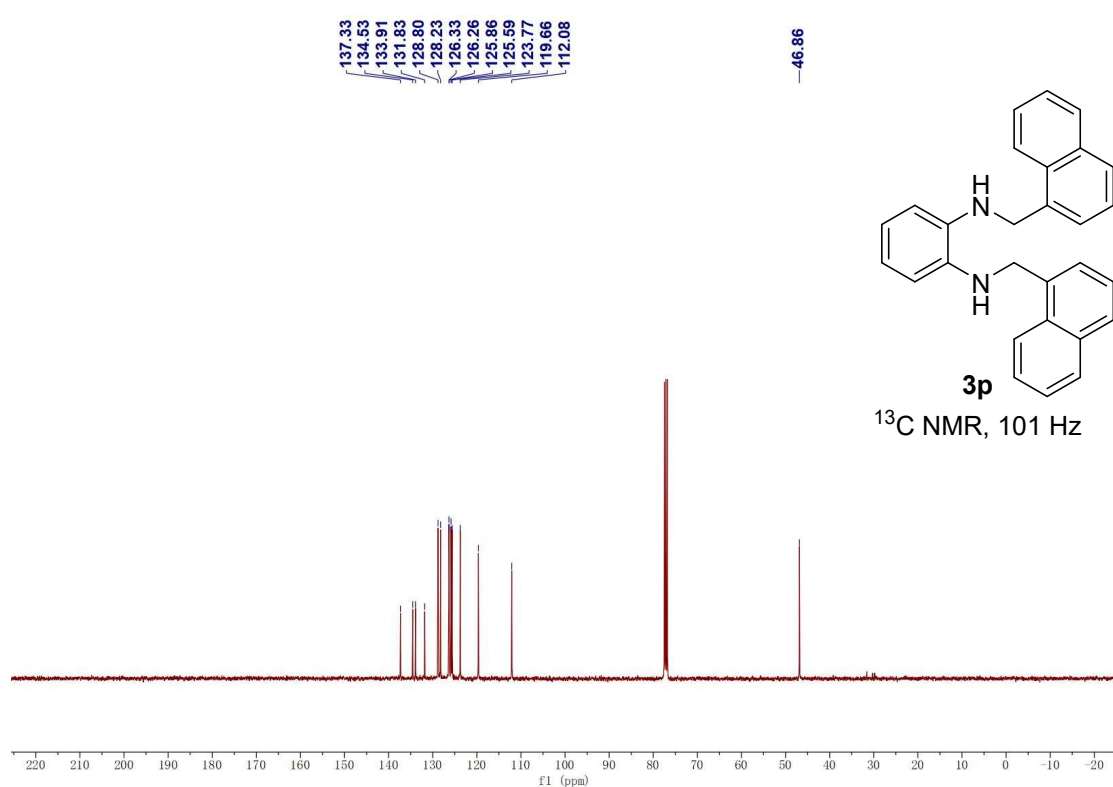

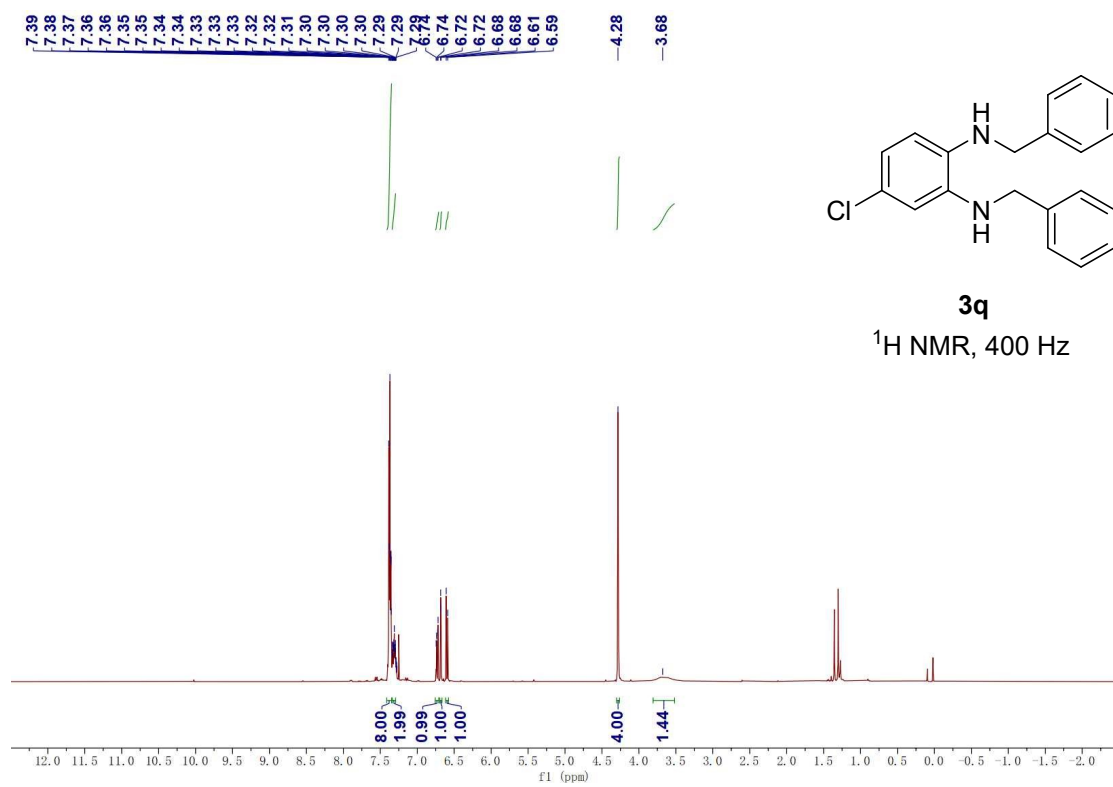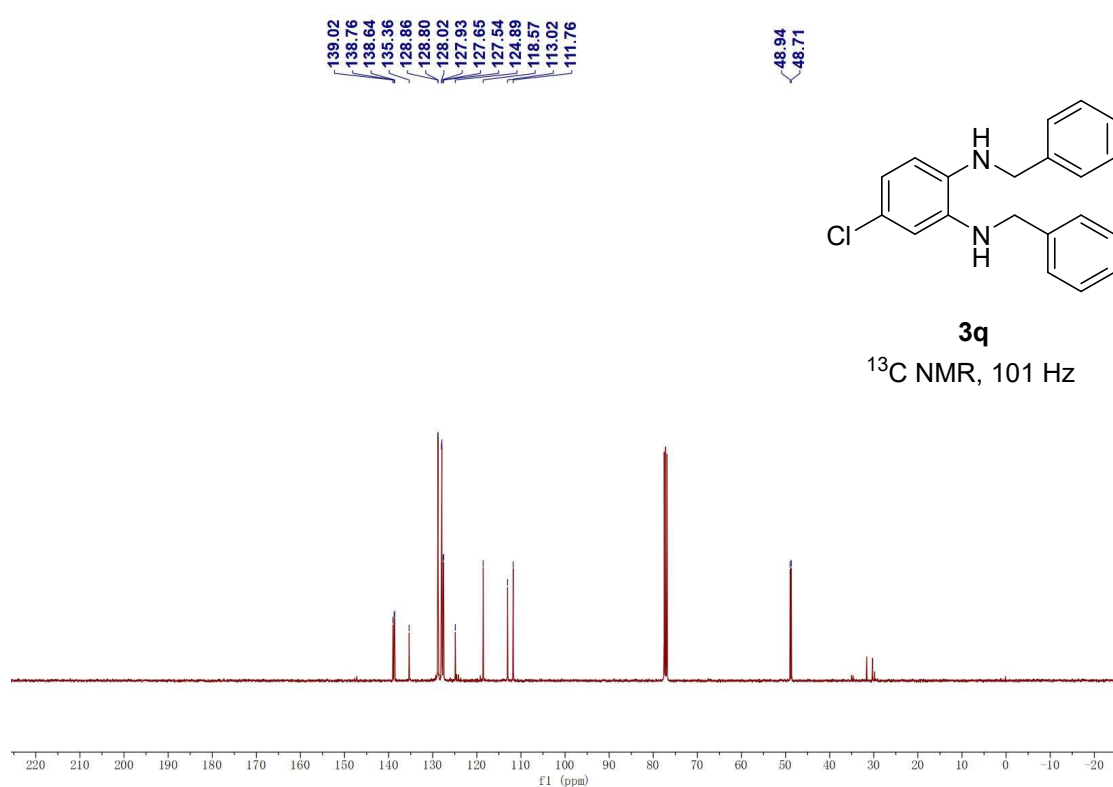

7.39  
7.39  
7.38  
7.37  
7.37  
7.36  
7.36  
7.35  
7.35  
7.34  
7.34  
7.33  
7.32  
7.31  
7.31  
7.30  
7.30  
7.30  
7.29  
7.29  
6.88  
6.88  
6.86  
6.86  
6.82  
6.81  
6.55  
6.53  
4.28  
4.27  
3.64

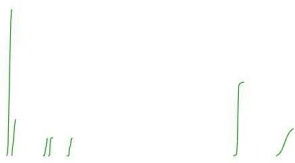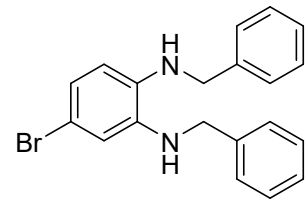

**3r**

<sup>1</sup>H NMR, 400 Hz

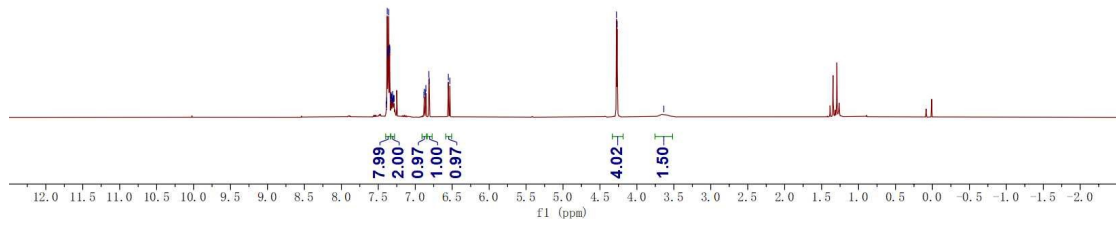

138.97  
138.76  
138.73  
135.96  
128.86  
128.80  
128.07  
127.88  
127.66  
127.53  
121.69  
114.51  
113.35  
112.13

48.81  
48.76

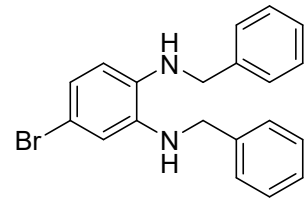

**3r**

<sup>13</sup>C NMR, 101 Hz

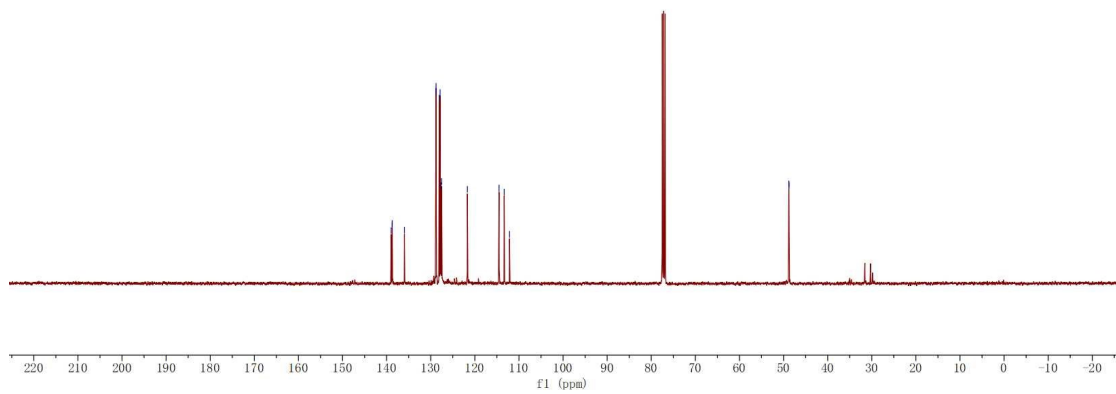

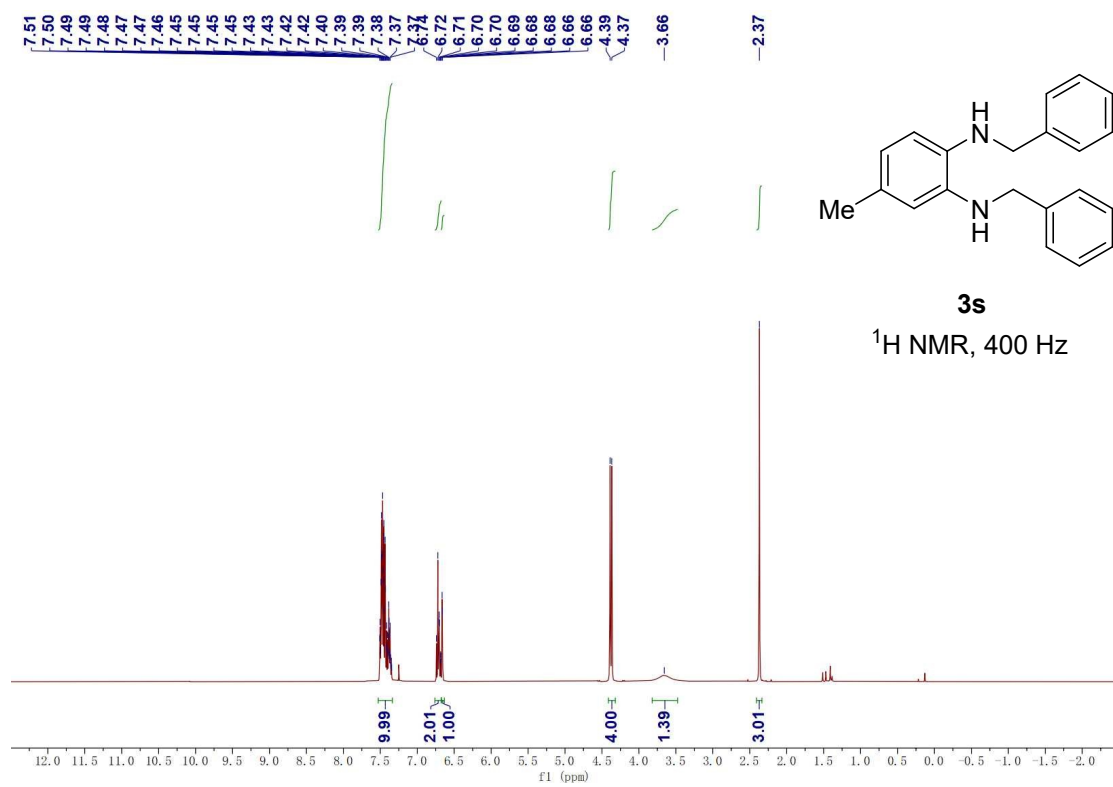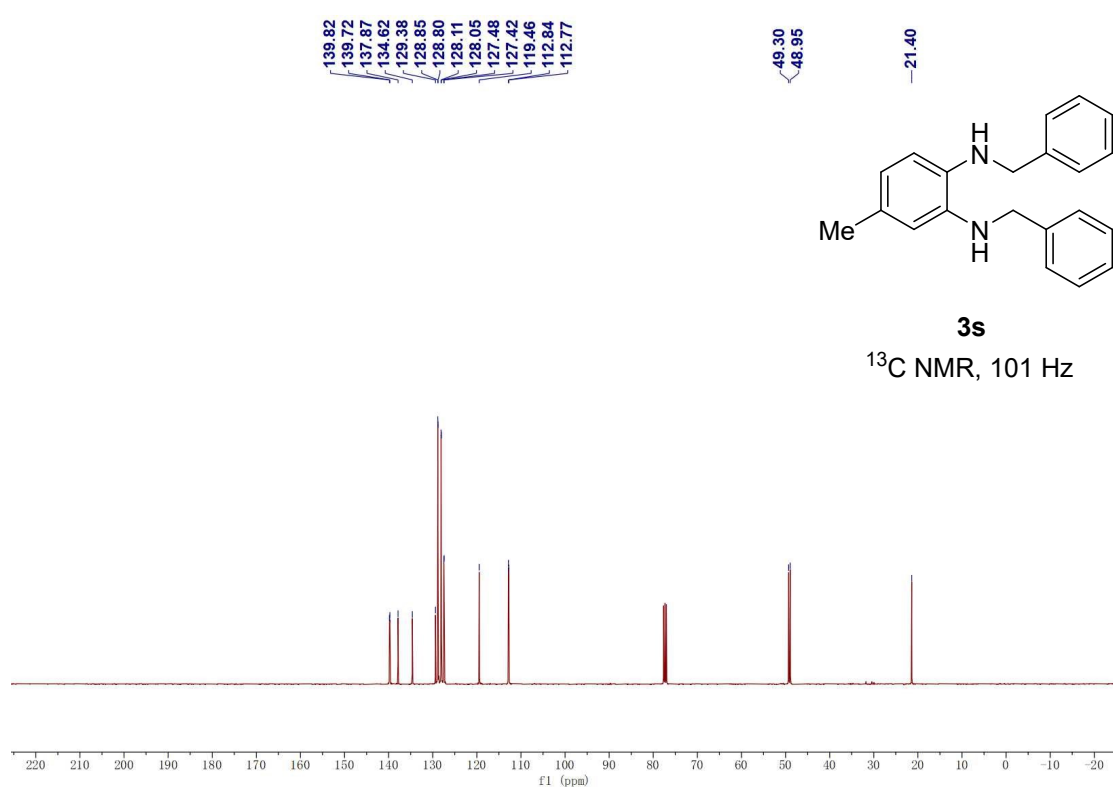



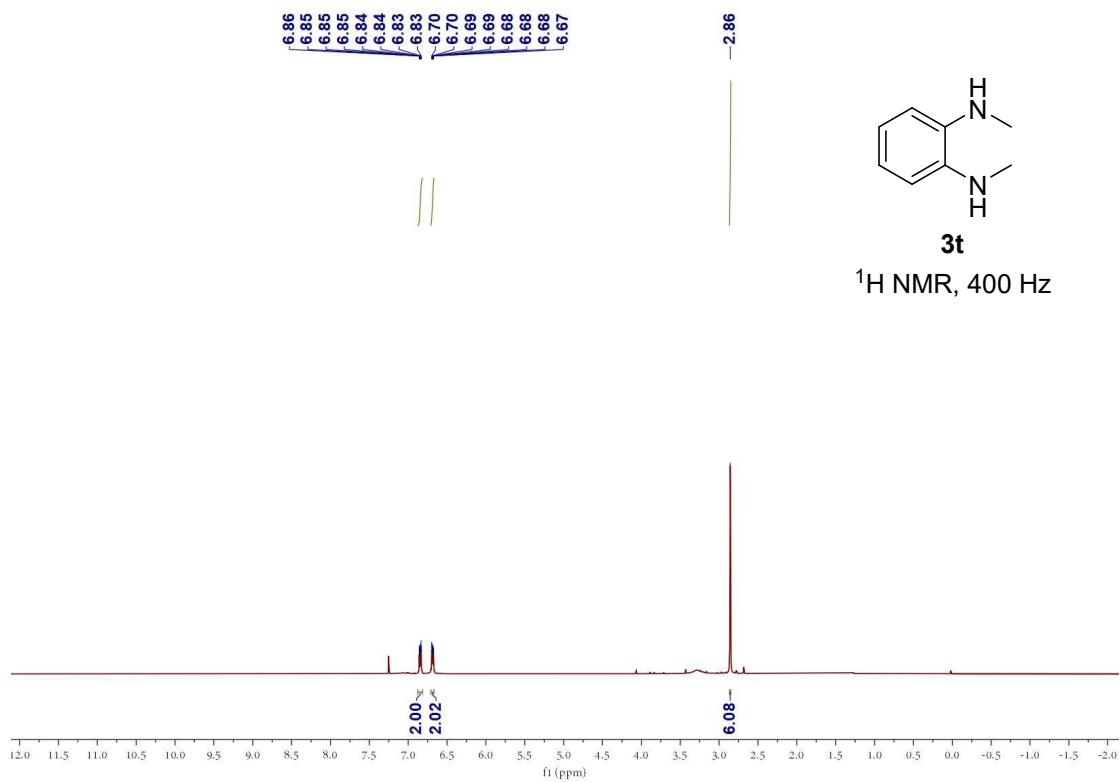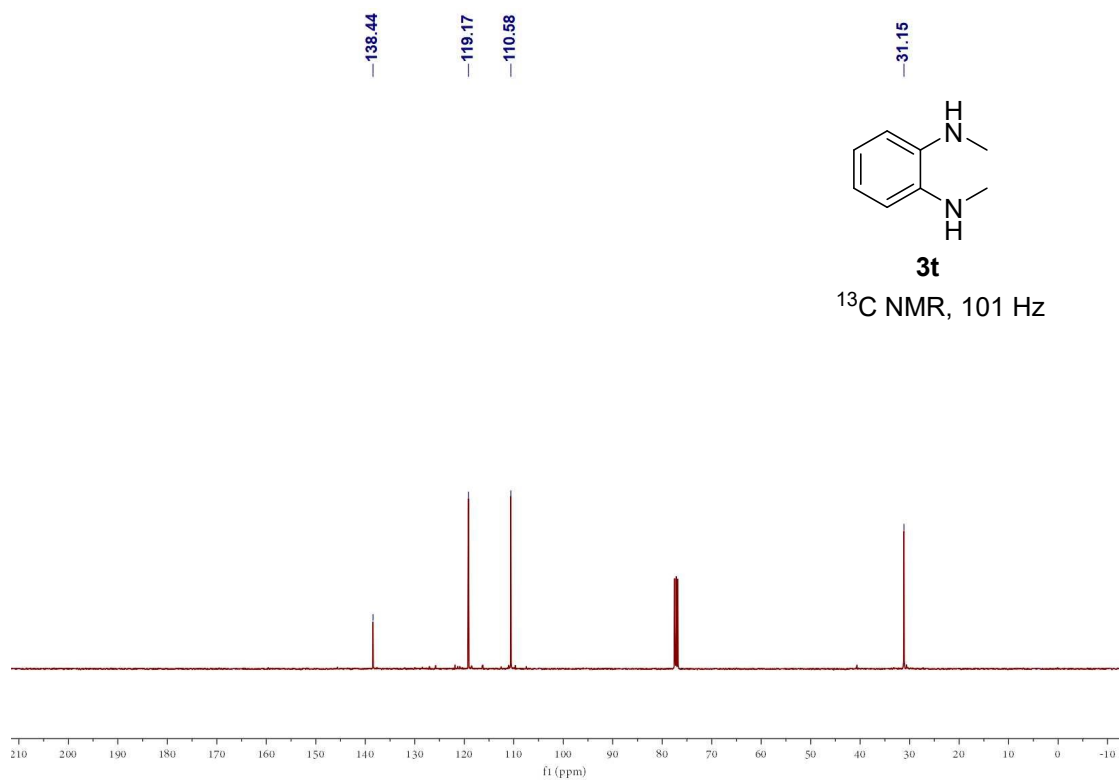

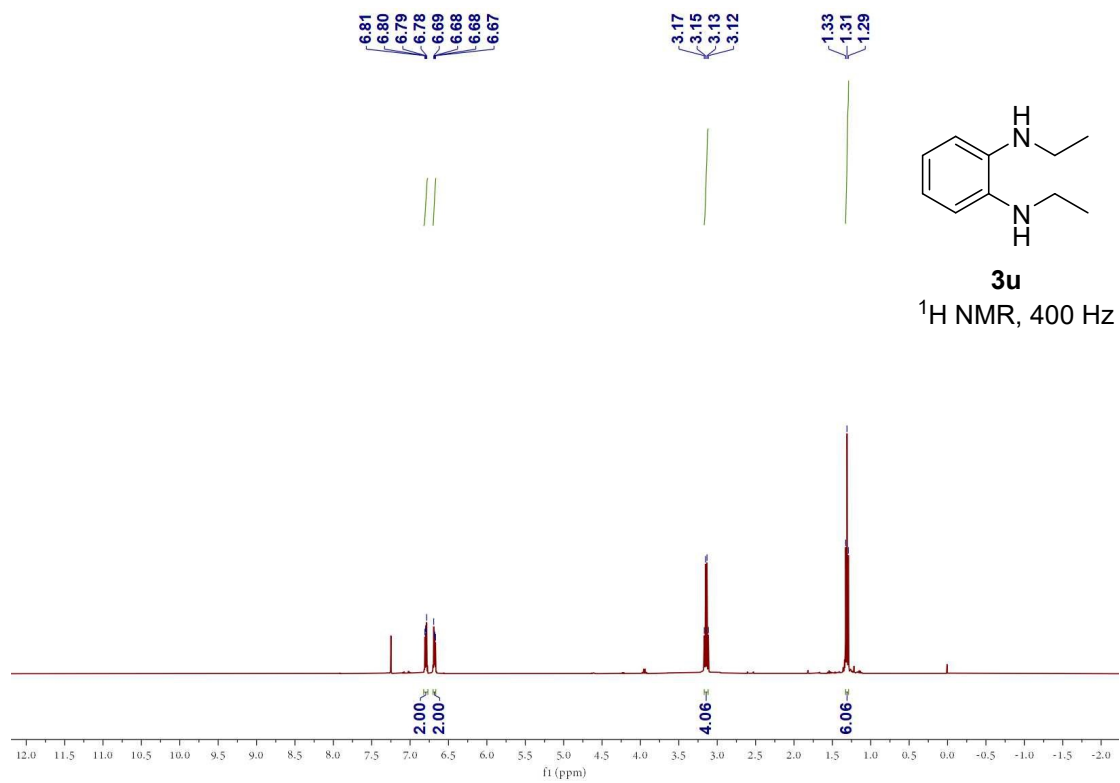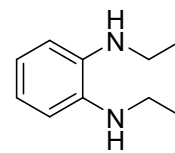

3u  
<sup>1</sup>H NMR, 400 Hz

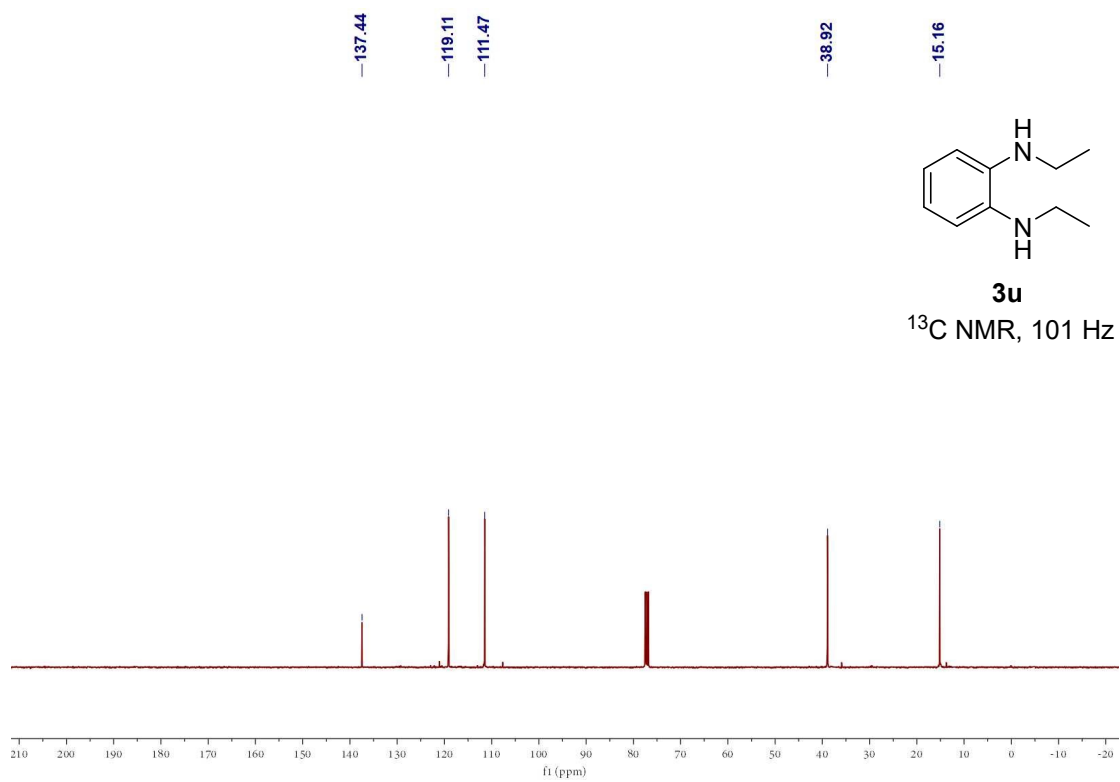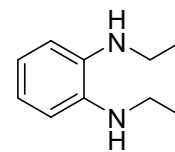

3u  
<sup>13</sup>C NMR, 101 Hz

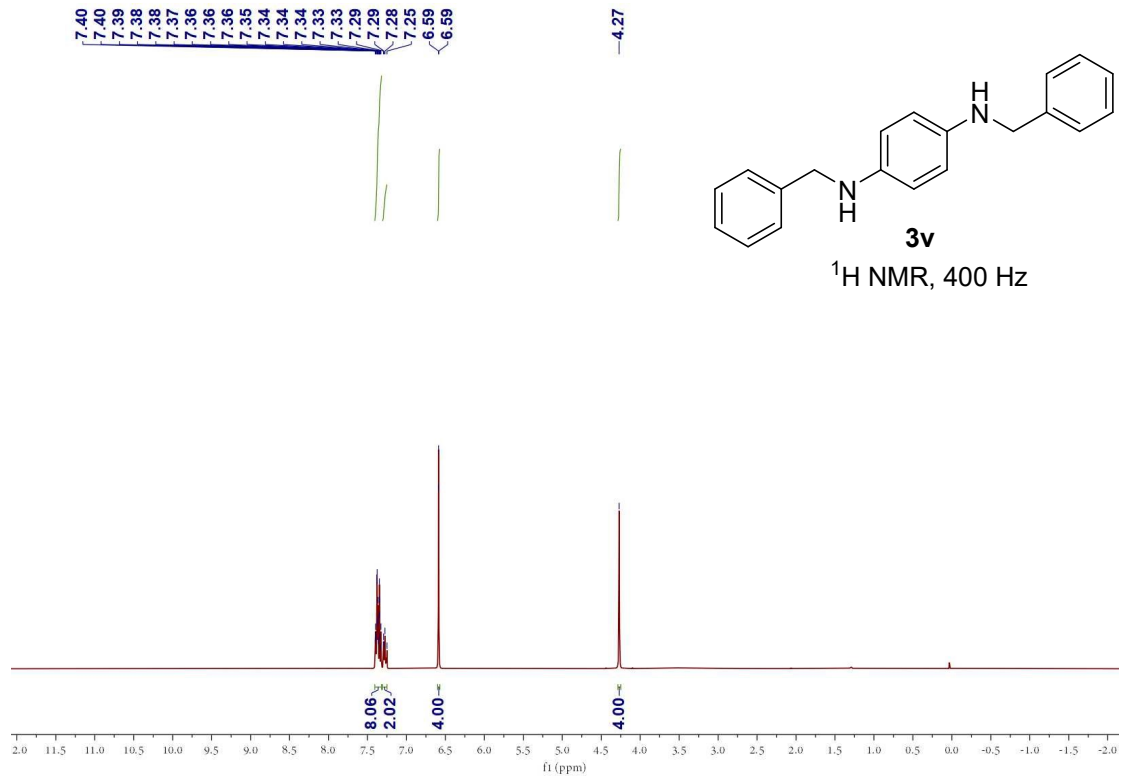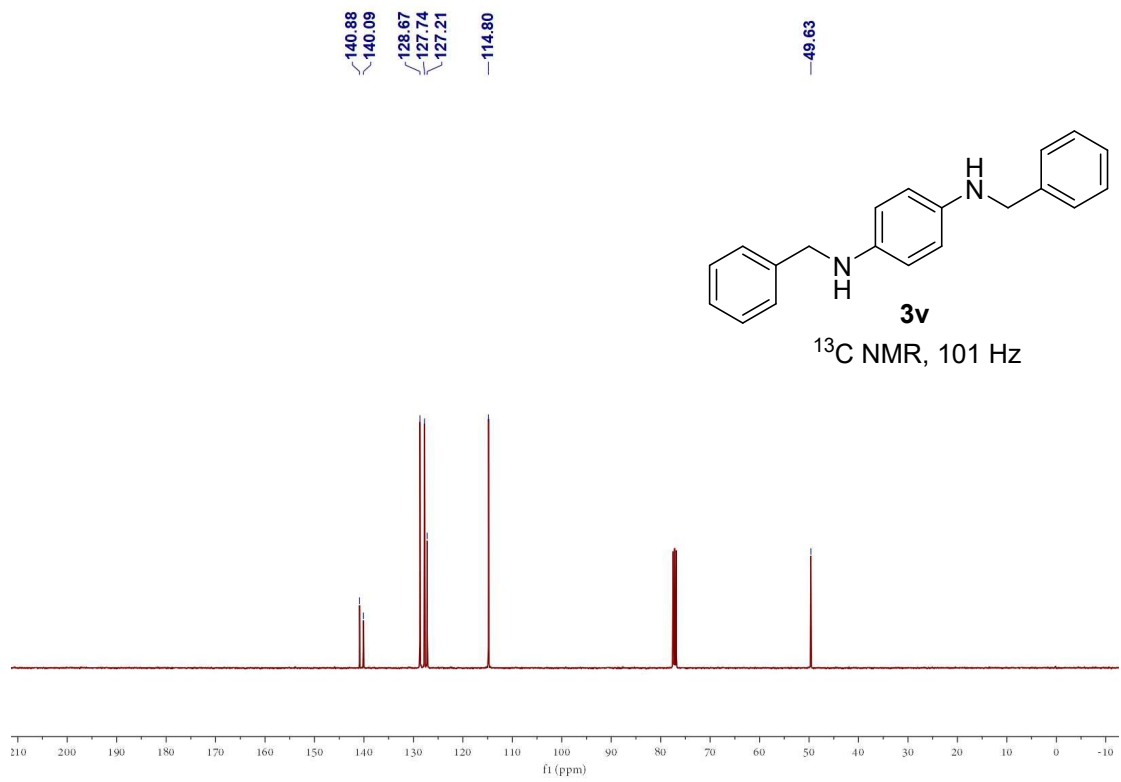

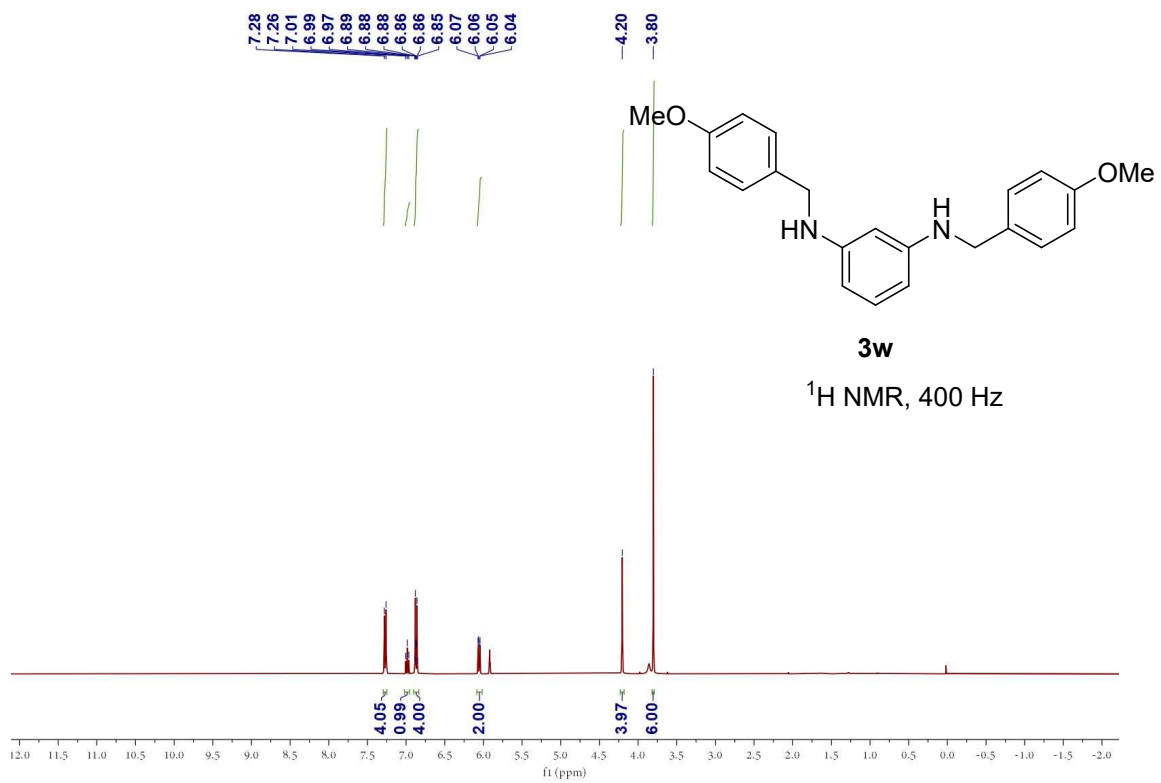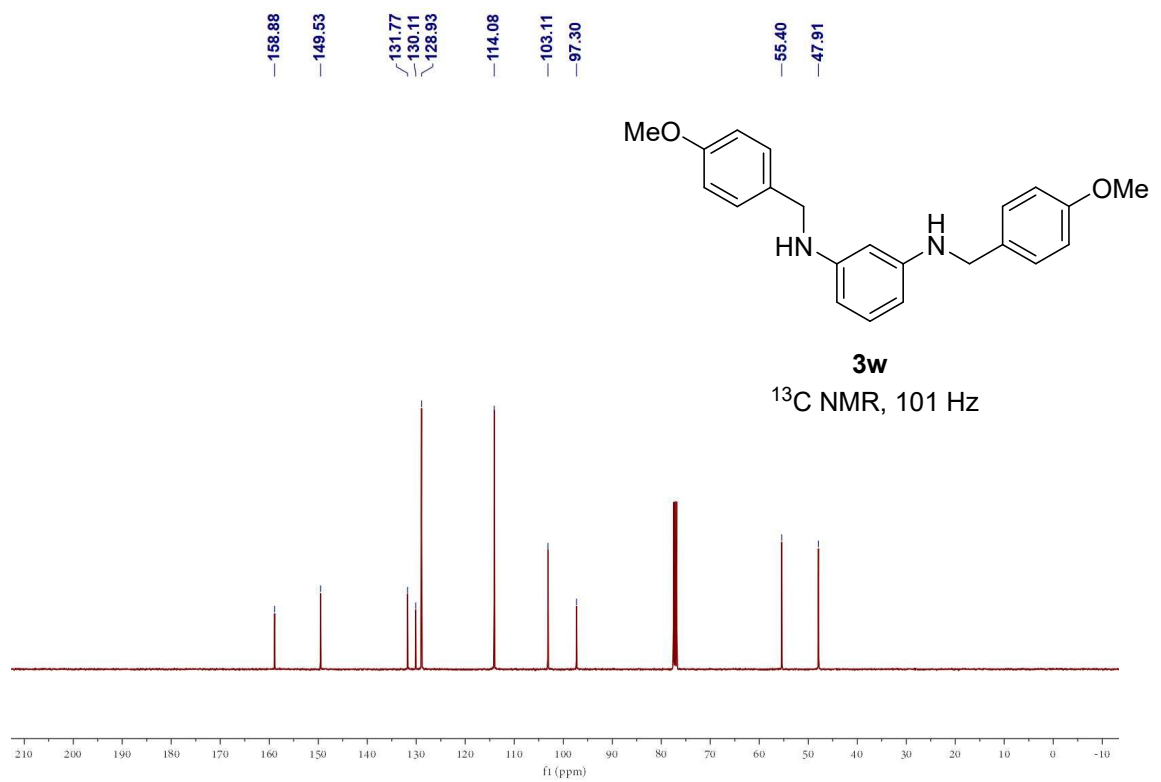

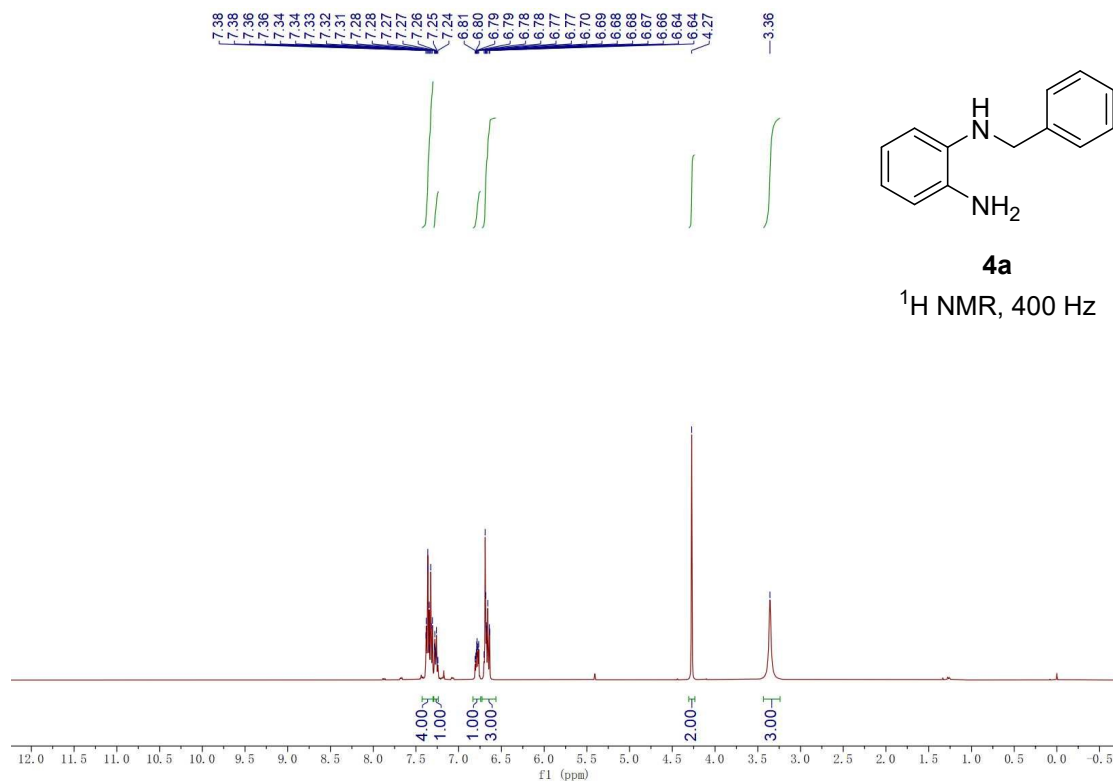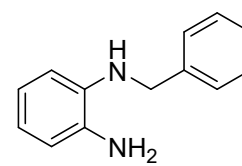

**4a**

<sup>1</sup>H NMR, 400 Hz

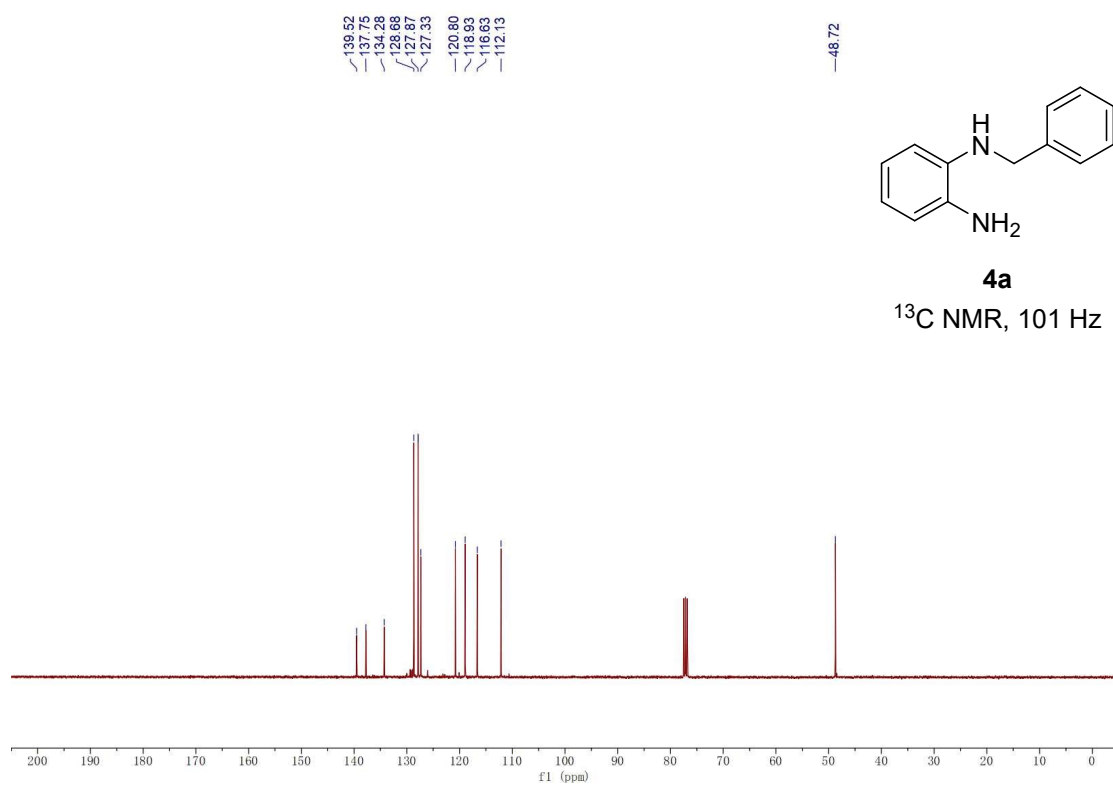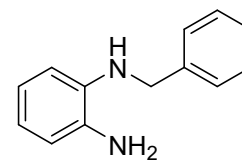

**4a**

<sup>13</sup>C NMR, 101 Hz

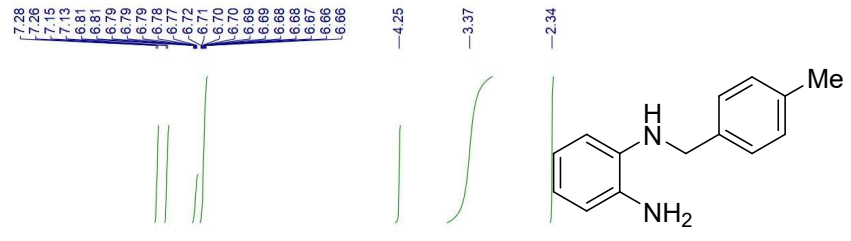

**4b**

<sup>1</sup>H NMR, 400 Hz

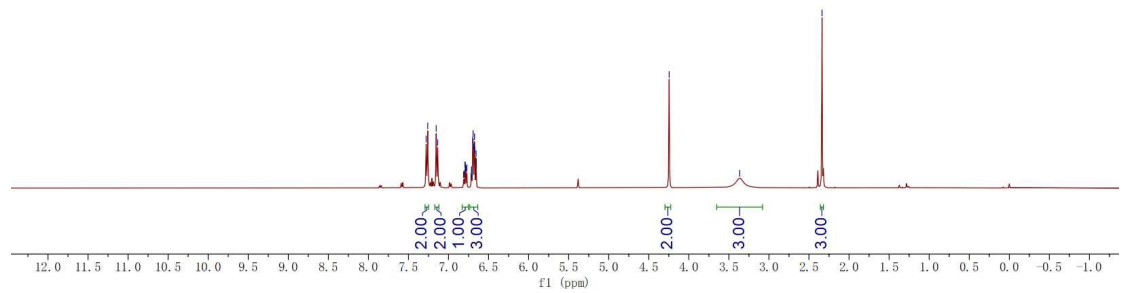

**4b**

<sup>13</sup>C NMR, 101 Hz

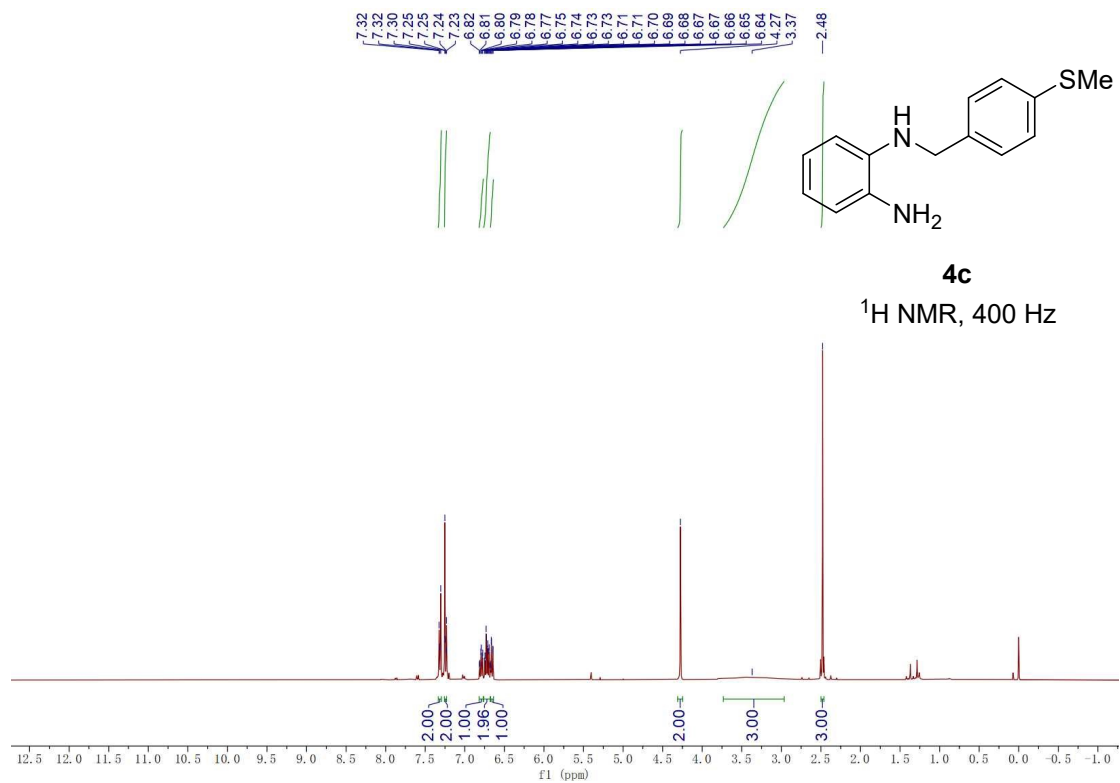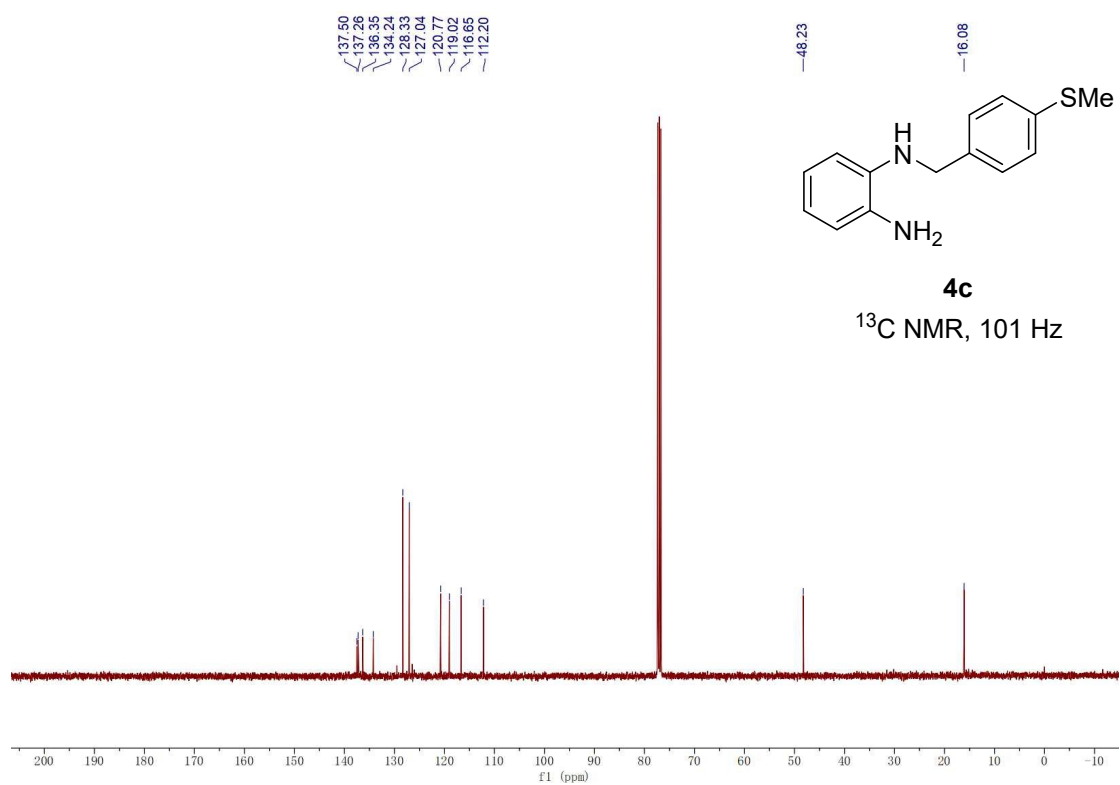

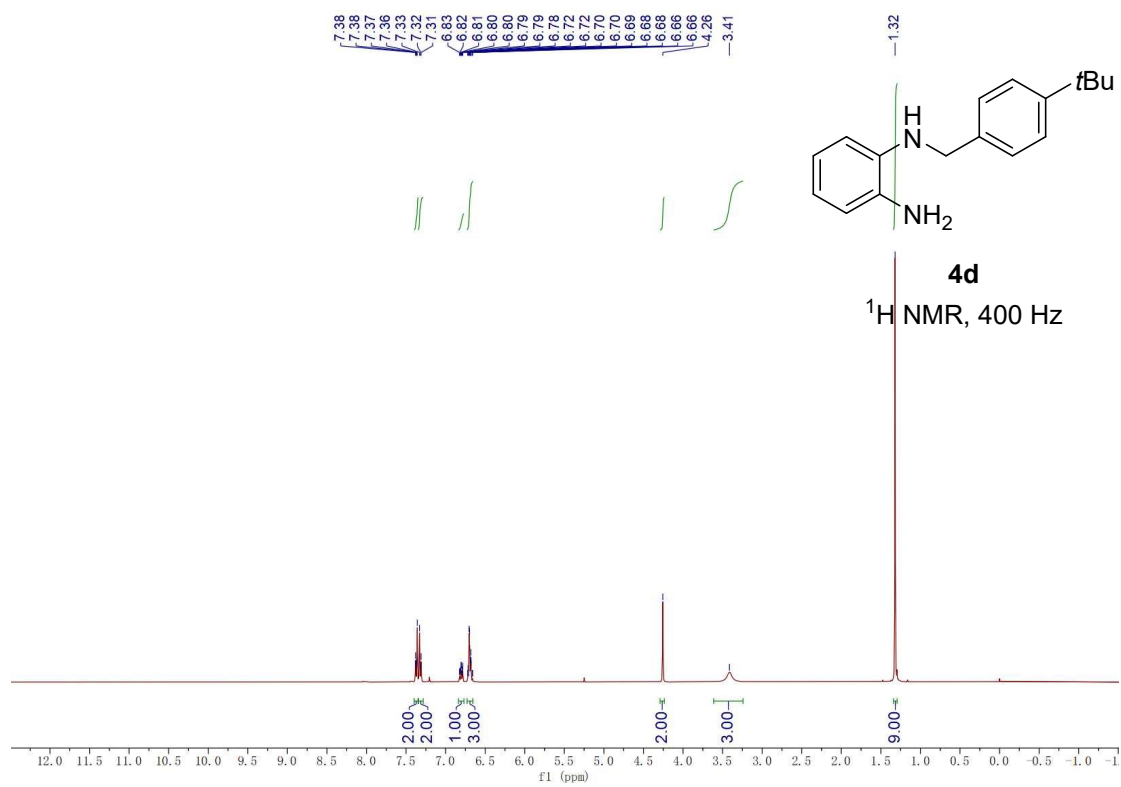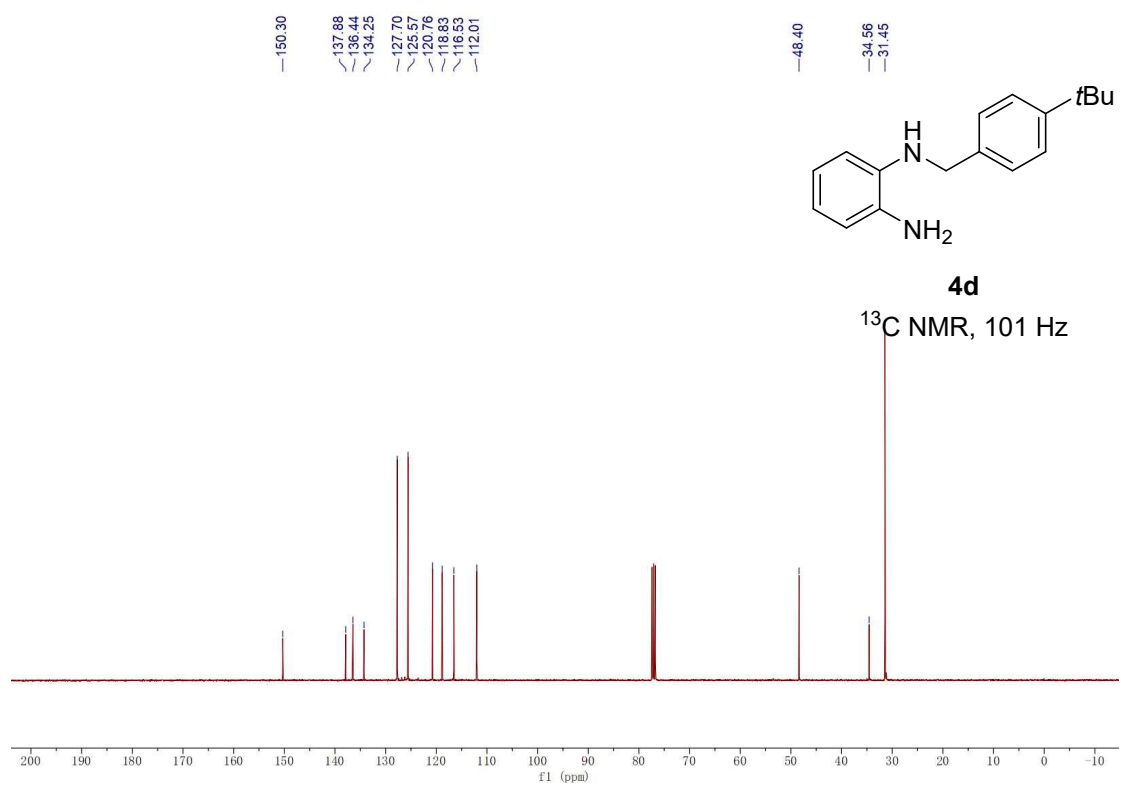



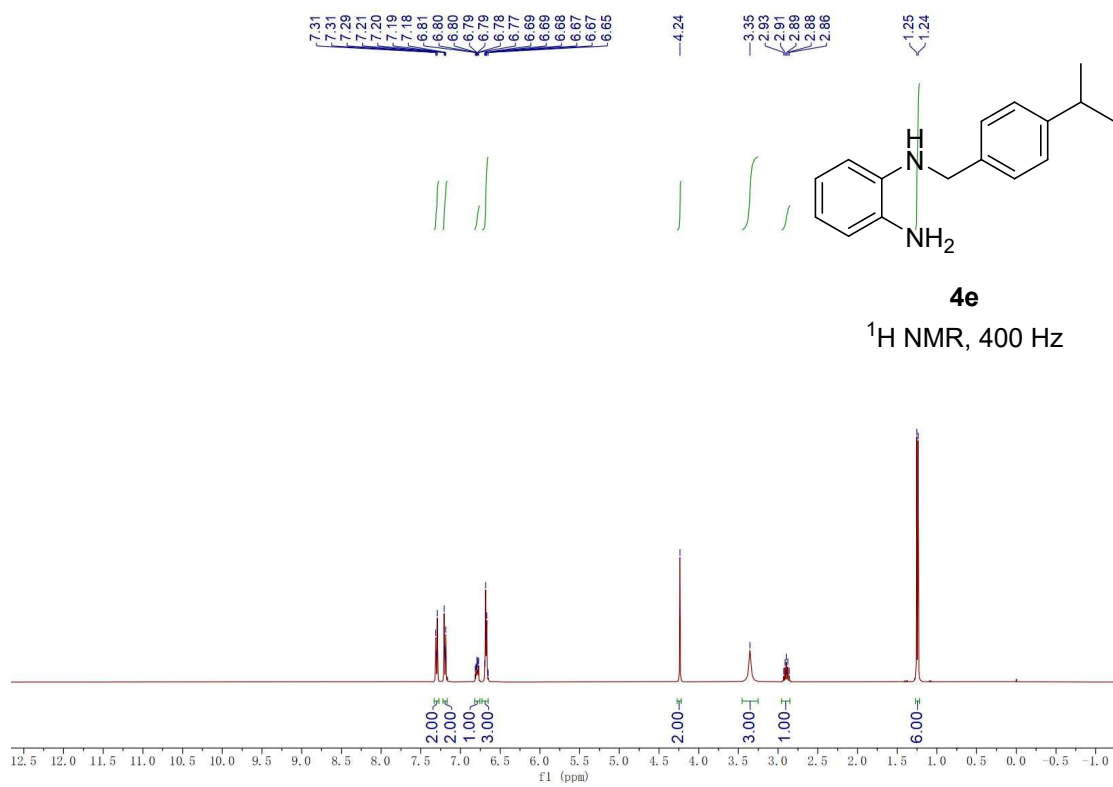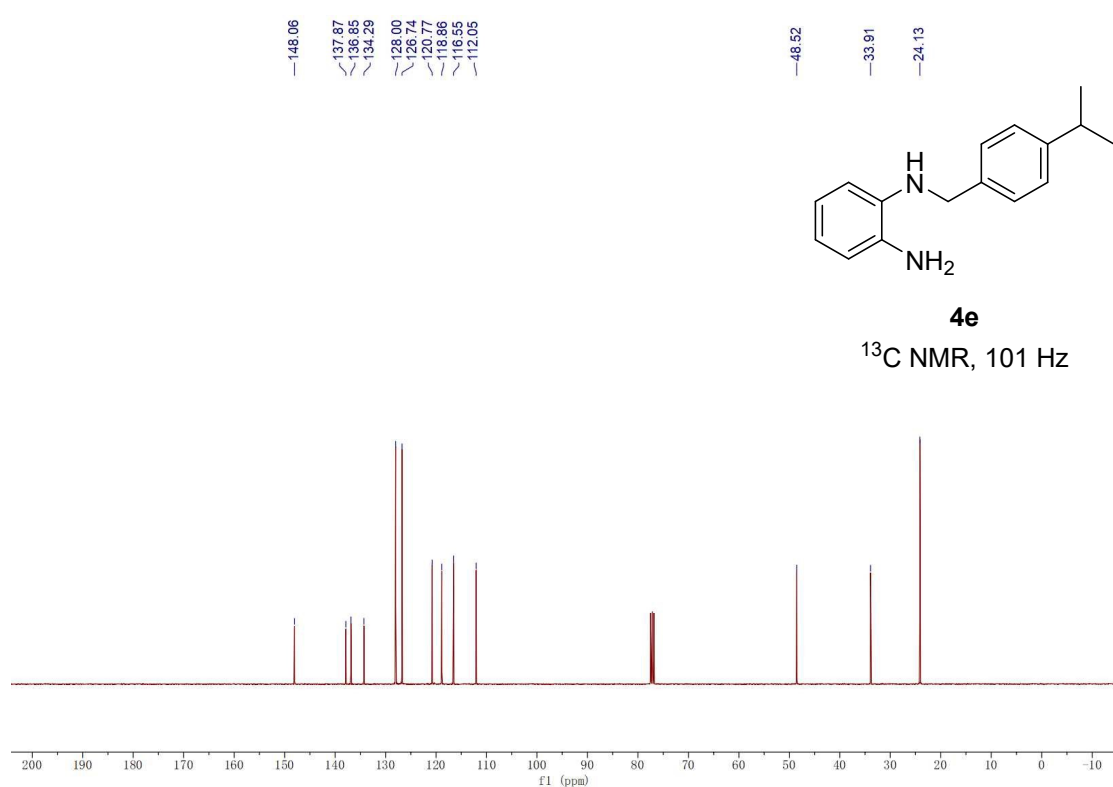

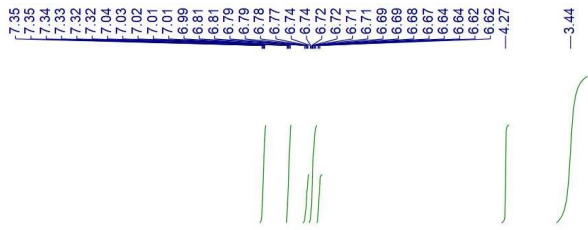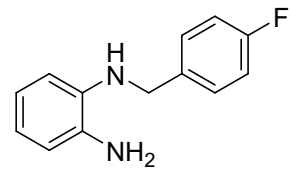

**4f**

<sup>1</sup>H NMR, 400 Hz

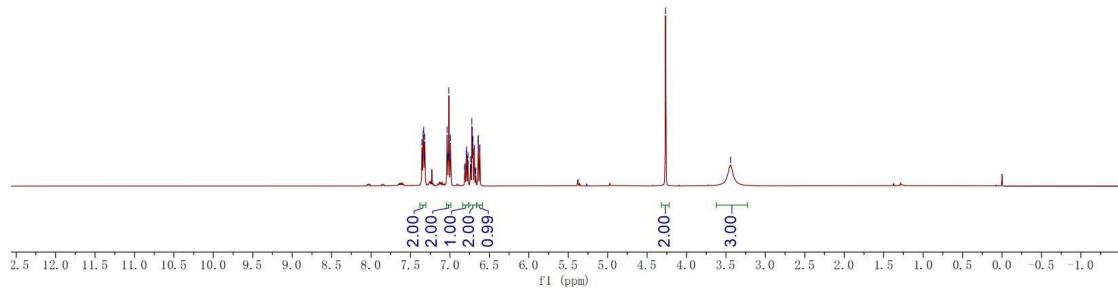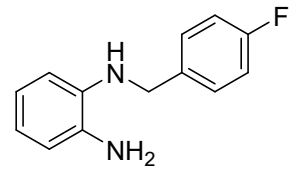

**4f**

<sup>13</sup>C NMR, 101 Hz

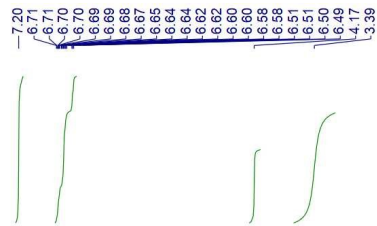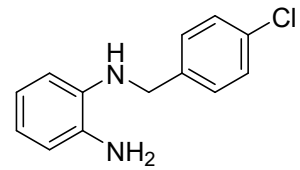

**4g**

<sup>1</sup>H NMR, 400 Hz

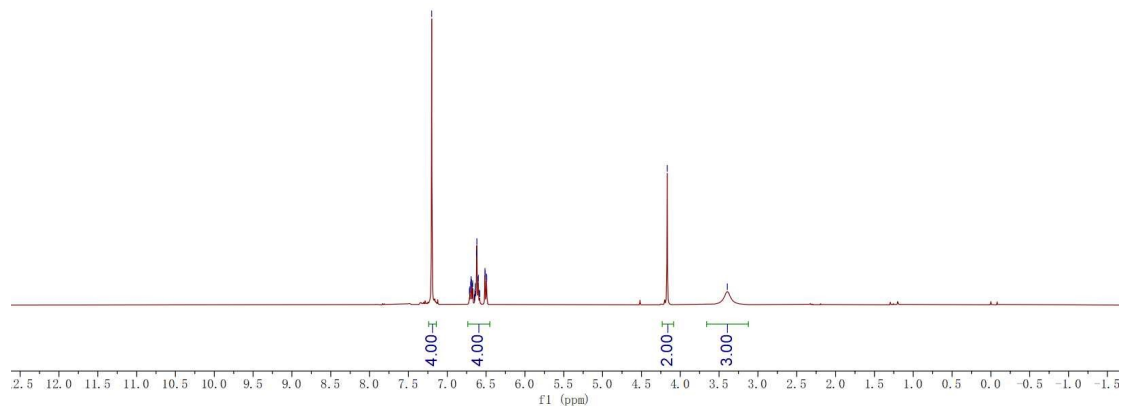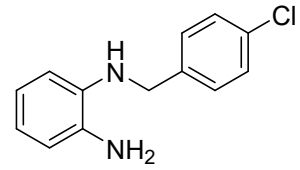

**4g**

<sup>13</sup>C NMR, 101 Hz

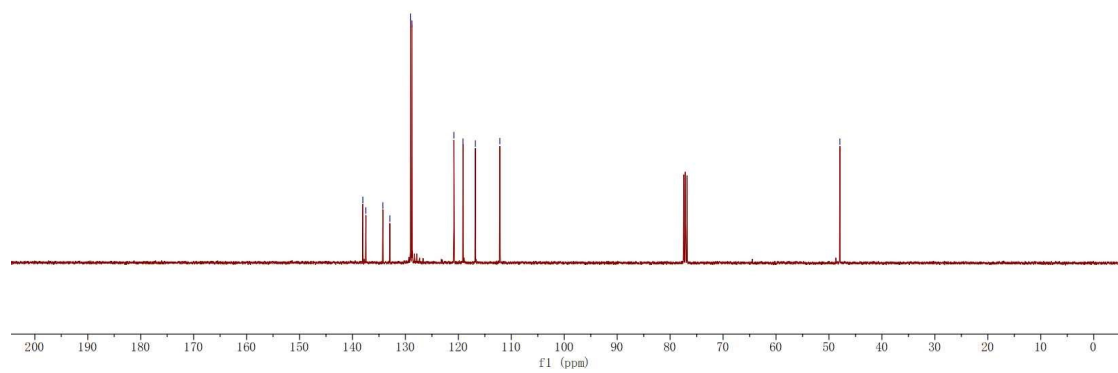

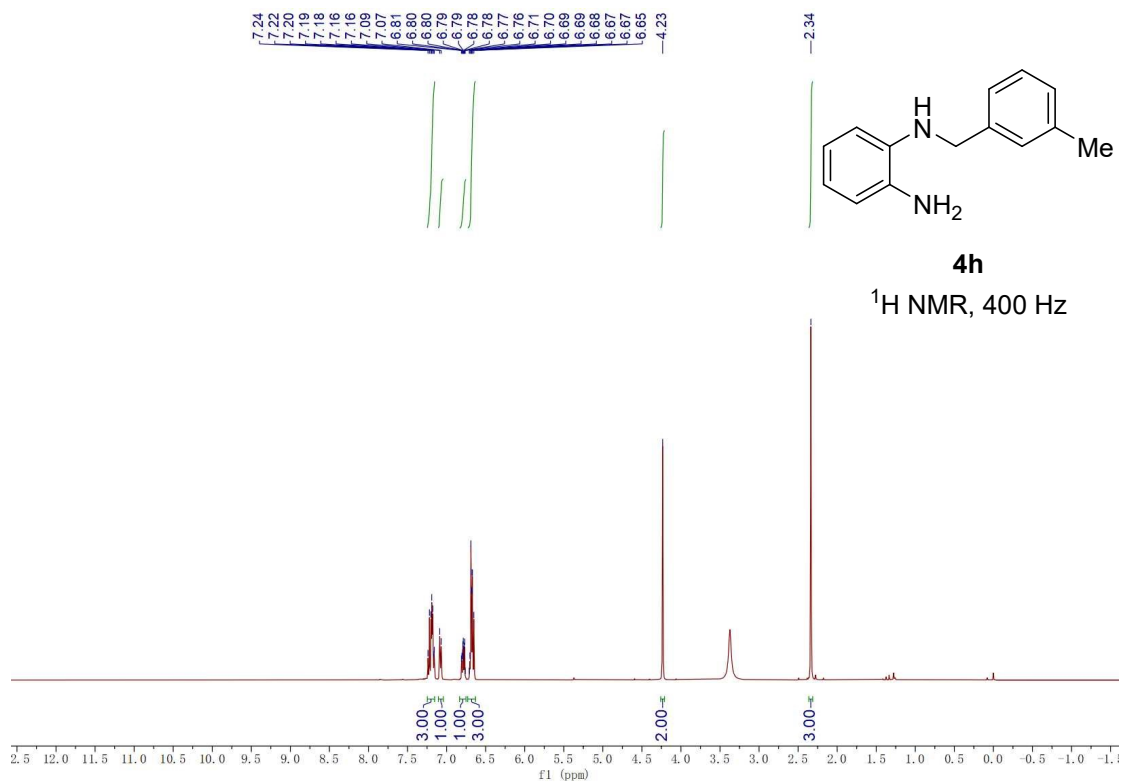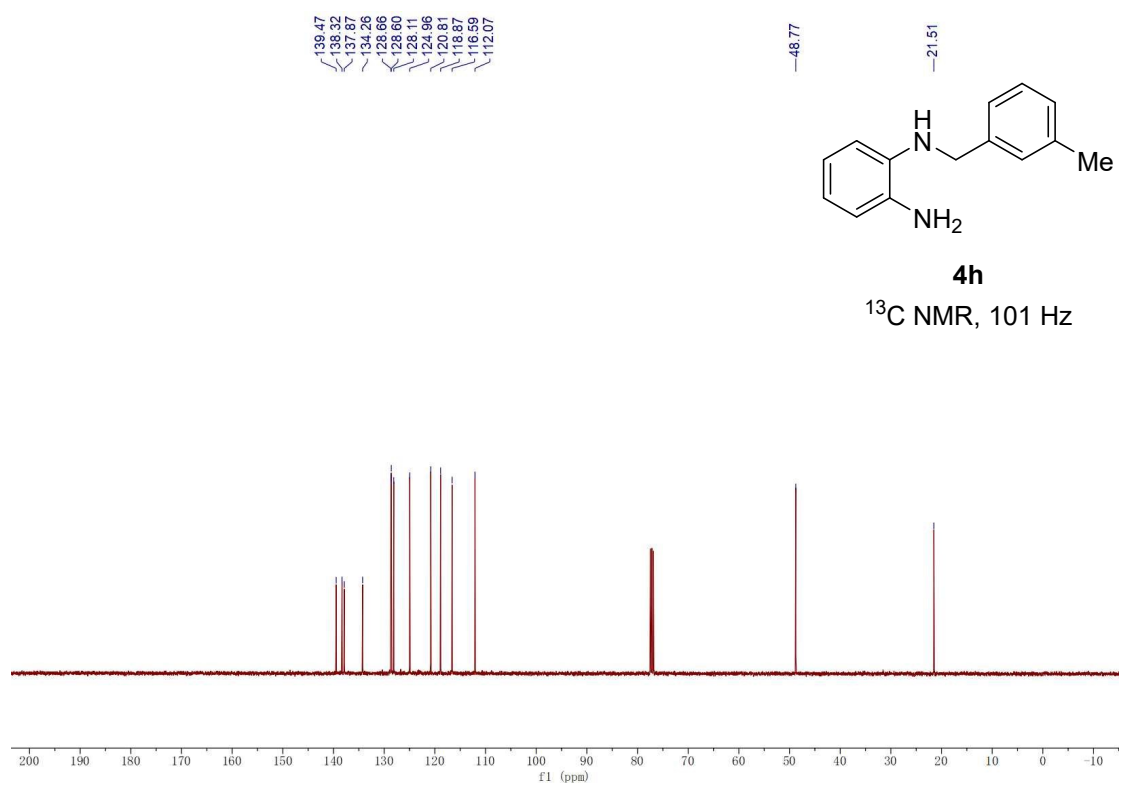

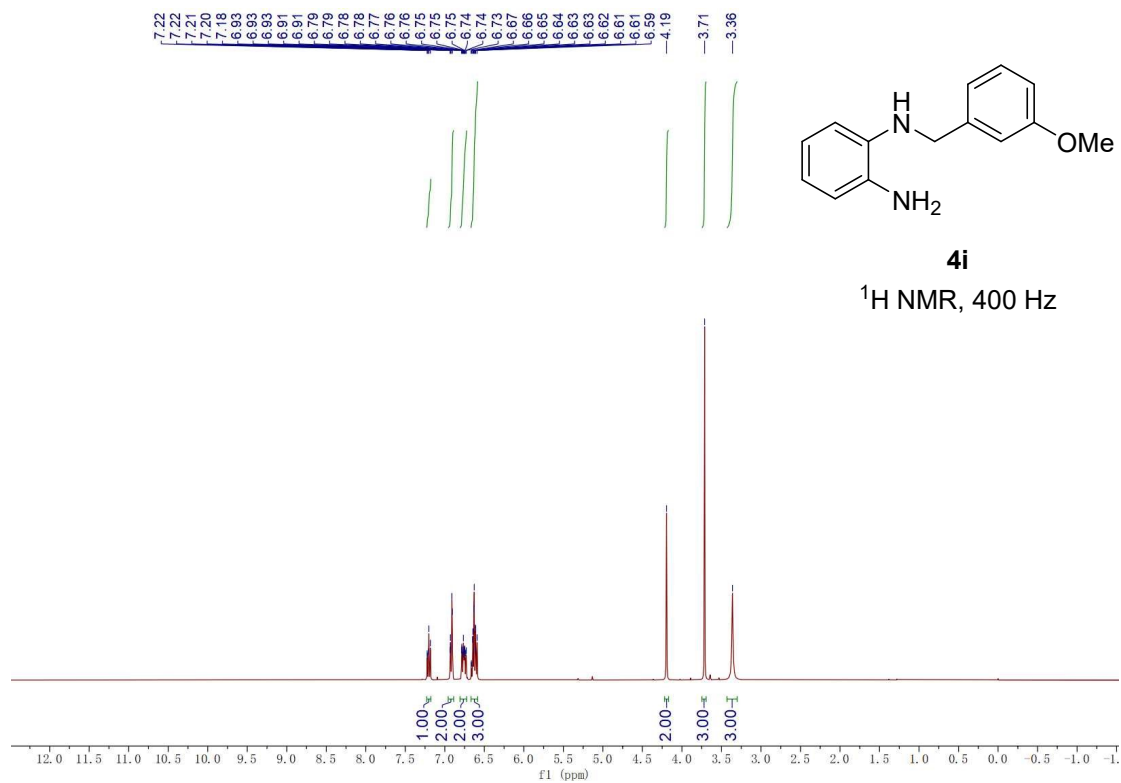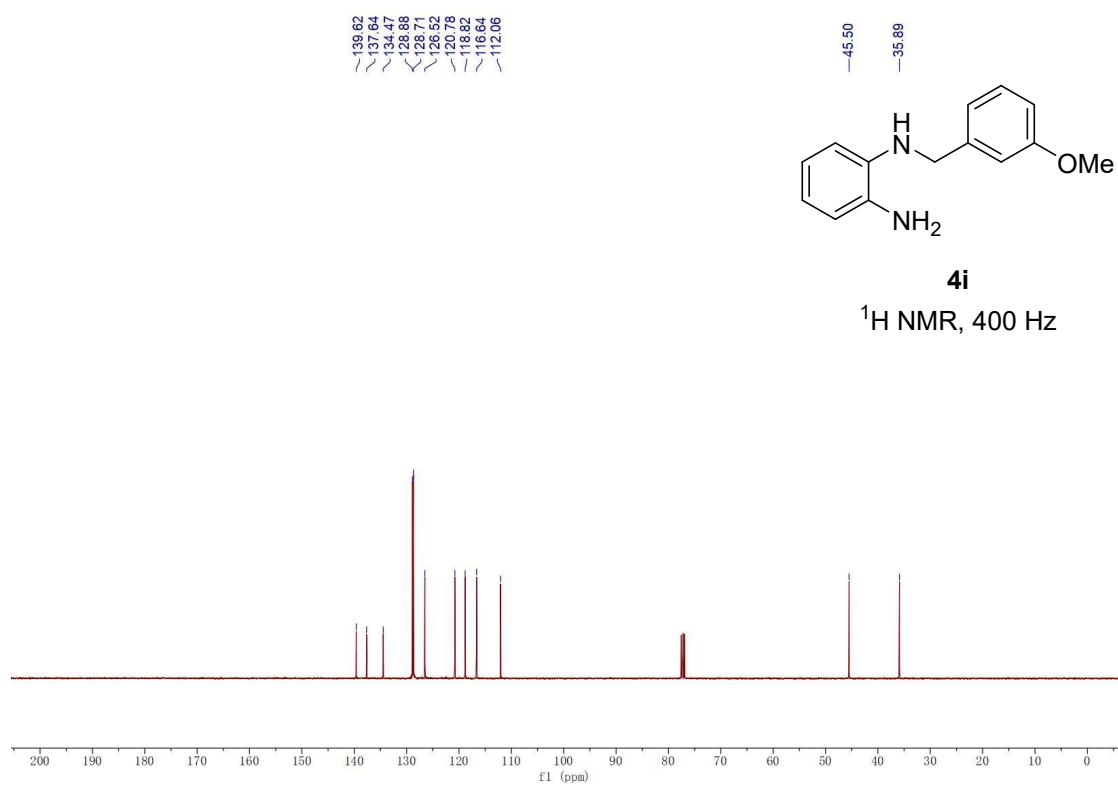

7.41  
7.28  
7.26  
7.16  
7.14  
7.07  
7.05  
6.69  
6.68  
6.67  
6.66  
6.59  
6.58  
6.48  
6.46

-4.11

-3.39

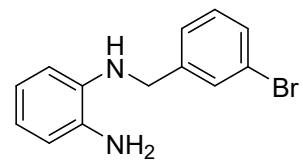

**4j**

<sup>1</sup>H NMR, 400 Hz

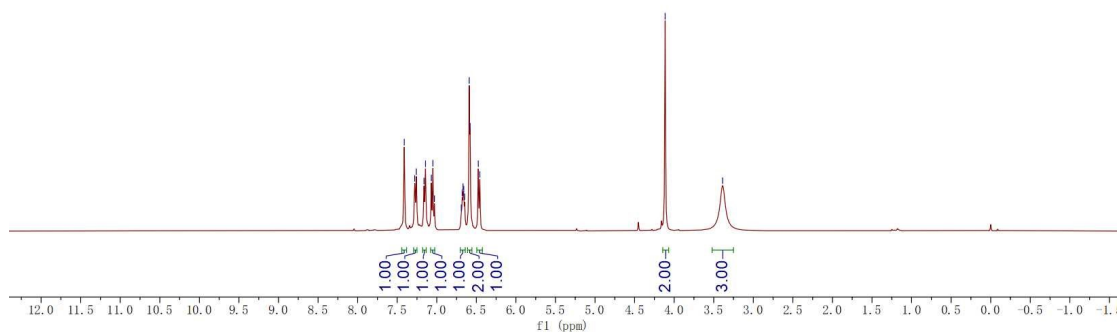

142.10  
137.43  
134.32  
130.69  
130.40  
130.26  
126.28  
122.81  
120.88  
119.21  
116.85  
112.20

-48.07

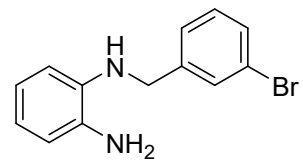

**4j**

<sup>13</sup>C NMR, 101 Hz

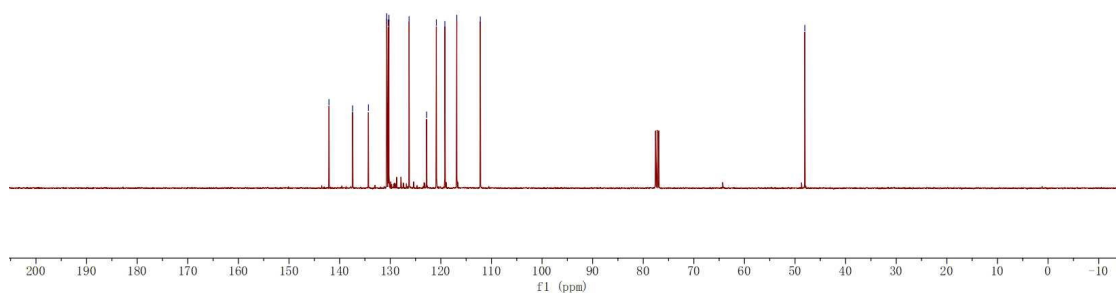

7.29  
7.28  
7.26  
7.24  
7.24  
7.22  
7.19  
7.19  
7.17  
7.17  
7.16  
7.16  
7.14  
7.14  
7.13  
7.12  
7.11  
7.10  
6.80  
6.80  
6.79  
6.78  
6.77  
6.76  
6.68  
6.67  
6.66  
6.66  
6.64  
6.64  
6.63  
6.62  
6.61  
4.18  
-3.27  
-2.33

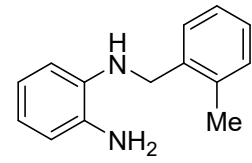

**4k**

<sup>1</sup>H NMR, 400 Hz

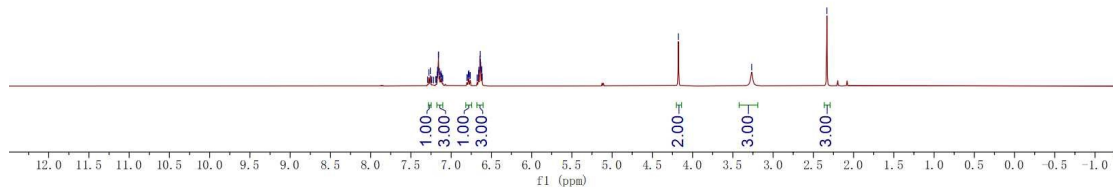

137.98  
137.35  
136.66  
134.36  
130.57  
128.61  
127.59  
126.33  
120.86  
118.90  
116.63  
111.97

-46.74

-18.10

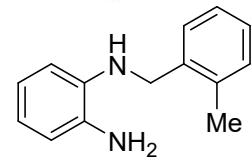

**4k**

<sup>13</sup>C NMR, 101 Hz

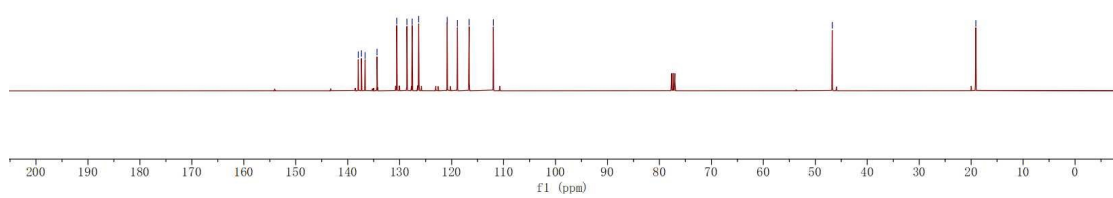

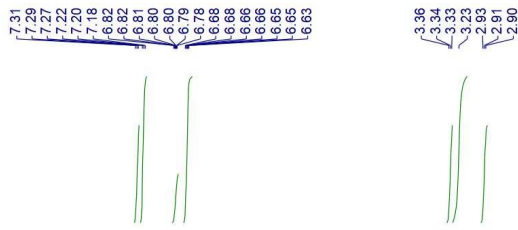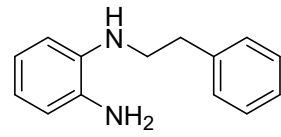

**4I**

<sup>1</sup>H NMR, 400 Hz

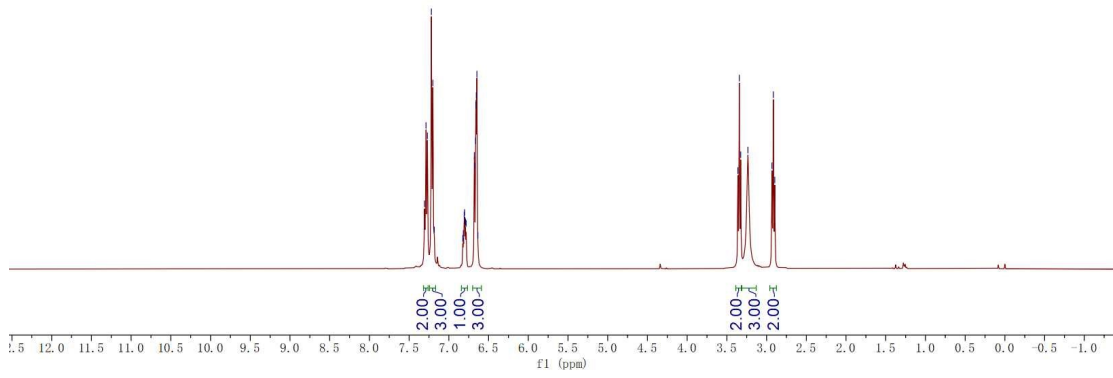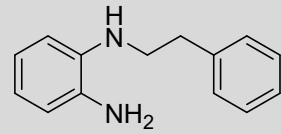

**4I**

<sup>13</sup>C NMR, 101 Hz



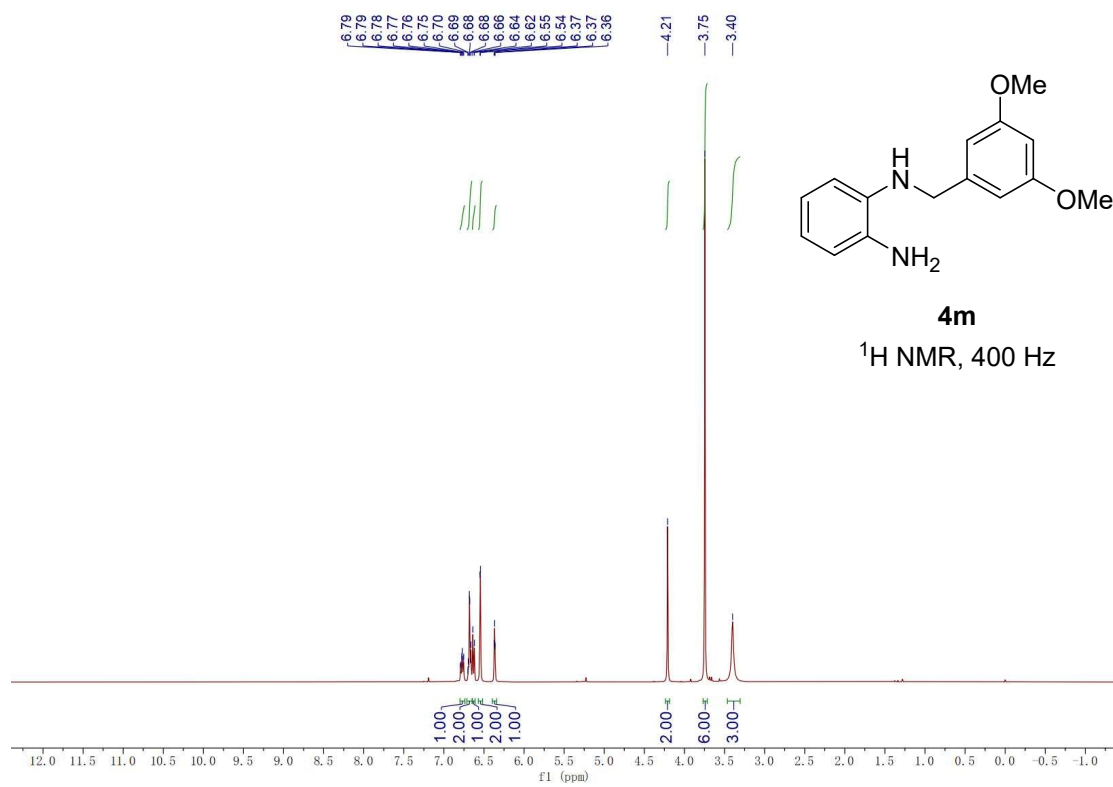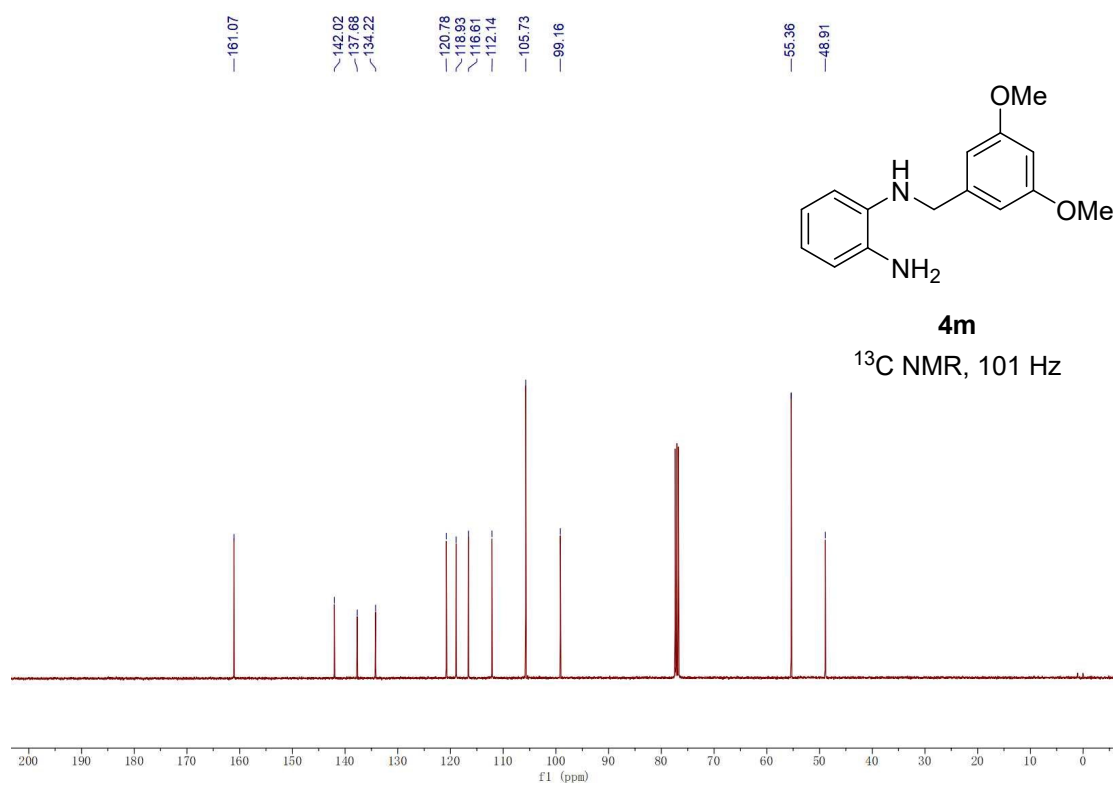

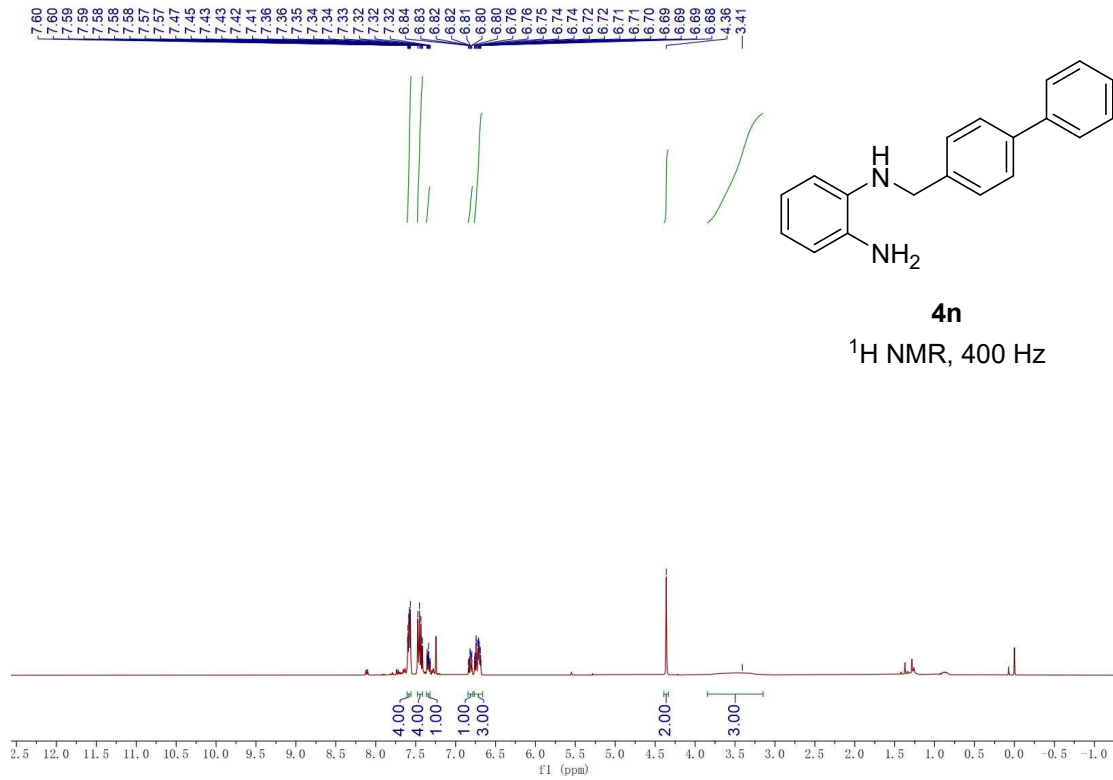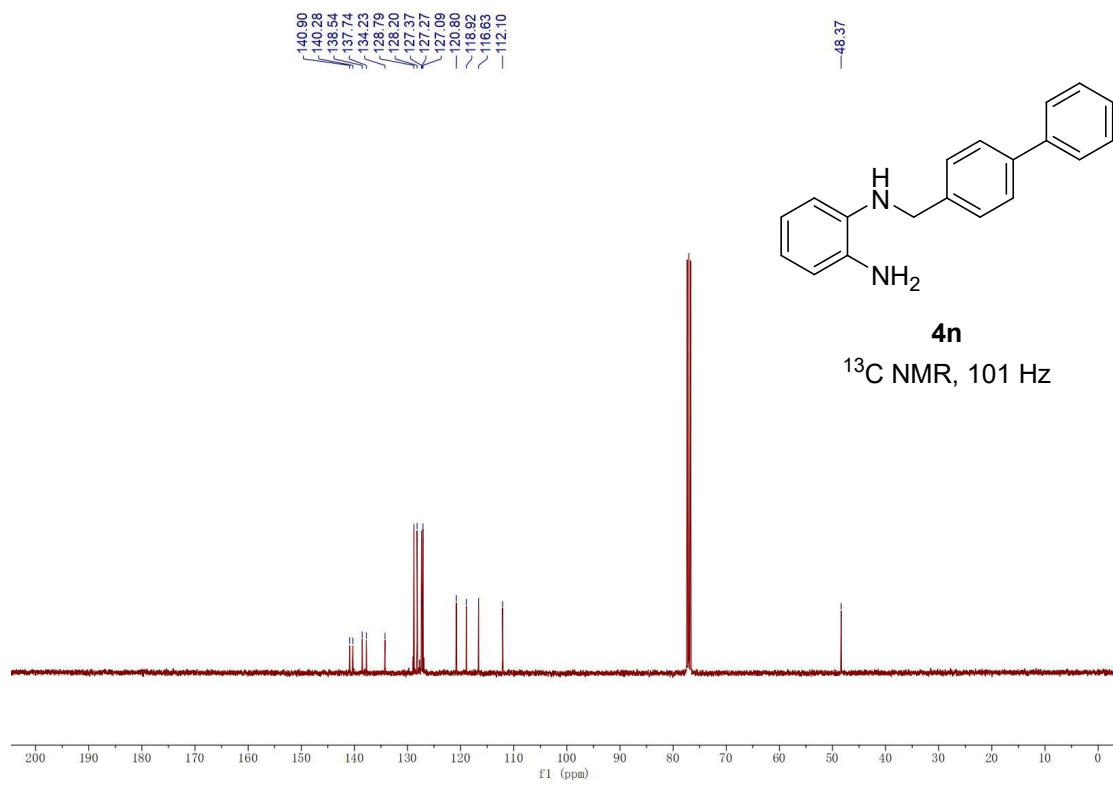

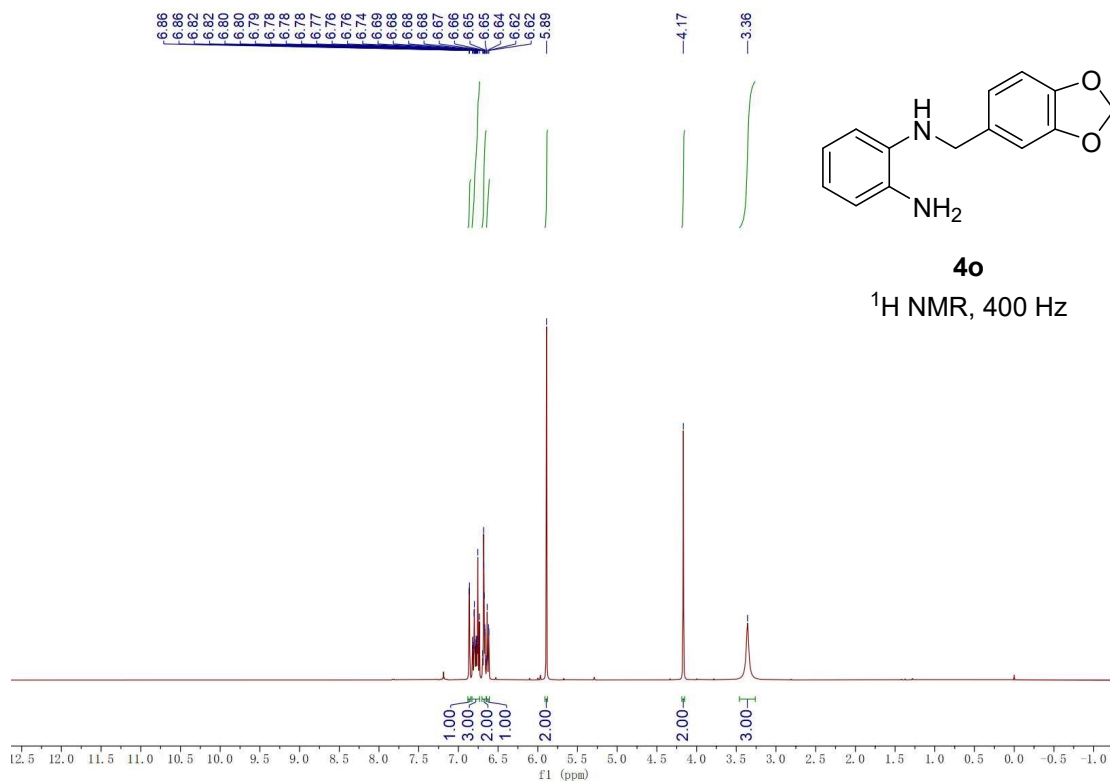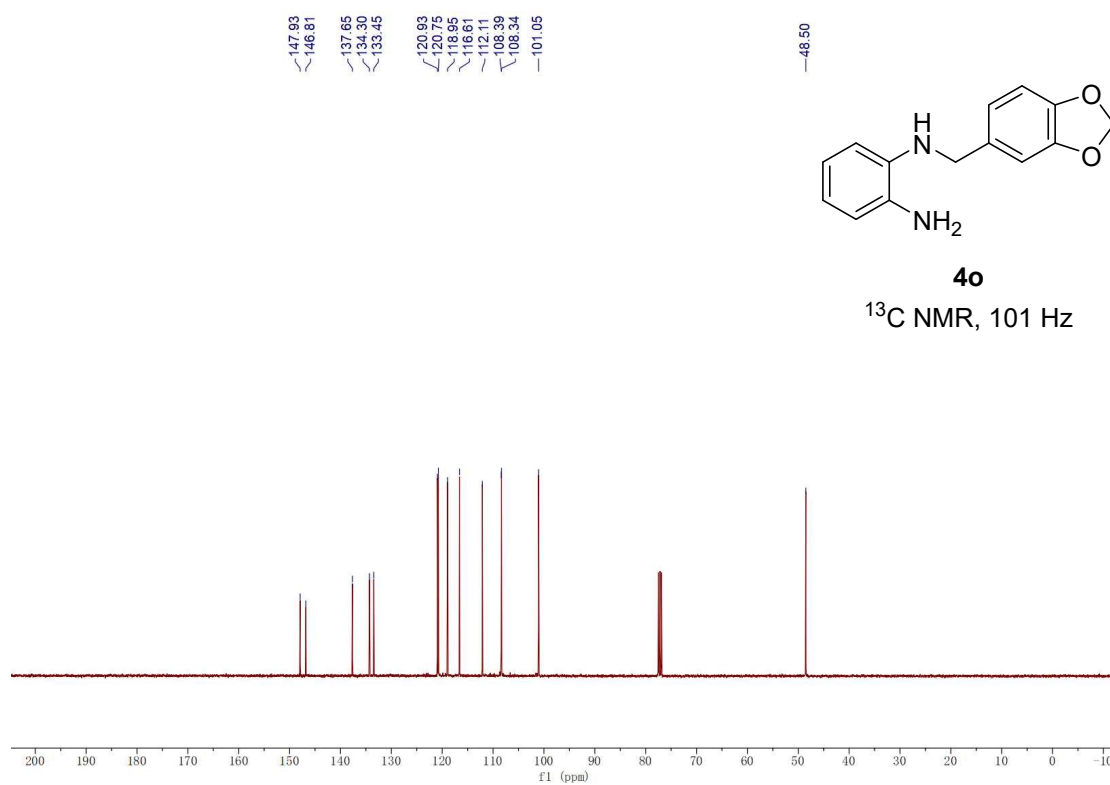

7.83  
7.82  
7.81  
7.80  
7.79  
7.78  
7.77  
7.51  
7.50  
7.49  
7.48  
7.46  
7.45  
7.44  
7.43  
6.81  
6.80  
6.79  
6.78  
6.77  
6.76  
6.74  
6.73  
6.72  
6.71  
6.70  
6.69  
6.68  
6.67  
6.66  
4.45  
-3.42

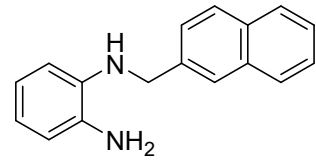

**4p**

<sup>1</sup>H NMR, 400 Hz

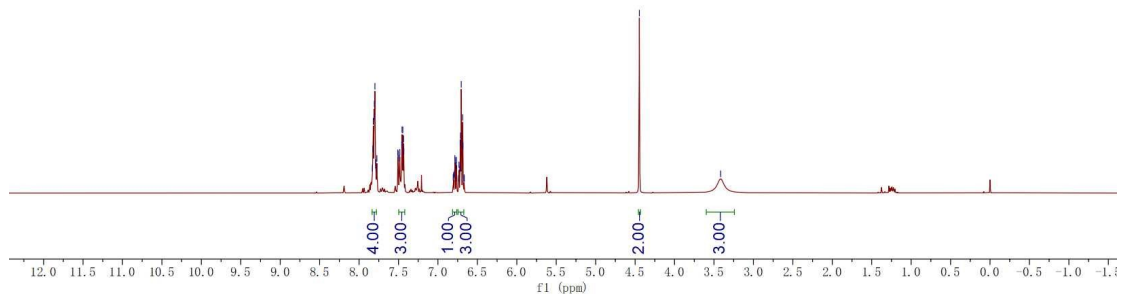

137.77  
136.98  
134.26  
133.55  
132.85  
128.36  
127.82  
127.75  
126.23  
126.18  
126.09  
125.78  
120.85  
118.97  
116.89  
112.22

48.87

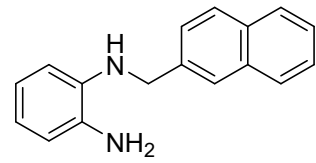

**4p**

<sup>13</sup>C NMR, 101 Hz

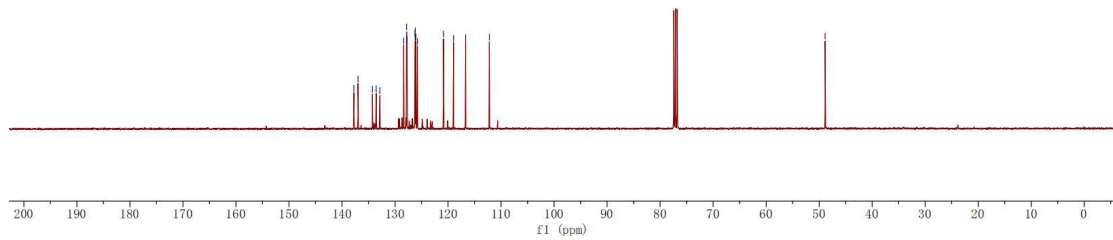

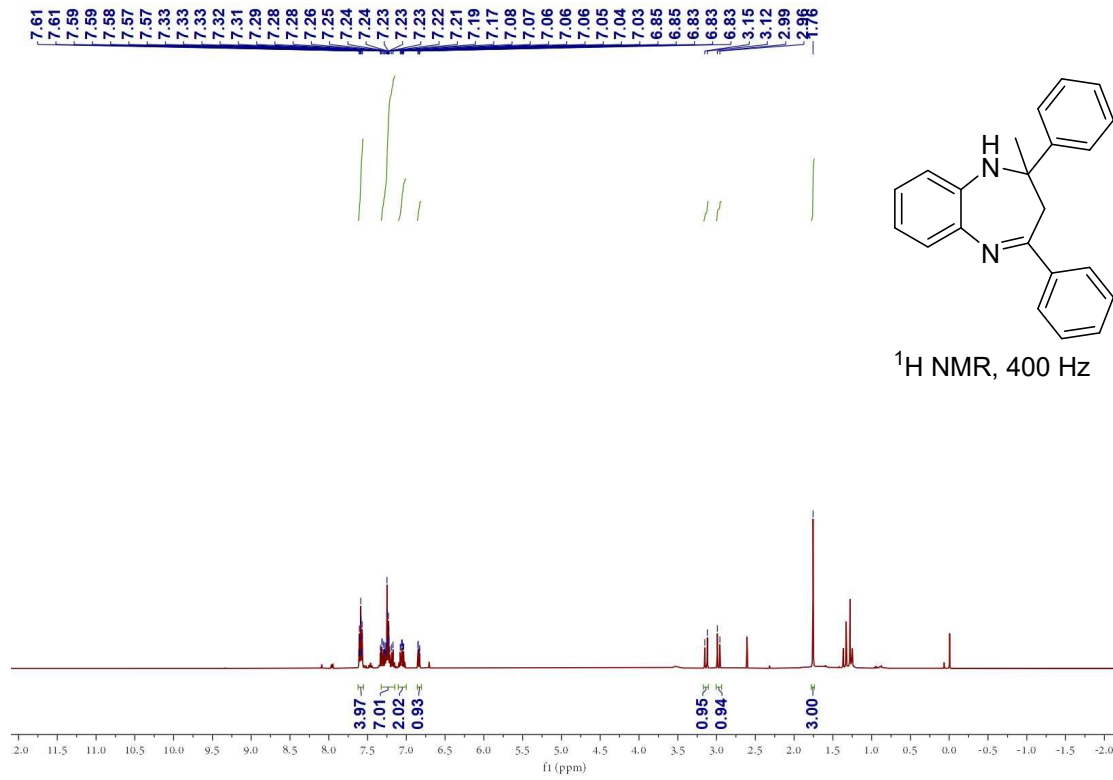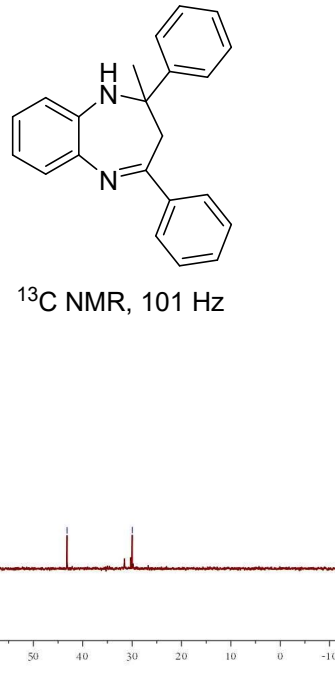

## 8. References

- (1) S. Michlik, T. Hille, R. Kempe, *Adv. Synth. Catal.*, 2012, **354**: 847-862.
- (2) P. Thapa, P. M. Palacios, T. Tran, B. S. Pierce, F. W. Foss, Jr., *J. Org. Chem.*, 2020, **85**, 1991-2009.
- (3) M. Sharma, P. Joshi, N. Kumar, S. Joshi, R. K. Rohilla, N. Ro, D. S. Rawat, *Eur. J. Med. Chem.*, 2011, **46**, 480-487.
- (4) Z. Wang, C. Li, H. Huang, and G. Deng, *J. Org. Chem.*, 2020, **85**, 9415-9423.
- (5) C. Loro, L. Molteni, M. Papis, E. M. Beccalli, D. Nava, L. L. Presti, S. Brenna, G. Colombo, F. Foschi, G. Broggini, *J. Org. Chem.*, 2022, **87**, 1032-1042.
- (6) Y. Ma, R. Xiong, Y. Feng, X. Zhang, Y. Xiong, *Tetrahedron*, 2020, **76**.
- (7) P. Thapa, P. M. Palacios, T. Tran, B. S. Pierce, F. W. Foss, *J. Org. Chem.*, 2020, **85**, 1991-2009.
- (8) A. Heydari, S. Khaksar, M. Esfandyari, M. Tajbakhsh, *Tetrahedron*, 2007, **63**, 3363-3366.
- (9) N. K. Gupta, S. Jayakumar, W. Huang, P. Leyssen, J. Neyts, S. O. Bachurin, J. R. Hwu, S. Tsay, *Int. J. of Mol. Sci.*, **2022**, 23, 12675.
- (10) C. Zhong, J. Cui, S. Yu, X. Wang, N. Wang, *Tetrahedron Lett.*, 2020, **61**, 151599.
- (11) S. Oh, S. Kim, S. Kong, G. Yang, N. Lee, D. Han, J. Goo, J. L. Siqueira-Neto, L. H. Freitas-Junior, R. Song, *Eur. J. Med. Chem.*, 214, **84**, 395-403.
